# Supplementary material for: Organo-cyanamides: convenient reagents for catalytic amidation of carboxylic acids
Source: Royal Society of Chemistry journal article supplement (doi:10.1039/d2cc05826j), 2022-12-08

## Supporting Information for

### Organo-cyanamides: convenient reagents for catalytic amidation of carboxylic acids

Li-Jing Li,<sup>a</sup> Zhong-Qiang Zhou,<sup>\*a</sup> Zi-Kui Liu,<sup>a</sup> Yuan-Yuan He,<sup>a</sup> Feng-Cheng Jia<sup>\*b</sup> and Xiao-Qiang Hu<sup>\*</sup>

<sup>a</sup> Key Laboratory of Catalysis and Energy Materials Chemistry of Ministry of Education & Hubei Key Laboratory of Catalysis and Materials Science, School of Chemistry and Materials Science, South-Central Minzu University, Wuhan 430074, China. E-mail: hxq071303127@126.com.

<sup>b</sup> School of Chemistry and Environmental Engineering, Wuhan Institute of Technology, Wuhan 430073, China. E-mail: fengcheng-Jia@wit.edu.cn.

**hxq071303127@126.com**

## Table of Contents

|                                                                          |    |
|--------------------------------------------------------------------------|----|
| 1. General information.....                                              | 3  |
| 2. Preparation of substrates.....                                        | 3  |
| 2.1 General procedure for preparation of product 1a <sup>[1]</sup> ..... | 3  |
| 3. General Procedure and Spectral Data of the Amidation Products.....    | 4  |
| 3.1 General procedure for preparation 3-5, 6aa-6fa.....                  | 4  |
| 3.2 Spectral data of the products 3-5, 6aa-6fa.....                      | 5  |
| 5. Gram-Scale Reaction.....                                              | 14 |
| Procedure for Gram-Scale Reaction.....                                   | 14 |
| 6. Synthetic Application.....                                            | 15 |
| 6.1 General procedure and spectral data for preparation 7.....           | 15 |
| 6.2 General procedure and spectral data for preparation 8.....           | 16 |
| 6.3 General procedure and spectral data for preparation 9.....           | 16 |
| 7. NMR Spectra of products 3-5, 6aa-6fa, 8-10.....                       | 19 |

## 1. General information

Unless otherwise noted, materials were purchased from commercial suppliers (Alfa, TCI and Sigma-Aldrich etc.), and used without further purification. All the solvents were treated according to general methods. All reactions were monitored by thin-layer chromatography (TLC) on silica gel plates using UV light as visualizing agent (if applicable). Flash column chromatography was performed using 200-300 mesh silica gel. <sup>1</sup>H NMR spectra were recorded on 400 and 600 MHz spectrophotometers. Chemical shifts are reported in delta ( $\delta$  (ppm)) units in parts per million (ppm) relative to the singlet (0 ppm) for tetramethylsilane (TMS). Data are reported as follows: chemical shift, multiplicity (s = singlet, d = doublet, t = triplet, q = quartet, dd = doublet of doublets, m = multiplet), coupling constants (Hz) and integration. <sup>13</sup>C NMR spectra were recorded on Varian Mercury 100 MHz with complete proton decoupling spectrophotometers (CDCl<sub>3</sub>: 77.0 ppm). The high resolution mass spectra (HRMS) were measured on a Shimadzu LCMS-IT-TOF mass spectrometer or DIONEX UltiMate 3000 & Bruker Compact TOF mass spectrometer by ESI. Measured values are reported to 4 decimal places of the calculated value. The calculated values are based on the most abundant isotope. The high resolution mass spectra (HRMS) were measured on a Shimadzu LCMS-IT-TOF mass spectrometer or DIONEX UltiMate 3000 & Bruker Compact TOF mass spectrometer by ESI.

## 2. Preparation of substrates

### 2.1 General procedure for preparation of product **1a**<sup>[1]</sup>

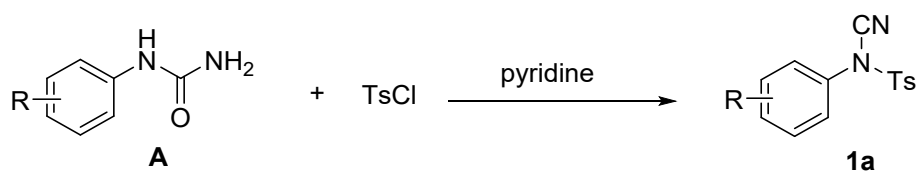

To a round-bottom flask, **1** (300 mg, 1 equiv), TsCl (477 mg, 2.5 equiv) and pyridine (2 mL) was added. The reaction mixture was stirred at room temperature for 15 minutes, and then added to ice-cooled water. The precipitate was collected by vacuum filtration. The mixture was removed under reduced pressure and the residue was purified by column chromatography to afford **1a**.

### 3. General Procedure and Spectral Data of the Amidation Products

#### 3.1 General procedure for preparation 3-5, 6aa-6fa

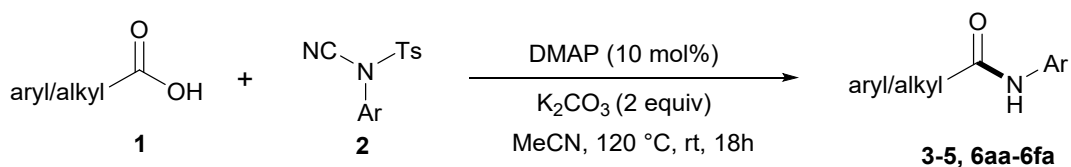

To an oven-dried round-bottom flask equipped with a magnetic stir bar, **1** (0.2 mmol, 1.0 equiv), carboxylic acid **2** (0.4 mmol, 2.0 equiv),  $K_2CO_3$  (0.4 mmol, 2.0 equiv) and DMAP (2.44 mg, 10 mol%) were added. The vessel was evacuated and filled with nitrogen (3 times). After that, the solvent was slowly added into the flask with a syringe in nitrogen atmosphere, maintaining at a temperature of 120 °C. The system was stirred for 18 hours as monitored by TLC analysis. The crude product was purified by flash chromatography on silica gel to afford pure product **3-5, 6aa-6fa**.

## 3.2 Spectral data of the products 3-5, 6aa-6fa

### Product 3aa (known compound, CAS: 7055-03-0)<sup>[2]</sup>

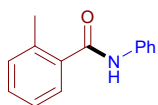

The crude product was purified by column chromatography (SiO<sub>2</sub>, petroleum ether/ethyl acetate = 20:1 to 10:1), yielding **3aa** as a white solid (29.3 mg, 74% yield). <sup>1</sup>H NMR (400 MHz, CDCl<sub>3</sub>) δ = 7.66 – 7.53 (m, 3H), 7.46 (d, *J* = 7.5 Hz, 1H), 7.36 (t, *J* = 7.8 Hz, 3H), 7.27 – 7.23 (m, 2H), 7.15 (t, *J* = 7.4 Hz, 1H), 2.49 (s, 3H). <sup>13</sup>C NMR (100 MHz, CDCl<sub>3</sub>) δ = 168.1, 138.0, 136.5, 136.4, 131.3, 130.3, 129.1, 126.6, 125.9, 124.6, 119.9, 19.8. M.P.: 126 – 128 °C.

### Product 3ba (known compound, CAS: 93-98-1)<sup>[3]</sup>

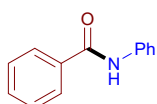

The crude product was purified by column chromatography (SiO<sub>2</sub>, petroleum ether/ethyl acetate = 20:1 to 10:1), yielding **3ba** as a white solid (29.3 mg, 74% yield). <sup>1</sup>H NMR (400 MHz, CDCl<sub>3</sub>) δ = 7.92 (s, 1H), 7.86 (d, *J* = 7.6 Hz, 2H), 7.64 (d, *J* = 7.9 Hz, 2H), 7.54 (t, *J* = 7.3 Hz, 1H), 7.47 (t, *J* = 7.5 Hz, 2H), 7.36 (t, *J* = 7.9 Hz, 2H), 7.15 (t, *J* = 7.4 Hz, 1H). <sup>13</sup>C NMR (100 MHz, CDCl<sub>3</sub>) δ = 165.9, 138.0, 135.0, 131.9, 129.1, 128.8, 127.1, 124.6, 120.3. M.P.: 163 – 164 °C.

### Product 3ca (known compound, CAS:56776-51-3)<sup>[4]</sup>

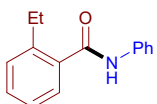

The crude product was purified by column chromatography (SiO<sub>2</sub>, petroleum ether/ethyl acetate = 20:1 to 10:1), yielding **3ca** as a white solid (39.5 mg, 88%). <sup>1</sup>H NMR (400 MHz, CDCl<sub>3</sub>) δ = 7.61 (d, *J* = 7.7 Hz, 2H), 7.50 (s, 1H), 7.45 (d, *J* = 7.4 Hz, 1H), 7.40 – 7.35 (m, 3H), 7.31 (d, *J* = 7.6 Hz, 1H), 7.27 – 7.23 (m, 1H), 7.15 (t, *J* = 7.4 Hz, 1H), 2.88 – 2.83 (m, 2H), 1.27 (t, *J* = 7.5 Hz, 3H). <sup>13</sup>C NMR (100 MHz, CDCl<sub>3</sub>) δ = 168.3, 142.6, 138.0, 136.2, 130.4, 129.7, 129.2, 126.6, 125.9, 124.6, 119.9, 26.4, 16.0. M.P.: 128 – 130 °C.

### Product 3da (known compound, CAS:90292-79-8)<sup>[5]</sup>

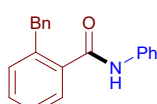

The crude product was purified by column chromatography (SiO<sub>2</sub>, petroleum ether/ethyl acetate = 20:1 to 10:1), yielding **3da** as a white solid (40.7 mg, 71% yield). <sup>1</sup>H NMR (400 MHz, CDCl<sub>3</sub>) δ = 7.54 (d, *J* = 7.4 Hz, 1H), 7.45 – 7.41 (m, 4H), 7.35 – 7.26 (m, 6H), 7.24 – 7.12 (m, 4H), 4.25 (s, 2H). <sup>13</sup>C NMR (100 MHz, CDCl<sub>3</sub>) δ = 168.0, 140.6, 138.6, 137.8, 136.9, 131.3, 130.5, 129.0, 128.9, 128.7, 127.5, 126.7, 126.4, 124.5, 119.9, 39.0. M.P.: 123 – 125 °C.

### Product 3ea (known compound, CAS:6833-13-2)<sup>[6]</sup>

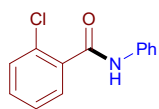

The crude product was purified by column chromatography (SiO<sub>2</sub>, petroleum ether/ethyl acetate = 20:1 to 10:1), yielding **3ea** as a white solid (30.9 mg, 67%). <sup>1</sup>H NMR (400 MHz, CDCl<sub>3</sub>) δ = 7.89 (s, 1H), 7.77 (d, *J* = 7.3 Hz, 1H), 7.65 (d, *J* = 8.0 Hz, 2H), 7.48 – 7.34 (m, 5H), 7.18 (t, *J* = 7.3 Hz, 1H). <sup>13</sup>C NMR (100 MHz, CDCl<sub>3</sub>) δ = 164.4, 137.6, 135.2, 131.8, 130.6 (overlap), 130.4, 129.2, 127.4, 124.9, 120.1. M.P.: 114 – 115 °C.

**Product 3fa (known compound, CAS:22978-42-3)<sup>[7]</sup>**

The crude product was purified by column chromatography (SiO<sub>2</sub>, petroleum ether/ethyl acetate = 20:1 to 10:1), yielding **3fa** as a yellow solid (35 mg, 66% yield). <sup>1</sup>H NMR (400 MHz, CDCl<sub>3</sub>) δ = 7.72 (d, *J* = 7.4 Hz, 1H), 7.64 (s, 1H), 7.61 – 7.56 (m, 4H), 7.36 (t, *J* = 7.8 Hz, 2H), 7.17 (t, *J* = 7.4 Hz, 1H). <sup>13</sup>C NMR (100 MHz, CDCl<sub>3</sub>) δ = 165.8, 137.5, 135.8, 132.2, 130.2, 129.1, 128.6, 127.1, 126.5 (q, *J* = 4.9 Hz), 126.0 (q, *J* = 211.9 Hz), 125.0, 120.3. M.P.: 146 – 148 °C. <sup>19</sup>F NMR (376 MHz, CDCl<sub>3</sub>) δ = -58.89.

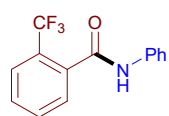

**Product 3ga (known compound, CAS: 6833-18-7)<sup>[8]</sup>**

The crude product was purified by column chromatography (SiO<sub>2</sub>, petroleum ether/ethyl acetate = 20:1 to 10:1), yielding **3ga** as a white solid (20.7 mg, 54% yield). <sup>1</sup>H NMR (400 MHz, CDCl<sub>3</sub>) δ = 7.84 (s, 1H), 7.77 (d, *J* = 8.0 Hz, 2H), 7.64 (d, *J* = 8.0 Hz, 2H), 7.36 (t, *J* = 7.9 Hz, 2H), 7.28 (d, *J* = 8.0 Hz, 2H), 7.14 (t, *J* = 7.4 Hz, 1H), 2.42 (s, 3H). <sup>13</sup>C NMR (100 MHz, CDCl<sub>3</sub>) δ = 165.7, 142.4, 138.1, 132.2, 129.4, 129.1, 127.0, 124.4, 120.2, 21.5. M.P.: 132 – 133 °C.

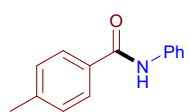

**Product 3ha (known compound, CAS:1029437-56-6)<sup>[9]</sup>**

The residue was purified by column chromatography (SiO<sub>2</sub>, petroleum ether/ethyl acetate = 20:1 to 10:1), yielding **3ha** as a white solid (58.4 mg, 87% yield). <sup>1</sup>H NMR (400 MHz, CDCl<sub>3</sub>) δ = 7.79 (d, *J* = 8.0 Hz, 3H), 7.66 – 7.61 (m, 2H), 7.37 (t, *J* = 7.8 Hz, 2H), 7.28 (d, *J* = 8.0 Hz, 2H), 7.15 (t, *J* = 7.08 Hz, 1H), 2.68 (t, *J* = 7.7 Hz, 2H), 1.68 – 1.61 (m, 2H), 1.41 – 1.34 (m, 2H), 0.94 (t, *J* = 7.3 Hz, 3H). <sup>13</sup>C NMR (100 MHz, CDCl<sub>3</sub>) δ = 165.7, 147.4, 138.1, 132.4, 129.1, 128.8, 127.0, 124.4, 120.2, 35.6, 33.3, 22.3, 13.9. M.P.: 116 – 118 °C.

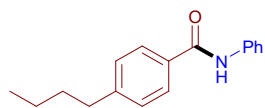

**Product 3ia (known compound, CAS:7465-88-5)<sup>[8]</sup>**

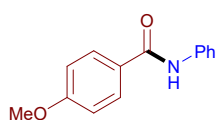

The crude product was purified by column chromatography (SiO<sub>2</sub>, petroleum ether/ethyl acetate = 20:1 to 10:1), yielding **3ia** as a white solid (24.7 mg, 54% yield).

<sup>1</sup>H NMR (400 MHz, CDCl<sub>3</sub>) δ = 7.84 (d, *J* = 8.6 Hz, 2H), 7.63 (d, *J* = 8.0 Hz, 2H), 7.36 (t, *J* = 7.8 Hz, 2H), 7.14 (t, *J* = 7.3 Hz, 1H), 6.96 (d, *J* = 8.7 Hz, 2H), 3.87 (s, 3H). <sup>13</sup>C NMR (100 MHz, CDCl<sub>3</sub>) δ = 165.2, 162.5, 138.1, 129.1, 128.9, 127.2, 124.4, 120.2, 114.0, 55.5. M.P.: 162 – 163 °C.

#### Product 3ja (known compound, CAS:6833-15-4)<sup>[3]</sup>

The crude product was purified by column chromatography (SiO<sub>2</sub>, petroleum ether/ethyl acetate = 20:1 to 10:1), yielding **3ja** as a white solid (30.5 mg, 66 % yield). <sup>1</sup>H NMR (400 MHz, CDCl<sub>3</sub>)

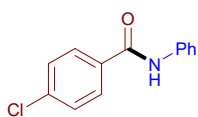

δ = 7.82 (d, *J* = 8.4 Hz, 2H), 7.77 (s, 1H), 7.63 (d, *J* = 7.9 Hz, 2H), 7.47 (d, *J* = 8.5 Hz, 2H), 7.38 (t, *J* = 7.8 Hz, 2H), 7.17 (t, *J* = 7.4 Hz, 1H). <sup>13</sup>C NMR (101 MHz, DMSO-*d*<sub>6</sub>)

δ = 164.9, 139.4, 136.8, 134.1, 130.1, 129.1, 128.9, 124.3, 120.9. M.P.: 196-197 °C.

#### Product 3ka (known compound, CAS:17922-96-2)<sup>[8]</sup>

The crude product was purified by column chromatography (SiO<sub>2</sub>, petroleum ether/ethyl acetate = 20:1 to 10:1), yielding **3ka** as a white solid (29.8 mg, 67% yield). <sup>1</sup>H NMR (400 MHz, CDCl<sub>3</sub>) δ

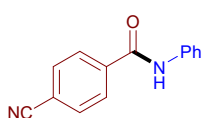

= 7.97 (d, *J* = 8.0 Hz, 2H), 7.92 (s, 1H), 7.78 (d, *J* = 8.0 Hz, 2H), 7.63 (d, *J* = 8.0 Hz, 2H), 7.39 (t, *J* = 7.8 Hz, 2H), 7.20 (t, *J* = 7.4 Hz, 1H). <sup>13</sup>C NMR (100 MHz, CDCl<sub>3</sub>) δ =

163.9, 138.9, 137.3, 132.6, 129.2, 127.8, 125.3, 120.4, 117.9, 115.4. M.P.: 192 – 193 °C.

#### Product 3la (known compound, CAS:878952-07-9)<sup>[10]</sup>

The crude product was purified by column chromatography (SiO<sub>2</sub>, petroleum ether/ethyl acetate = 20:1 to 10:1), yielding **3la** as a white solid (33 mg, 60% yield). <sup>1</sup>H NMR (400 MHz, CDCl<sub>3</sub>) δ

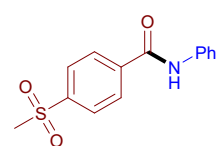

= 8.09 – 8.03 (m, 4H), 7.92 (s, 1H), 7.66 (d, *J* = 7.7 Hz, 2H), 7.41 (t, *J* = 7.7 Hz, 2H), 7.21 (t, *J* = 7.4 Hz, 1H), 3.10 (s, 3H). <sup>13</sup>C NMR (100 MHz, DMSO-*d*<sub>6</sub>) δ = 164.8,

143.6, 140.0, 139.2, 129.2, 129.1, 127.5, 124.6, 120.9, 43.8. M.P.: 206 – 208 °C.

#### Product 3ma (known compound, CAS: 23099-05-0)<sup>[11]</sup>

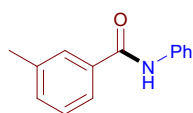

The crude product was purified by column chromatography (SiO<sub>2</sub>, petroleum ether/ethyl acetate = 20:1 to 10:1), yielding **3ma** as a white solid (33.7 mg, 80% yield). <sup>1</sup>H NMR (400 MHz, CDCl<sub>3</sub>) δ = 7.91 (s, 1H), 7.68 – 7.61 (m, 4H), 7.38 – 7.35 (m, 4H), 7.14 (t, *J* = 7.1 Hz, 1H), 2.41 (s, 3H). <sup>13</sup>C NMR (100 MHz, CDCl<sub>3</sub>) δ = 166.0, 138.7, 138.0, 135.0, 132.6, 129.1, 127.8, 124.5, 124.0, 120.2, 21.4. M.P.: 124 – 125 °C.

**Product 3na (known compound, CAS:228423-11-8)<sup>[12]</sup>**

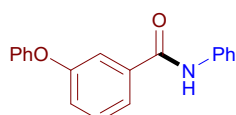

The crude product was purified by column chromatography (SiO<sub>2</sub>, petroleum ether/ethyl acetate = 20:1 to 10:1), yielding **3na** as a white solid (33.5 mg, 58% yield). <sup>1</sup>H NMR (400 MHz, CDCl<sub>3</sub>) δ = 7.82 (s, 1H), 7.61 (d, *J* = 8.0 Hz, 2H), 7.56 (d, *J* = 7.7 Hz, 1H), 7.50 (s, 1H), 7.43 (t, *J* = 7.9 Hz, 1H), 7.37 – 7.34 (m, 4H), 7.19 – 7.13 (m, 3H), 7.04 (d, *J* = 8.0 Hz, 2H). <sup>13</sup>C NMR (100 MHz, CDCl<sub>3</sub>) δ = 165.1, 158.0, 156.5, 137.8, 136.9, 130.2, 130.0, 129.1, 124.7, 124.0, 121.9, 121.4, 120.2, 119.3, 117.2. M.P.: 105 – 106 °C.

**Product 3oa (known compound, CAS:92579-24-3)<sup>[13]</sup>**

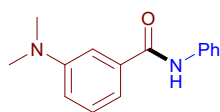

The crude product was purified by column chromatography (SiO<sub>2</sub>, petroleum ether/ethyl acetate = 20:1 to 10:1), yielding **3oa** as a yellow solid (26.3 mg, 55% yield). <sup>1</sup>H NMR (400 MHz, CDCl<sub>3</sub>) δ = 7.89 (s, 1H), 7.65 (d, *J* = 7.9 Hz, 2H), 7.36 (t, *J* = 7.8 Hz, 2H), 7.30 (t, *J* = 7.9 Hz, 1H), 7.14 (t, *J* = 7.4 Hz, 1H), 7.07 (d, *J* = 7.9 Hz, 1H), 6.87 (dd, *J* = 8.3, 2.8 Hz, 1H), 3.00 (s, 6H). <sup>13</sup>C NMR (101 MHz, CDCl<sub>3</sub>) δ = 166.6, 150.8, 138.2, 135.9, 129.3, 129.1, 124.4, 120.1, 115.5, 113.9, 111.4, 40.5. M.P.: 133 – 134 °C.

**Product 3pa (known compound, CAS:1379820-76-4)<sup>[14]</sup>**

The crude product was purified by column chromatography (SiO<sub>2</sub>, petroleum ether/ethyl acetate = 20:1 to

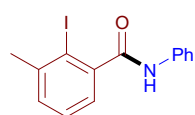

10:1), yielding **3pa** as a white solid (44.5 mg, 66% yield). <sup>1</sup>H NMR (400 MHz, CDCl<sub>3</sub>) δ = 7.63 (d, *J* = 7.9 Hz, 2H), 7.43 (s, 1H), 7.38 (t, *J* = 7.9 Hz, 2H), 7.31 (d, *J* = 4.8 Hz, 2H), 7.26 – 7.22 (m, 1H), 7.17 (t, *J* = 7.4 Hz, 1H), 2.51 (s, 3H). <sup>13</sup>C NMR (100 MHz, CDCl<sub>3</sub>) δ = 168.3, 143.8, 143.1, 137.6, 130.8, 129.2, 128.3, 125.2, 124.9, 120.1, 99.3, 29.2. M.P.: 146 – 147 °C.

**Product 3qa (known compound, CAS:1916324-03-2)<sup>[15]</sup>**



The crude product was purified by column chromatography (SiO<sub>2</sub>, petroleum ether/ethyl acetate = 20:1 to 10:1), yielding **3qa** as a white solid (34.5 mg, 70% yield). <sup>1</sup>H NMR (400 MHz, CDCl<sub>3</sub>) δ = 7.53 (d, *J* = 7.5 Hz, 2H), 7.48 (s, 1H), 7.34 – 7.28 (m, 3H), 7.19 – 7.14 (m, 2H), 7.09 (t, *J* = 7.4 Hz, 1H), 2.40 (s, 3H). <sup>13</sup>C NMR (100 MHz, CDCl<sub>3</sub>) δ = 167.1, 138.6, 137.8, 136.1, 134.8, 131.2, 129.2, 128.0, 126.0, 124.8, 120.0, 19.8. M.P.: 165 – 166 °C.

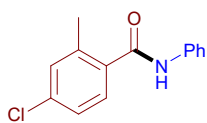

**Product 3ra (known compound, CAS:70021-83-9)<sup>[8]</sup>**

The crude product was purified by column chromatography (SiO<sub>2</sub>, petroleum ether/ethyl acetate = 20:1 to 10:1), yielding **3ra** as a white solid (28.5 mg, 58% yield). <sup>1</sup>H NMR (400 MHz, CDCl<sub>3</sub>) δ = 8.39 (s, 1H), 8.08 (s, 1H), 7.96 – 7.91 (m, 4H), 7.73 (d, *J* = 7.9 Hz, 2H), 7.64 – 7.56 (m, 2H), 7.42 (t, *J* = 7.8 Hz, 2H), 7.20 (t, *J* = 7.4 Hz, 1H). <sup>13</sup>C NMR (100 MHz, CDCl<sub>3</sub>) δ = 165.8, 138.0, 134.9, 132.6, 132.4, 129.2, 129.0, 128.8, 127.92, 127.83, 127.5, 127.0, 124.6, 123.6, 120.3. M.P.: 165 – 167 °C.

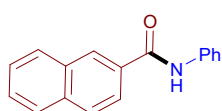

**Product 3sa**

The crude product was purified by column chromatography (SiO<sub>2</sub>, petroleum ether/ethyl acetate = 20:1 to 10:1), yielding **3sa** as a white solid (46 mg, 87% yield). <sup>1</sup>H NMR (400 MHz, CDCl<sub>3</sub>) δ = 7.54 (d, *J* = 7.8 Hz, 2H), 7.39 (s, 1H), 7.29 (t, *J* = 7.8 Hz, 2H), 7.19 (s, 1H), 7.09 (d, *J* = 7.7 Hz, 3H), 2.87 (s, 2H), 2.75 (s, 2H), 1.74 – 1.71 (m, 4H). <sup>13</sup>C NMR (100 MHz, CDCl<sub>3</sub>) δ = 168.6, 138.8, 135.9, 134.6, 132.3, 131.3, 129.1, 125.4, 125.4, 124.2, 123.8, 119.8, 29.8, 27.0, 22.8, 22.5. M.P.: 136.5 – 138.5 °C. HRMS (ESI-TOF) *m/z*: [M+H]<sup>+</sup> calcd for C<sub>17</sub>H<sub>18</sub>Cl<sub>2</sub>NO<sub>2</sub>: 252.1383; found: 252.1381.

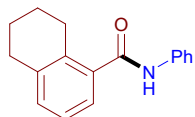

**Product 3ta (known compound, CAS:1914890-72-4)<sup>[16]</sup>**

The crude product was purified by column chromatography (SiO<sub>2</sub>, petroleum ether/ethyl acetate = 20:1 to 10:1), yielding **3ta** as a white solid (36.6 mg, 74 % yield). <sup>1</sup>H NMR (400 MHz, CDCl<sub>3</sub>) δ = 9.21 (s, 1H), 8.51 (d, *J* = 6.0 Hz, 1H), 8.13 (d, *J* = 6.0 Hz, 1H), 8.02 (d, *J* = 8.2 Hz, 1H), 7.91 (d, *J* = 7.0 Hz, 1H), 7.84 (s, 1H), 7.65 – 7.55 (m, 3H), 7.35 (t, *J* = 7.7 Hz, 2H), 7.17 – 7.11 (m, 1H). <sup>13</sup>C NMR (101 MHz, CDCl<sub>3</sub>) δ = 166.1, 152.8, 144.3, 137.9, 133.2, 133.0, 130.7, 129.2, 128.6, 126.2, 125.0, 120.1, 118.0. M.P.: 166 – 168 °C.

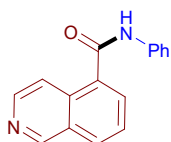

**Product 3ua (known compound, CAS:70608-29-6)<sup>[17]</sup>**

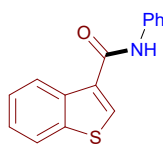

The crude product was purified by column chromatography (SiO<sub>2</sub>, petroleum ether/ethyl acetate = 20:1 to 10:1), yielding **3ua** as a white solid (43.1 mg, 85% yield). <sup>1</sup>H NMR (400 MHz, CDCl<sub>3</sub>) δ = 8.41 (d, *J* = 7.9 Hz, 1H), 7.98 (s, 1H), 7.89 (d, *J* = 7.9 Hz, 1H), 7.81 (s, 1H), 7.65 (d, *J* = 8.0 Hz, 2H), 7.49 – 7.35 (m, 4H), 7.17 (t, *J* = 7.3 Hz, 1H). <sup>13</sup>C NMR (100 MHz, CDCl<sub>3</sub>) δ = 162.1, 140.3, 137.7, 136.7, 132.4, 129.6, 129.2, 125.4, 124.7, 124.3, 122.6, 120.3. M.P.: 172 – 174 °C.

**Product 3va (known compound, CAS:39167-76-5)<sup>[18]</sup>**

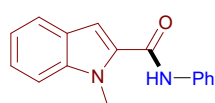

The crude product was purified by column chromatography (SiO<sub>2</sub>, petroleum ether/ethyl acetate = 20:1 to 10:1), yielding **3va** as a white solid (37.4 mg, 50% yield). <sup>1</sup>H NMR (400 MHz, CDCl<sub>3</sub>) δ = 7.97 (s, 1H), 7.67 – 7.61 (m, 3H), 7.42 – 7.34 (m, 4H), 7.20 – 7.15 (m, 2H), 6.98 (s, 1H), 4.07 (s, 3H). <sup>13</sup>C NMR (100 MHz, CDCl<sub>3</sub>) δ = 160.6, 139.4, 137.8, 132.0, 129.2, 126.0, 124.57, 124.52, 122.0, 120.8, 120.1, 110.3, 104.4, 31.6. M.P.: 170 – 172 °C.

**Product 3wa (known compound, CAS:6625-74-7)<sup>[10]</sup>**

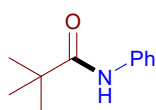

The crude product was purified by column chromatography (SiO<sub>2</sub>, petroleum ether/ethyl acetate = 20:1 to 10:1), yielding **3wa** as a white solid (24.5 mg, 69 %). <sup>1</sup>H NMR (400 MHz, CDCl<sub>3</sub>) δ = 7.55 – 7.50 (m, 2H), 7.32 (t, *J* = 7.8 Hz, 3H), 7.10 (t, *J* = 7.5 Hz, 1H), 1.32 (s, 9H). <sup>13</sup>C NMR (100 MHz, CDCl<sub>3</sub>) δ = 176.6, 138.0, 129.0, 124.2, 120.7, 39.6, 27.6. M.P.: 133 – 135 °C.

**Product 3xa (known compound, CAS:2719-26-8)<sup>[19]</sup>**

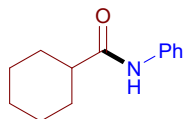

The crude product was purified by column chromatography (SiO<sub>2</sub>, petroleum ether/ethyl acetate = 20:1 to 10:1), yielding **3xa** as a white solid (46 mg, 87% yield). <sup>1</sup>H NMR (400 MHz, CDCl<sub>3</sub>) δ = 7.52 (d, *J* = 7.8 Hz, 2H), 7.31 (t, *J* = 7.8 Hz, 2H), 7.18 – 7.05 (m, 2H), 2.25 – 2.19 (m, 1H), 1.96 (d, *J* = 13.0 Hz, 2H), 1.86 – 1.83 (m, 2H), 1.72 – 1.69 (m, 1H), 1.56 – 1.50 (m, 1H), 1.36 – 1.24 (m, 4H). <sup>13</sup>C NMR (100 MHz, CDCl<sub>3</sub>) δ = 174.2, 138.1, 129.0, 124.1, 119.7, 46.6, 29.7, 25.7 (overlap). M.P.: 132 – 134 °C.

**Product 3ya (known compound, CAS:79455-25-7)<sup>[20]</sup>**

The crude product was purified by column chromatography (SiO<sub>2</sub>, petroleum ether/ethyl acetate = 20:1 to 10:1), yielding **3ya** as a white solid (50.3 mg, 99% yield). <sup>1</sup>H NMR (400 MHz, CDCl<sub>3</sub>) δ = 7.51 (d, *J* = 8.0 Hz, 3H), 7.33 – 7.27 (m, 4H), 7.21 (t, *J* = 7.2 Hz, 1H), 7.11 (d, *J* = 7.4 Hz, 3H), 2.58 (dd, *J* = 13.1, 6.4 Hz, 1H), 1.73 (d, *J* = 6.3 Hz, 2H), 1.38 – 1.34 (m, 1H). <sup>13</sup>C NMR (100 MHz, CDCl<sub>3</sub>) δ = 170.2, 140.5, 138.0, 129.0, 128.5, 126.5, 126.1, 124.2, 119.7, 27.8, 25.9, 16.4. M.P.: 180 – 182 °C.

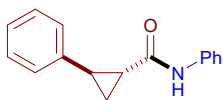

**Product 3za (known compound, CAS: 58265-36-4)<sup>[21]</sup>**

The crude product was purified by column chromatography (SiO<sub>2</sub>, petroleum ether/ethyl acetate = 20:1 to 10:1), yielding **3za** as a white solid (31 mg, 65% yield). <sup>1</sup>H NMR (400 MHz, CDCl<sub>3</sub>) δ = 7.46 – 7.39 (m, 4H), 7.37 – 7.30 (m, 3H), 7.27 (d, *J* = 7.6 Hz, 2H), 7.06 (t, *J* = 7.1 Hz, 1H), 6.79 (s, 1H), 1.67 (s, 6H). <sup>13</sup>C NMR (100 MHz, CDCl<sub>3</sub>) δ = 175.6, 144.6, 138.0, 129.0, 128.9, 127.4, 126.5, 124.1, 119.6, 48.1, 27.0. M.P.: 171 – 172 °C.

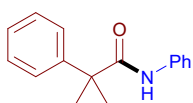

**Product 4 (known compound, CAS:3796-79-0)<sup>[8]</sup>**

The crude product was purified by column chromatography (SiO<sub>2</sub>, petroleum ether/ethyl acetate = 20:1 to 10:1), yielding **4** as a white solid (39.8 mg, 78% yield). <sup>1</sup>H NMR (400 MHz, CDCl<sub>3</sub>) δ = 7.54 (d, *J* = 7.7 Hz, 2H), 7.32 (t, *J* = 7.1 Hz, 3H), 7.10 (t, *J* = 7.1 Hz, 1H), 2.11 (s, 3H), 1.97 (s, 6H), 1.80 – 1.73 (m, 6H). <sup>13</sup>C NMR (100 MHz, CDCl<sub>3</sub>) δ = 176.1, 138.0, 129.0, 124.1, 120.0, 41.5, 39.3, 36.4, 28.1. M.P.: 144 – 146 °C.

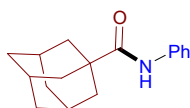

**Product 5 (known compound, CAS:54200-39-4)<sup>[6]</sup>**

The crude product was purified by column chromatography (SiO<sub>2</sub>, petroleum ether/ethyl acetate = 20:1 to 10:1), yielding **5** as a yellow solid (38.7 mg, 71% yield). <sup>1</sup>H NMR (400 MHz, CDCl<sub>3</sub>) δ = 8.16 (s, 1H), 7.59 (d, *J* = 7.9 Hz, 2H), 7.35 (t, *J* = 7.8 Hz, 2H), 7.16 (t, *J* = 7.3 Hz, 1H), 2.65 – 2.57 (m, 1H), 2.04 – 1.97 (m, 2H), 1.78 – 1.72 (m, 1H), 1.16 (d, *J* = 9.1 Hz, 6H), 0.99 (s, 3H). <sup>13</sup>C NMR (100 MHz, CDCl<sub>3</sub>) δ = 178.0, 165.2, 136.8, 129.1, 125.0, 120.0, 92.4, 55.5, 54.4, 30.5, 29.1, 16.8, 16.6, 9.7. M.P.: 98 – 100 °C.

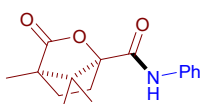

**Product 3ab (known compound, CAS: 58249-89-1)<sup>[4]</sup>**

The crude product was purified by column chromatography (SiO<sub>2</sub>, petroleum ether/ethyl acetate = 20:1 to 10:1), yielding **3ab** as a white solid (28.1 mg, 62%). <sup>1</sup>H NMR (400 MHz, CDCl<sub>3</sub>) δ = 7.51 – 7.44 (m, 4H), 7.35 (t, *J* = 7.4 Hz, 1H), 7.28 – 7.24 (m, 2H), 7.17 (d, *J* = 7.9 Hz, 2H), 2.50 (s, 3H), 2.34 (s, 3H). <sup>13</sup>C NMR (100 MHz, CDCl<sub>3</sub>) δ = 168.0, 136.6, 136.4, 135.4, 134.2, 131.2, 130.2, 129.6, 126.6, 125.9, 120.0, 20.9, 19.8. M.P.: 140 – 142 °C.

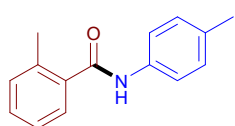

**Product 3ac (known compound, CAS: 65492-63-9)<sup>[4]</sup>**

The crude product was purified by column chromatography (SiO<sub>2</sub>, petroleum ether/ethyl acetate = 20:1 to 10:1), yielding **3ac** as a white solid (16.7 mg, 34%). <sup>1</sup>H NMR (400 MHz, CDCl<sub>3</sub>) δ = 7.63 (s, 1H), 7.56 (d, *J* = 8.2 Hz, 2H), 7.44 (d, *J* = 7.4 Hz, 1H), 7.36 (t, *J* = 7.5 Hz, 1H), 7.31 (d, *J* = 8.6 Hz, 2H), 7.27 – 7.21 (m, 2H), 2.47 (s, 3H). <sup>13</sup>C NMR (100 MHz, CDCl<sub>3</sub>) δ = 168.1, 136.6, 136.5, 136.0, 131.4, 130.5, 129.5, 129.1, 126.6, 126.0, 121.2, 19.8. M.P.: 128 – 130 °C.

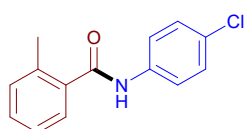

**Product 3ad (known compound, CAS: 708248-47-9)<sup>[10]</sup>**

The crude product was purified by column chromatography (SiO<sub>2</sub>, petroleum ether/ethyl acetate = 20:1 to 10:1), yielding **3ad** as a white solid (16.7 mg, 34%). <sup>1</sup>H NMR (400 MHz, CDCl<sub>3</sub>) δ = 7.92 (s, 1H), 7.83 (d, *J* = 7.6 Hz, 1H), 7.65 (s, 1H), 7.48 (d, *J* = 7.7 Hz, 2H), 7.39 (dd, *J* = 13.3, 7.3 Hz, 2H), 7.30 – 7.26 (m, 2H), 2.51 (s, 3H). <sup>13</sup>C NMR (100 MHz, CDCl<sub>3</sub>) δ = 168.2, 138.5, 136.6, 135.8, 131.5, 130.7, 129.7, 126.6, 126.0, 122.9, 121.11, 121.07, 116.6, 19.9. <sup>19</sup>F NMR (376 MHz, CDCl<sub>3</sub>) δ = -62.67. M.P.: 115 – 117 °C.

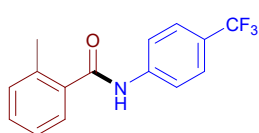

**Product 6aa (known compound, CAS: 2180449-13-0)<sup>[22]</sup>**

The crude product was purified by column chromatography (SiO<sub>2</sub>, petroleum ether/ethyl acetate = 15:1 to 5:1), yielding **6aa** as a white solid (52.5 mg, 60 %). <sup>1</sup>H NMR (400 MHz, CDCl<sub>3</sub>) δ = 8.59 (s, 1H), 7.62 (d, *J* = 8.3 Hz, 2H), 7.57 (d, *J* = 8.0 Hz, 2H), 7.33 (t, *J* = 7.6 Hz, 4H), 7.14 (d, *J* = 7.9 Hz, 3H), 6.93 (d, *J* = 8.3 Hz, 2H), 6.37 (t, *J* = 5.9 Hz, 1H), 3.68 – 3.63 (m, 2H), 2.88 (t, *J* = 7.0 Hz, 2H), 1.56 (s, 6H). <sup>13</sup>C NMR (100 MHz, CDCl<sub>3</sub>) δ = 173.0, 166.5, 152.7, 137.7, 137.5, 134.3, 133.0, 129.7, 129.1, 128.8, 128.3, 124.5, 122.0, 119.8, 82.0, 41.3, 34.9, 25.0. M.P.: 138 – 139 °C.

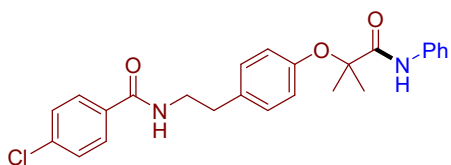

**Product 6ba (known compound, CAS: 136772-55-9)<sup>[22]</sup>**

The crude product was purified by column chromatography (SiO<sub>2</sub>, petroleum ether/ethyl acetate = 15:1 to 5:1), yielding **6ba** as a white solid (23.4 mg, 36 %). <sup>1</sup>H NMR (400 MHz, CDCl<sub>3</sub>) δ = 7.51 (d, *J* = 7.9 Hz, 2H), 7.36 – 7.29 (m, 3H), 7.11 (t, *J* = 7.4 Hz, 1H), 7.00 (d, *J* = 7.4 Hz, 1H), 6.66 (d, *J* = 7.5 Hz, 1H), 6.60 (s, 1H), 3.94 (s, 2H), 2.29 (s, 3H), 2.17 (s, 3H), 1.82 (s, 4H), 1.34 (s, 6H). <sup>13</sup>C NMR (100 MHz, CDCl<sub>3</sub>) δ = 175.6, 156.9, 137.9, 136.6, 130.3, 129.0, 124.3, 123.6, 120.9, 120.1, 112.2, 67.9, 42.8, 37.8, 25.6, 25.2, 21.4, 15.8. M.P.: 108 – 110 °C.

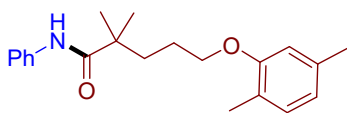

**Product 6ca (known compound, CAS: 190125-59-8)<sup>[23]</sup>**

The crude product was purified by column chromatography (SiO<sub>2</sub>, petroleum ether/ethyl acetate = 15:1 to 5:1), yielding **6ca** as a white solid (30.8 mg, 48 %). <sup>1</sup>H NMR (400 MHz, CDCl<sub>3</sub>) δ = 7.54 (d, *J* = 7.4 Hz, 2H), 7.52 – 7.41 (m, 5H), 7.38 (t, *J* = 7.3 Hz, 1H), 7.30 (t, *J* = 7.8 Hz, 3H), 7.22 – 7.13 (m, 2H), 7.10 (t, *J* = 7.4 Hz, 1H), 3.76 – 3.71 (m, 1H), 1.62 (s, 3H). <sup>13</sup>C NMR (100 MHz, CDCl<sub>3</sub>) δ = 171.5, 161.2, 158.7, 142.3 (d, *J* = 7.4 Hz), 137.7, 135.3, 131.3 (d, *J* = 4.0 Hz), 129.00, 128.9 (d, *J* = 2.9 Hz), 128.5, 127.8, 124.5, 123.6 (d, *J* = 3.3 Hz), 119.8, 115.5 (d, *J* = 23.3 Hz), 47.7, 18.6. <sup>19</sup>F NMR (376 MHz, CDCl<sub>3</sub>) δ = -116.71. M.P.: 168 – 170 °C.

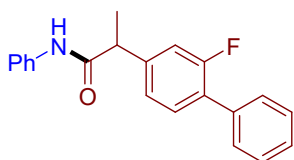

**Product 6da (known compound, CAS: 2644046-41-1)<sup>[16]</sup>**

The crude product was purified by column chromatography (SiO<sub>2</sub>, petroleum ether/ethyl acetate = 15:1 to 5:1), yielding **6da** as a white solid (32 mg, 33% yield). <sup>1</sup>H NMR (400 MHz, CDCl<sub>3</sub>) δ = 7.78 (s, 1H), 7.52 (d, *J* = 7.9 Hz, 2H), 7.29 (t, *J* = 7.0 Hz, 2H), 7.08 (t, *J* = 7.4 Hz, 1H), 2.95 – 2.81 (m, 3H), 2.43 (ddd, *J* = 18.2, 9.1, 4.7 Hz, 2H), 2.32 (td, *J* = 14.2, 5.7 Hz, 4H), 2.26 – 2.07 (m, 5H), 1.99 (dd, *J* = 30.6, 14.1 Hz, 6H), 1.83 (dt, *J* = 11.3, 5.6 Hz, 1H), 1.62 (dd, *J* = 14.6, 4.4 Hz, 1H), 1.39 (s, 5H), 1.06 (s, 3H), 0.86 (d, *J* = 6.6 Hz, 3H). <sup>13</sup>C NMR (100 MHz, CDCl<sub>3</sub>) δ = 212.3, 209.4, 209.1, 171.9, 138.2, 128.9, 124.0, 119.80, 56.9, 51.8, 49.0, 46.8, 45.4, 45.4, 45.0, 42.8, 38.7, 36.5, 36.0, 35.34, 35.24, 34.2, 30.8, 27.6, 25.2, 21.9, 18.8, 11.9. M.P.: 118 – 120 °C.

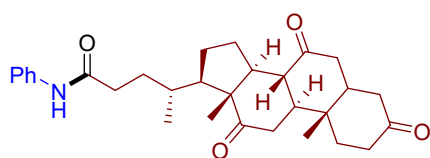

## Product 6ea

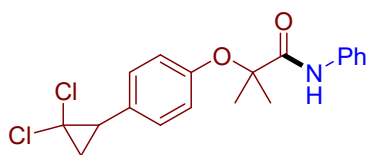

The crude product was purified by column chromatography (SiO<sub>2</sub>, petroleum ether/ethyl acetate = 15:1 to 5:1), yielding **6ea** as a white solid (50 mg, 66%). <sup>1</sup>H NMR (400 MHz, CDCl<sub>3</sub>) δ = 8.56 (s, 1H), 7.58 (d, *J* = 7.9 Hz, 2H), 7.35 (t, *J* = 7.8 Hz, 2H), 7.21 – 7.11 (m, 3H), 6.98 (d, *J* = 8.4 Hz, 2H), 2.91 – 2.83 (m, 1H), 1.97 (dd, *J* = 10.7, 7.4 Hz, 1H), 1.81 (t, *J* = 7.9 Hz, 1H), 1.59 (s, 6H). <sup>13</sup>C NMR (100 MHz, CDCl<sub>3</sub>) δ = 172.8, 153.4, 137.5, 130.2, 130.0, 129.1, 124.5, 121.6, 119.9, 82.2, 60.7, 34.8, 25.9, 25.05, 25.01 M.P.: 136.0 – 139.0 °C. HRMS (ESI-TOF) *m/z*: [M+Na]<sup>+</sup> calcd for C<sub>19</sub>H<sub>19</sub>Cl<sub>2</sub>NO<sub>2</sub>Na: 386.0685; found: 386.0680.

## Product 6fa (known compound, CAS: 2644046-40-0)<sup>[24]</sup>

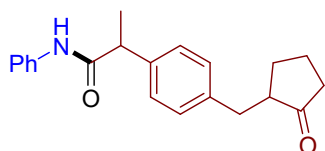

The crude product was purified by column chromatography (SiO<sub>2</sub>, petroleum ether/ethyl acetate = 15:1 to 5:1), yielding **6fa** as a white solid (24.1 mg, 37% yield). <sup>1</sup>H NMR (400 MHz, CDCl<sub>3</sub>) δ = 7.45 (d, *J* = 8.0 Hz, 2H), 7.33 – 7.24 (m, 5H), 7.18 (d, *J* = 7.8 Hz, 2H), 7.08 (t, *J* = 7.4 Hz, 1H), 3.73 – 3.68 (m, 1H), 3.15 (dd, *J* = 13.9, 4.1 Hz, 1H), 2.57 – 2.54 (m, 1H), 2.42 – 2.29 (m, 2H), 2.17 – 2.06 (m, 2H), 2.02 – 1.94 (m, 1H), 1.79 – 1.68 (m, 1H), 1.61 – 1.50 (m, 4H). <sup>13</sup>C NMR (100 MHz, CDCl<sub>3</sub>) δ = 220.3, 172.5, 139.3, 138.8, 137.9, 129.6, 128.9, 127.8, 124.2, 119.7, 51.0, 47.7, 38.2, 35.2, 29.3, 20.6, 18.6. M.P.: 109 – 110 °C.

## 5. Gram-Scale Reaction

### Procedure for Gram-Scale Reaction

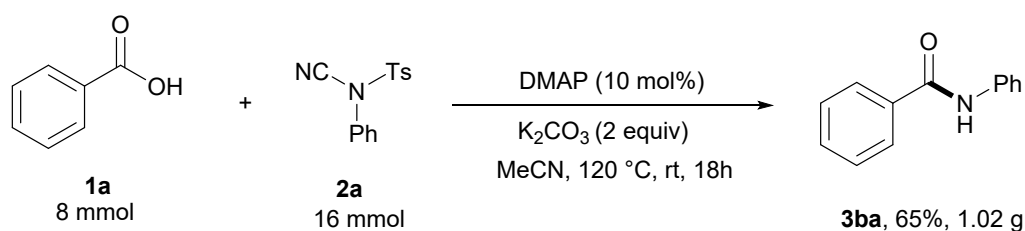

To an over dried round-bottom flask equipped with a magnetic stir bar, **1a** (8 mmol, 1.0 equiv.), carboxylic acid **2a** (16 mmol, 2.0 equiv.), K<sub>2</sub>CO<sub>3</sub> (2.21 mg, 2.0 equiv.) and DMAP (97.7 mg, 10 mol%) were added. The flask was evacuated and filled with nitrogen (3 times). After that, add the solvent (80

mL) slowly with a syringe in nitrogen atmosphere, maintaining at a temperature of 120 °C. Then the system stirred for 18 hours. The crude product was purified by flash chromatography on silica gel to afford pure product **3ba** in 65% yield (1.02 g).

## 6. Synthetic Application

### 6.1 General procedure and spectral data for preparation **10**

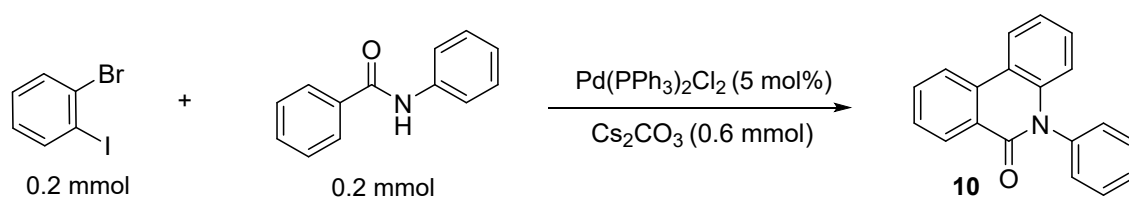

To a solution of compound 1 (1.0 eq.) and 2 (1.0 eq.) in anhydrous and oxygen free DMF (2.5 ml), was added Pd(PPh<sub>3</sub>)<sub>2</sub>Cl<sub>2</sub> (0.1 eq.) as catalyst and Cs<sub>2</sub>CO<sub>3</sub> as base and then the reaction mixture was stirred at 150 °C in a sealed tube under N<sub>2</sub>. After completion of the reaction, monitored by TLC, the reaction mixture was diluted with ethyl acetate, filtered through celite bed and then washed with cold water (4× 10 mL) and brine (2×10 mL). Thereafter, the organic layer was collected and dried over Na<sub>2</sub>SO<sub>4</sub> and was evaporated under reduced pressure to get crude solid. It was then subjected to column chromatography (silica gel 100-200 mesh size, ethyl acetate: pet ether) for further purification to get the desired compound **10** in 95% yield.

#### Product **10** (known compound, CAS:13355-65-2)<sup>[25]</sup>

yield as yellow solid (51.8 mg, 95% yield). <sup>1</sup>H NMR (400 MHz, CDCl<sub>3</sub>) δ= 8.56 (d, *J* = 8.0 Hz, 1H), 8.33

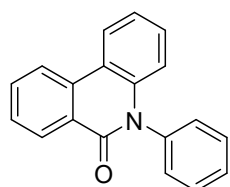

(dd, *J* = 13.7, 8.8 Hz, 2H), 7.82 (t, *J* = 7.7 Hz, 1H), 7.62 (t, *J* = 7.5 Hz, 3H), 7.54 (t, *J* = 7.4 Hz, 1H), 7.38 – 7.27 (m, 4H), 6.72 – 6.66 (m, 1H). <sup>13</sup>C NMR (100 MHz, CDCl<sub>3</sub>) δ=161.7, 139.2, 138.3, 134.0, 132.8, 130.2, 129.1, 129.1, 128.8, 128.2, 125.9, 123.0, 122.7, 121.8, 119.1, 117.0.

## 6.2 General procedure and spectral data for preparation 8

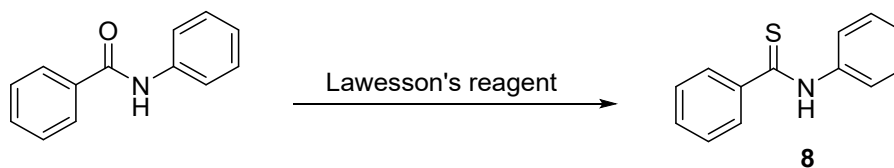

A mixture of benzamide (0.2 mmol) and Lawesson's reagent (0.1 mmol) in anhydrous and oxygen free toluene (2 mL) was heated at reflux under atmosphere of nitrogen for 2 h, after which it was concentrated, purified by column chromatography (EtOAc/hexanes 1:4) and recrystallized from hexane /ethyl acetate, yielding product **8** in 98% yield.

### Product 8 (known compound, CAS:636-04-4)<sup>[26]</sup>

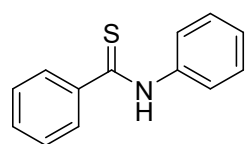

yield as a yellow solid (40.8 mg, 98% yield). <sup>1</sup>H NMR (400 MHz, CDCl<sub>3</sub>) δ= 9.05 (s, 1H), 7.79 (dd, *J* = 33.3, 7.3 Hz, 4H), 7.49 – 7.42 (m, 5H), 7.29 (t, *J* = 7.5 Hz, 1H). <sup>13</sup>C NMR (100 MHz, CDCl<sub>3</sub>) δ=198.5, 143.2, 139.1, 131.3, 129.1, 128.6, 127.0, 126.7, 123.8.

## 6.3 General procedure and spectral data for preparation 9

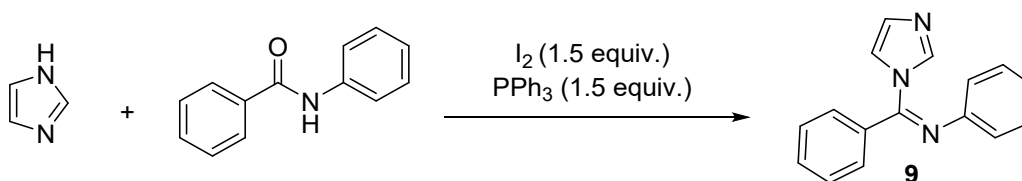

Add I<sub>2</sub> (0.42 mmol) to a solution of Ph<sub>3</sub>P (0.42 mmol) in dichloromethane (2 mL) at 0 °C under N<sub>2</sub>. Add resulting solution with amide (0.277 mmol), followed by triethylamine (1.4 mmol) to the reaction mixture at 0 °C. Stir the reaction mixture continuously at 0 °C for 1 hour. Add Et<sub>3</sub>N (0.34 mmol) to the mixture. Allow the solution to warm up to room temperature. Stir the solution until completion of the reaction. Purify the crude material by column chromatography (ethyl acetate/hexane = 1:2), yielding product **9** in 81% yield.



**Product 9 (CAS:54598-45-7)<sup>[27]</sup>**

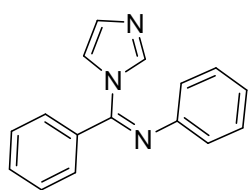

yield as a white solid (85 mg, 81% yield). <sup>1</sup>H NMR (400 MHz, CDCl<sub>3</sub>) δ= 7.84 (s, 1H), 7.56 (s, 1H), 7.41 (t, *J* = 7.3 Hz, 1H), 7.35 (t, *J* = 7.4 Hz, 2H), 7.26 (s, 2H), 7.19 – 7.14 (m, 3H), 6.98 (t, *J* = 7.4 Hz, 1H), 6.73 (d, *J* = 7.8 Hz, 2H). <sup>13</sup>C NMR (100 MHz, CDCl<sub>3</sub>) δ=151.2, 147.1, 137.5, 130.6, 130.4, 130.3, 129.4, 128.8, 128.7, 124.0, 121.4, 117.8.

**References:**

- [1] Wang, C. C.; Qu, Y. L.; Liu, X. H.; Ma, Z. W.; Yang, B.; Liu, Z. J.; Chen, X. P.; Chen, Y. J. *J. Org. Chem.* **2021**, *86*, 3546-3554.
- [2] Verma, A.; Patel, S.; Meenakshi, M.; Kumar, A.; Yadav, A.; Kumar, S.; Jana, S.; Sharma, S.; Prasad, C. D.; Kumar, S. *Chem. Commun.* **2015**, *51*, 1371-1374.
- [3] Mahajan, S.; Slathia, N.; Kapoor, K. K. *Tetrahedron Lett.* **2020**, *61*, 151859.
- [4] Nozawa-Kumada, K.; Kadokawa, J.; Kameyama, T.; Kondo, Y. *Org. Lett.* **2015**, *17*, 4479-4481.
- [5] Nozawa-Kumada, K.; Matsuzawa, Y.; Ono, K.; Shigeno, M.; Kondo, Y. *Chem. Commun.* **2021**, *57*, 8604-8607.
- [6] Fang, Y.; Tranmer, G. K. *Med. Chem. Commun.* **2016**, *7*, 720-724.
- [7] Weidmann, N.; Nishimura, R. H. V.; Knochel, P.; Harenberg, J. H. *Synthesis* **2020**, *53*, 557-568.
- [8] Joseph, D.; Park, M. S.; Lee, S. *Org. Biomol. Chem.* **2021**, *19*, 6227-6232.
- [9] Correa, A.; Martin, R. *J. Am. Chem. Soc.* **2014**, *136*, 7253-7256.
- [10] Wang, S. M.; Zhao, C.; Zhang, X.; Qin, H. L. *Org. Biomol. Chem.* **2019**, *17*, 4087-4101.
- [11] Zand, Z.; Kazemi, F.; Partovi, A. *Journal of Photochemistry and Photobiology B: Biology* **2015**, *152*, 58-62.
- [12] Ueda, S.; Nagasawa, H. *J. Org. Chem.* **2009**, *74*, 4272-4277.
- [13] Wu, G.; Li, Y.; Yu, X.; Gao, Y.; Chen, H. *Adv. Synth. Catal.* **2016**, *359*, 687-692.
- [14] Bhakuni, B. S.; Kumar, A.; Balkrishna, S. J.; Sheikh, J. A.; Konar, S.; Kumar, S. *Org. Lett.* **2012**, *14*, 2838-2841.
- [15] Liu, H.; Deng, X.; Huang, X.; Ji, N.; He, W. *Org. Biomol. Chem.* **2020**, *18*, 3654-3658.
- [16] Ning, Y.; Wang, S.; Li, M.; Han, J.; Zhu, C.; Xie, J. *Nat. Commun.* **2021**, *12*, 4637.
- [17] Antonow, D.; Marrafa, T.; Dawood, I.; Ahmed, T.; Haque, M. R.; Thurston, D. E.; Zinzalla, G. *Chem. Commun.* **2010**, *46*, 2289.
- [18] Tulichala, R. N. P.; Shankar, M.; Swamy, K. C. K. *J. Org. Chem.* **2018**, *83*, 4375-4383.
- [19] Zhou, Z.; Kweon, J.; Jung, H.; Kim, D.; Seo, S.; Chang, S. *J. Am. Chem. Soc.* **2022**, *144*, 9161-9171.
- [20] Yang, H. Y.; Yao, Y. H.; Chen, M.; Ren, Z. H.; Guan, Z. H. *J. Am. Chem. Soc.* **2021**, *143*, 7298-7305.

- [21] Li, G.; Szostak, M. *Nat. Commun.* **2018**, *9*, 4165.
- [22] Wang, X.; Chen, Z.; Liu, Q.; Lin, W.; Xiong, X. *Chem. Commun.* **2022**, *58*, 13325-13328.
- [23] Yao, Y. H.; Yang, H. Y.; Chen, M.; Wu, F.; Xu, X. X.; Guan, Z. H. *J. Am. Chem. Soc.* **2020**, *143*, 85-91.
- [24] Zhang, J.; Hou, Y. X.; Tang, Y. L.; Xu, J. H.; Liu, Z. K.; Gao, Y.; Hu, X.-Q. *Org. Chem. Front.* **2021**, *8*, 3434-3439.
- [25] Usami, K.; Yamaguchi, E.; Tada, N.; Itoh, A. *Eur. J. Org. Chem.* **2019**, *2020*, 1496-1504.
- [26] Qiao, M.; Zhang, J.; Chen, L.; Zhou, F.; Zhang, Y.; Zhou, L.; Wu, Y. *Org. Biomol. Chem.* **2019**, *17*, 3790-3796.
- [27] Phakhodee, W.; Wangngae, S.; Wiriya, N.; Pattarawarapan, M. *Tetrahedron Lett.* **2016**, *57*, 5351-5354.

## 7. NMR Spectra of products 3-5, 6aa-6fa, 8-10

$^1\text{H}$  NMR (400 MHz,  $\text{CDCl}_3$ ),  $^{13}\text{C}$  NMR (100 MHz,  $\text{CDCl}_3$ ) of product 3aa

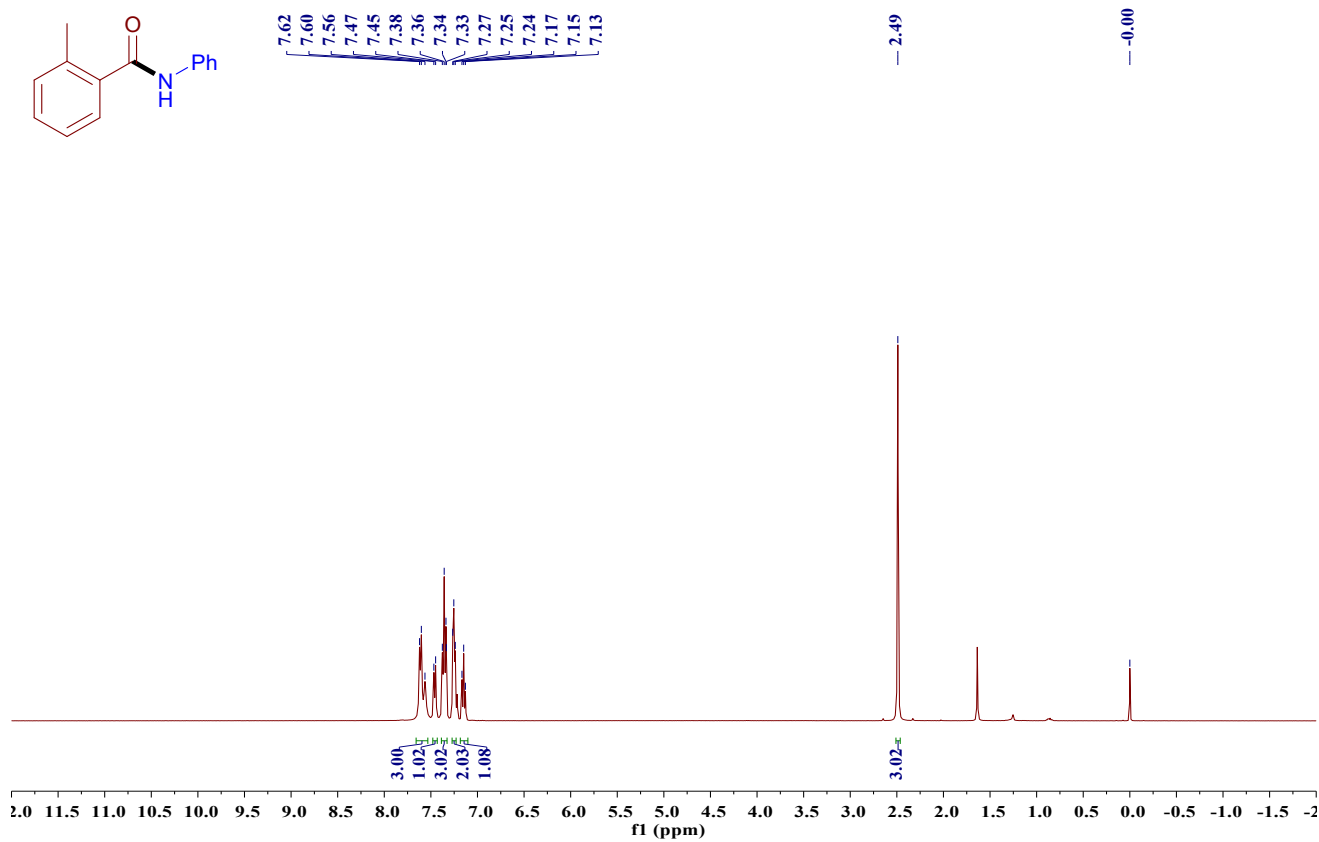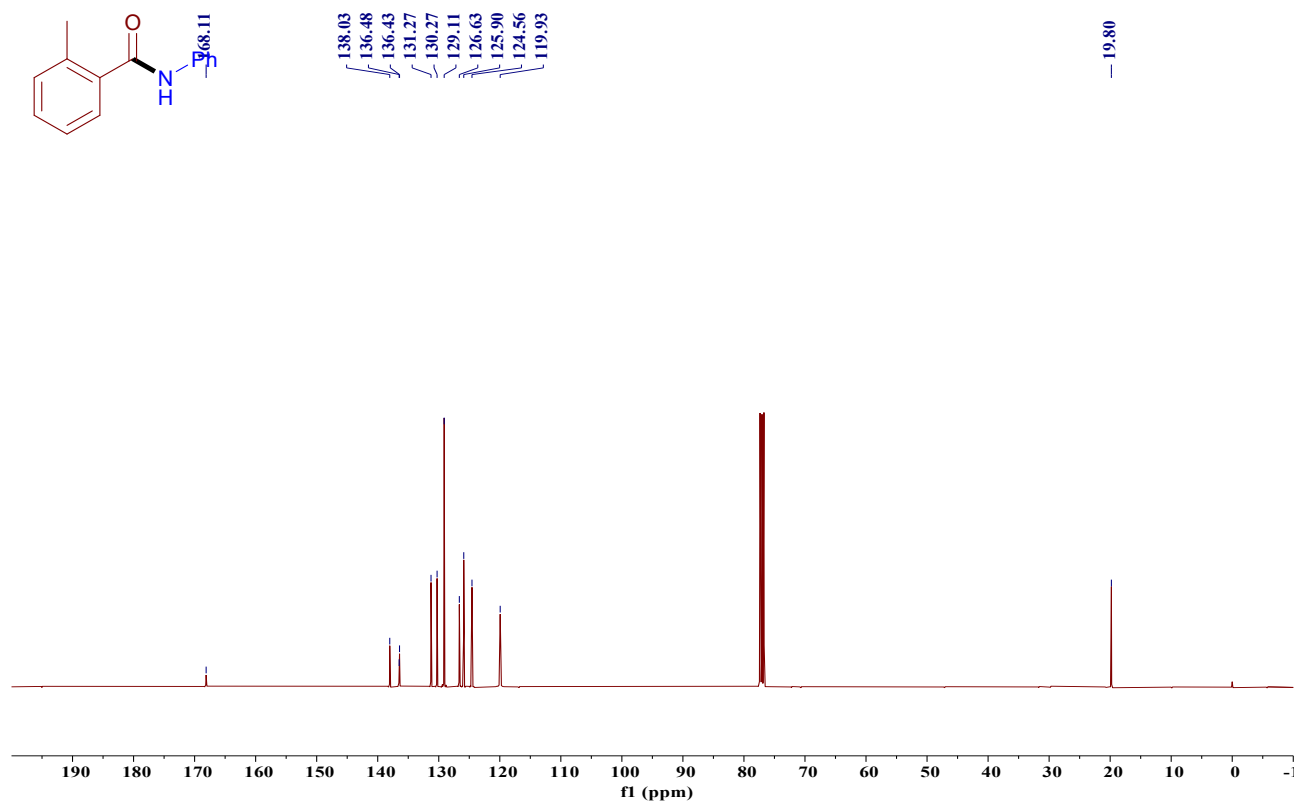

$^1\text{H}$  NMR (400 MHz,  $\text{CDCl}_3$ ),  $^{13}\text{C}$  NMR (100 MHz,  $\text{CDCl}_3$ ) of product 3ba

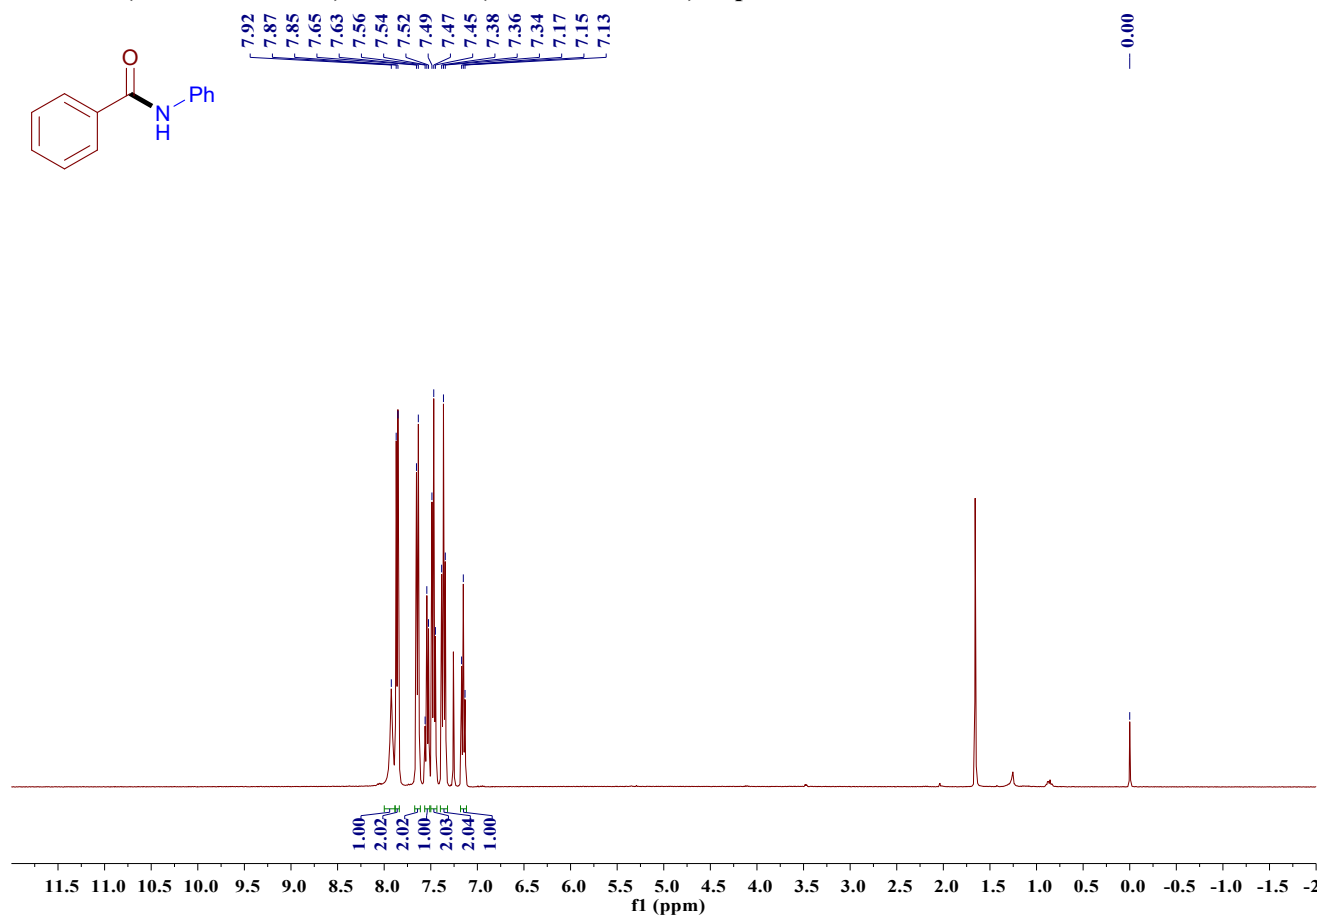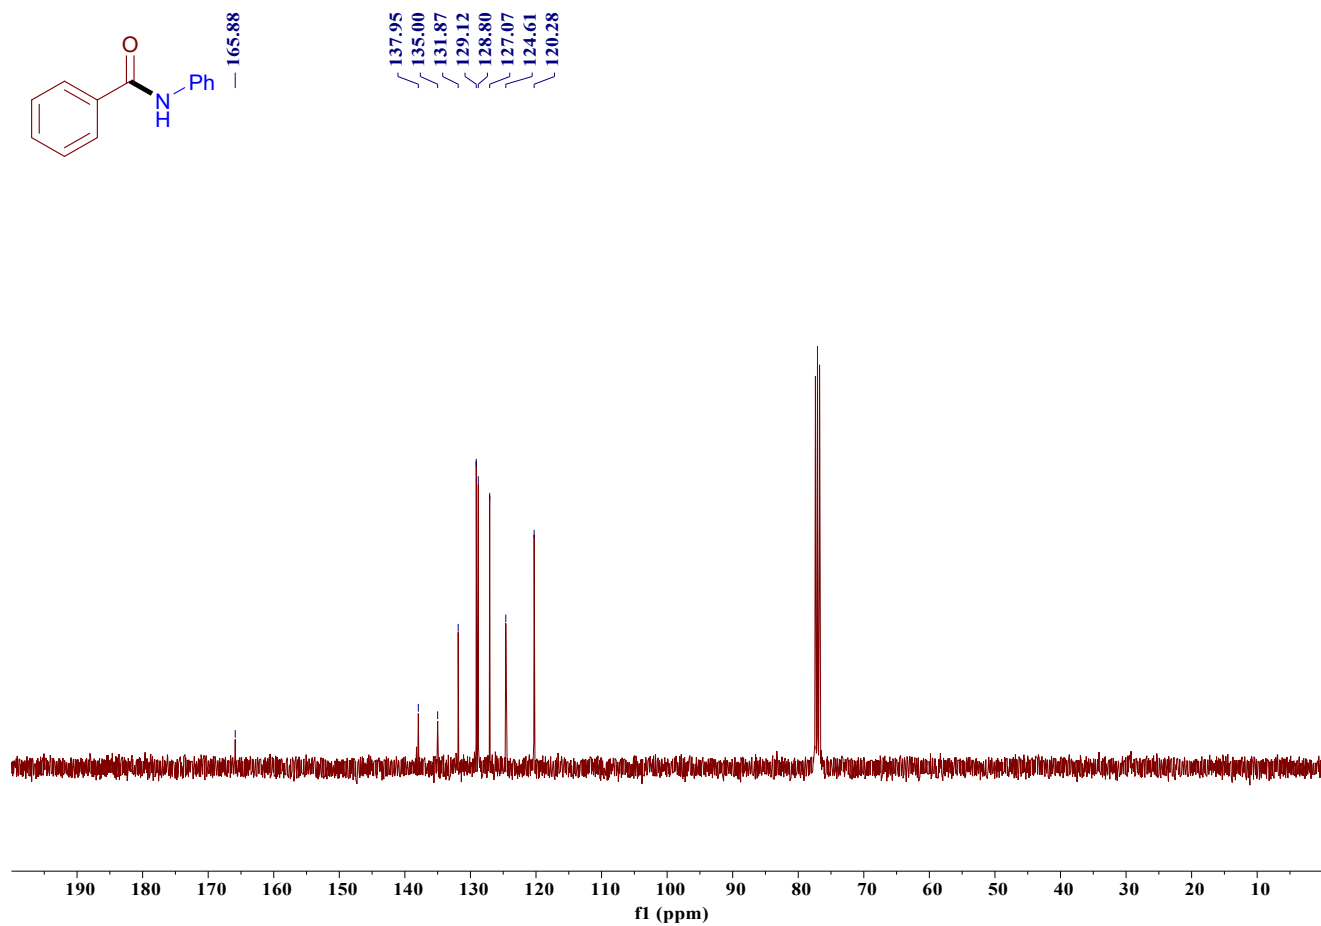

$^1\text{H}$  NMR (400 MHz,  $\text{CDCl}_3$ ),  $^{13}\text{C}$  NMR (100 MHz,  $\text{CDCl}_3$ ) of product 3ea

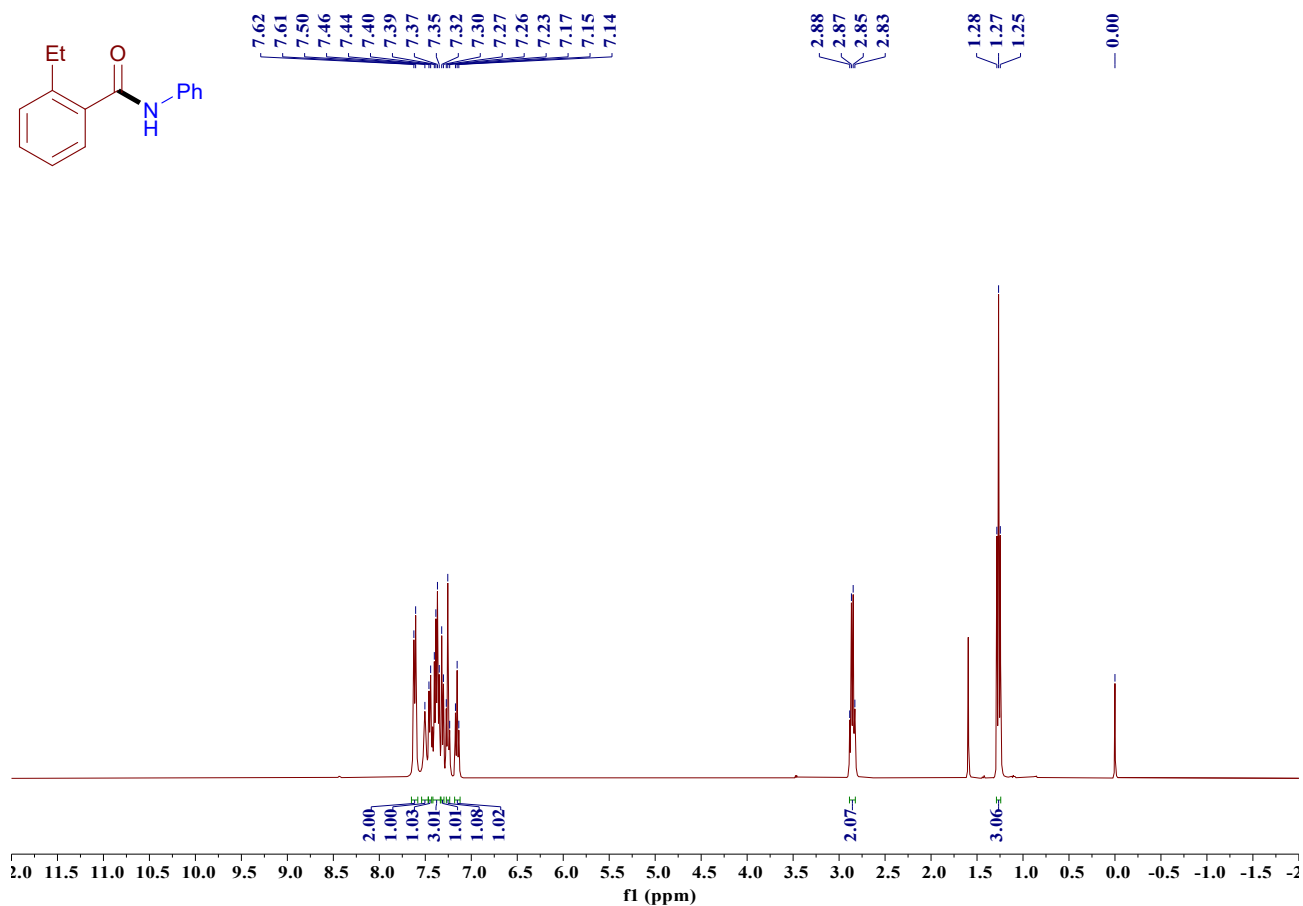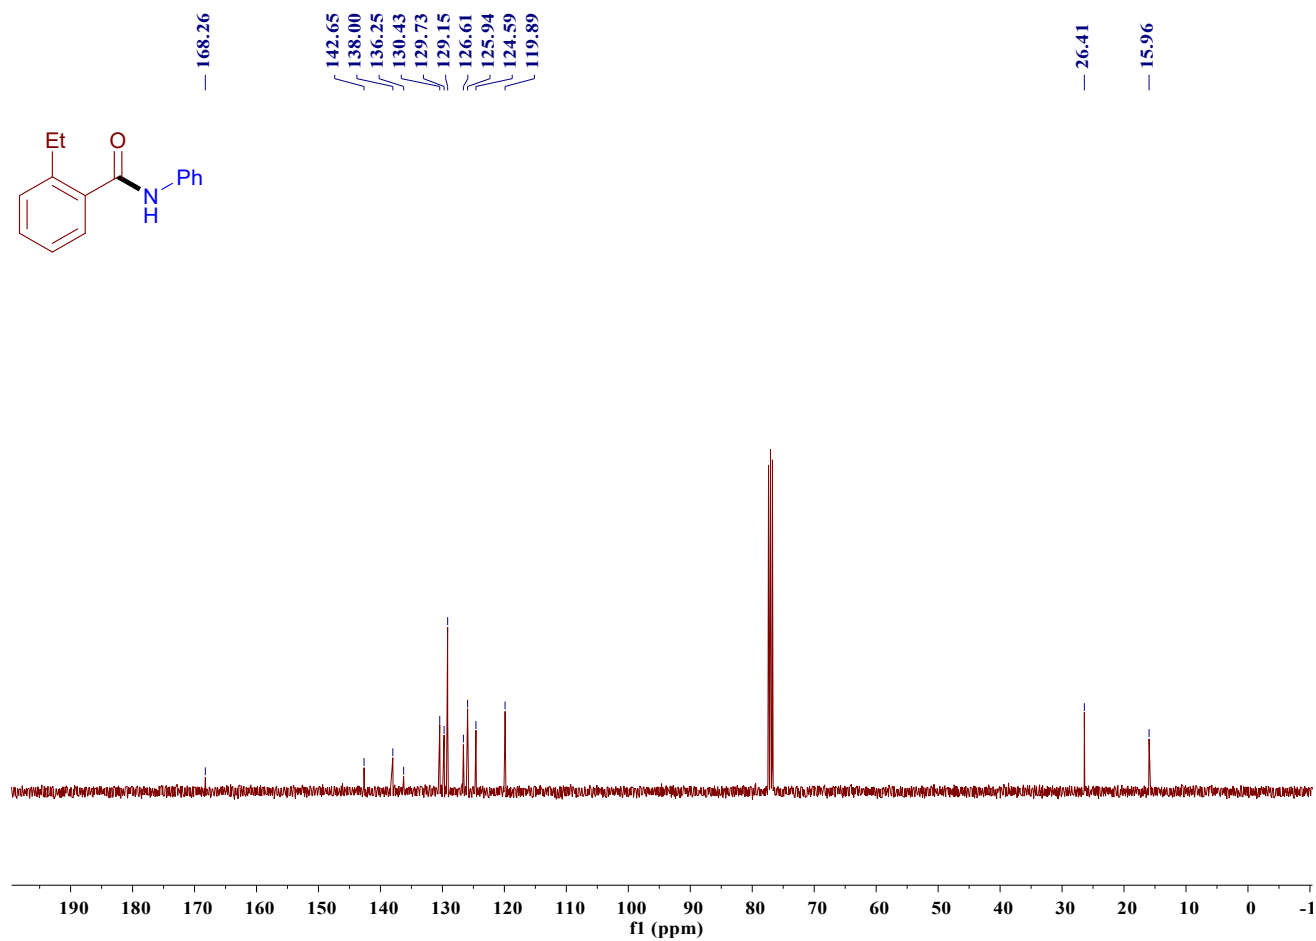

$^1\text{H}$  NMR (400 MHz,  $\text{CDCl}_3$ ),  $^{13}\text{C}$  NMR (100 MHz,  $\text{CDCl}_3$ ) of product 3da

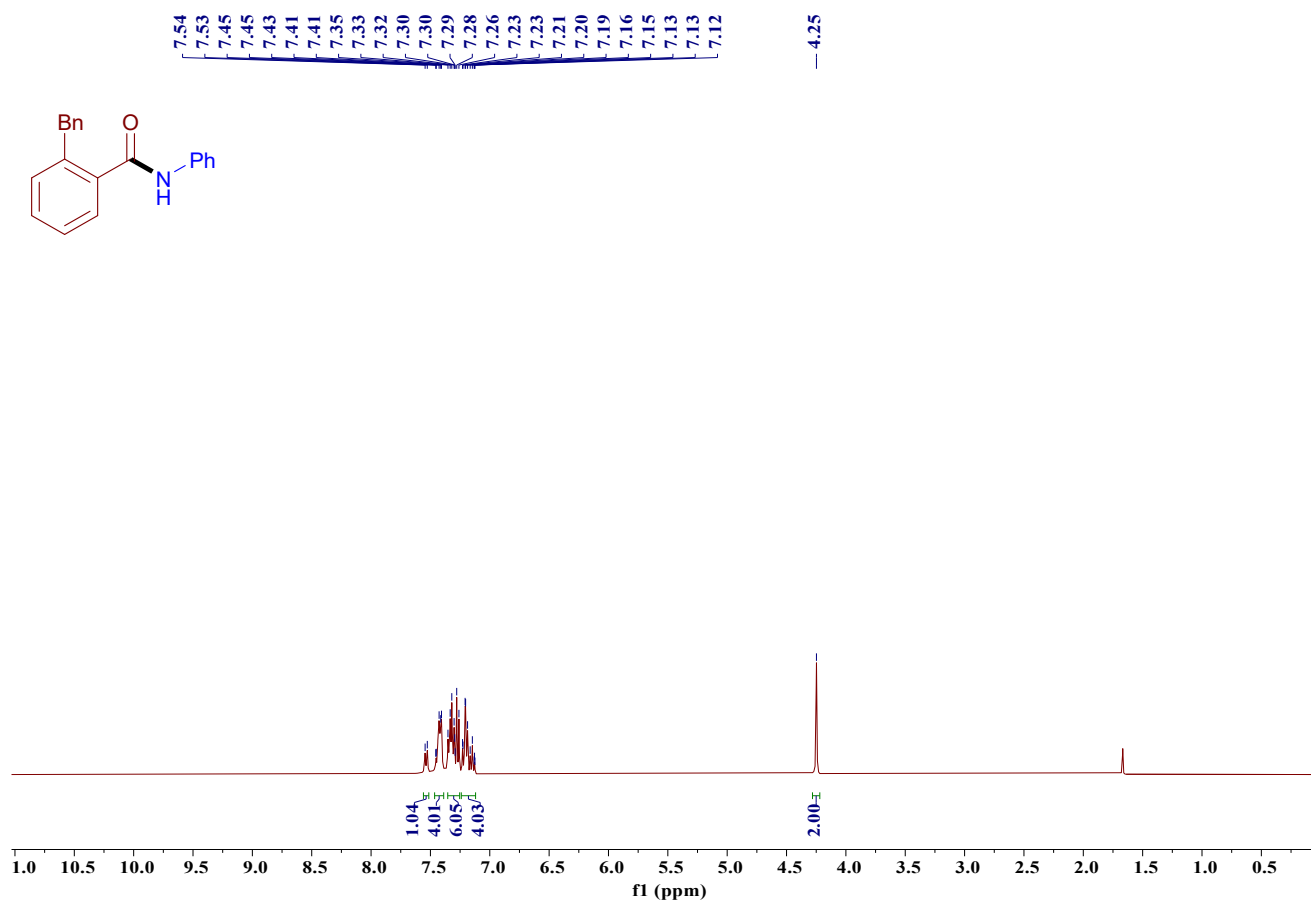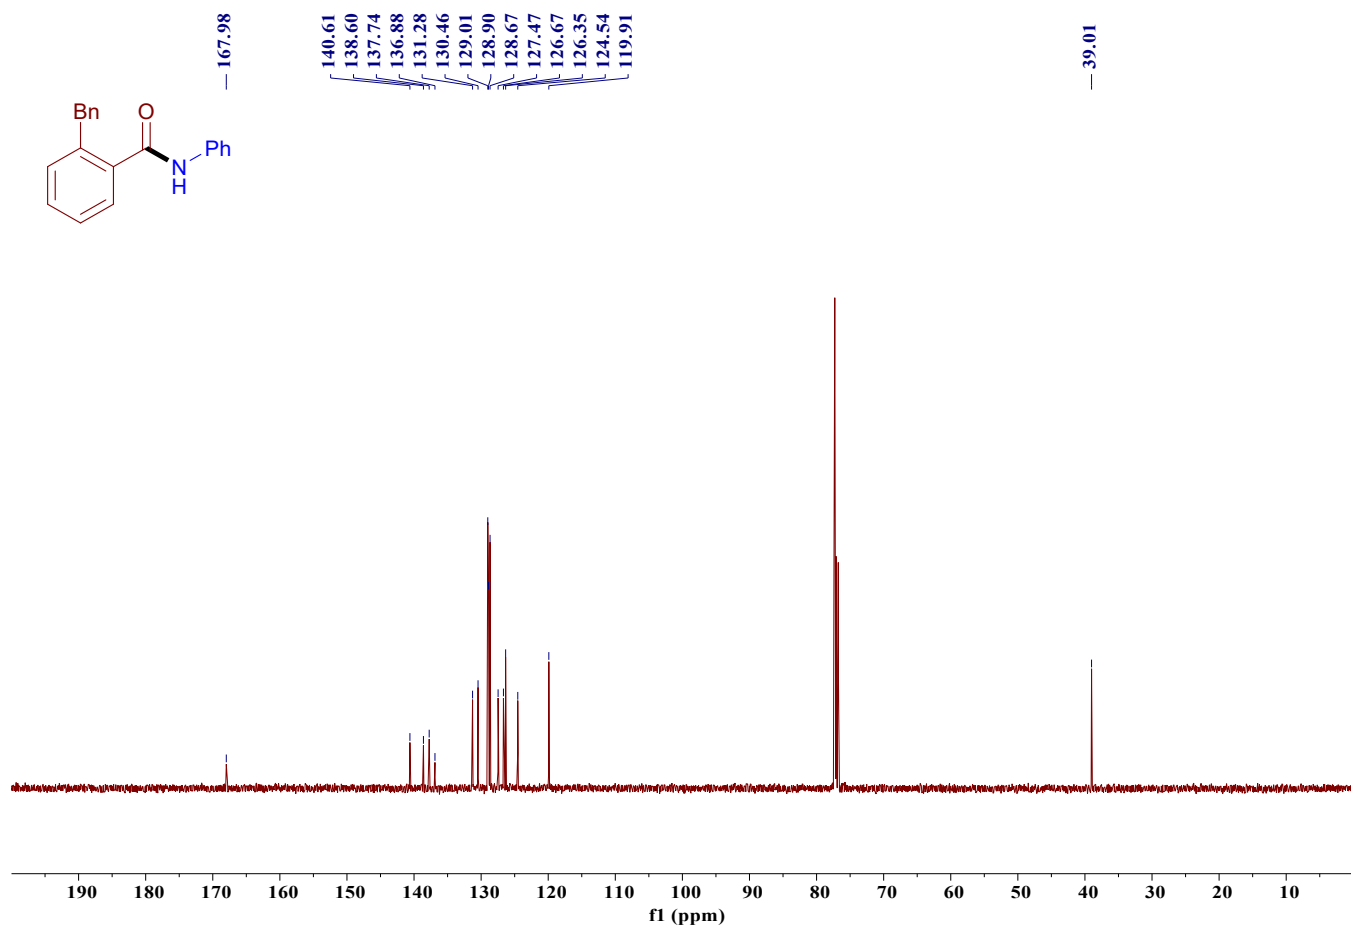

$^1\text{H}$  NMR (400 MHz,  $\text{CDCl}_3$ ),  $^{13}\text{C}$  NMR (100 MHz,  $\text{CDCl}_3$ ) of product 3ea

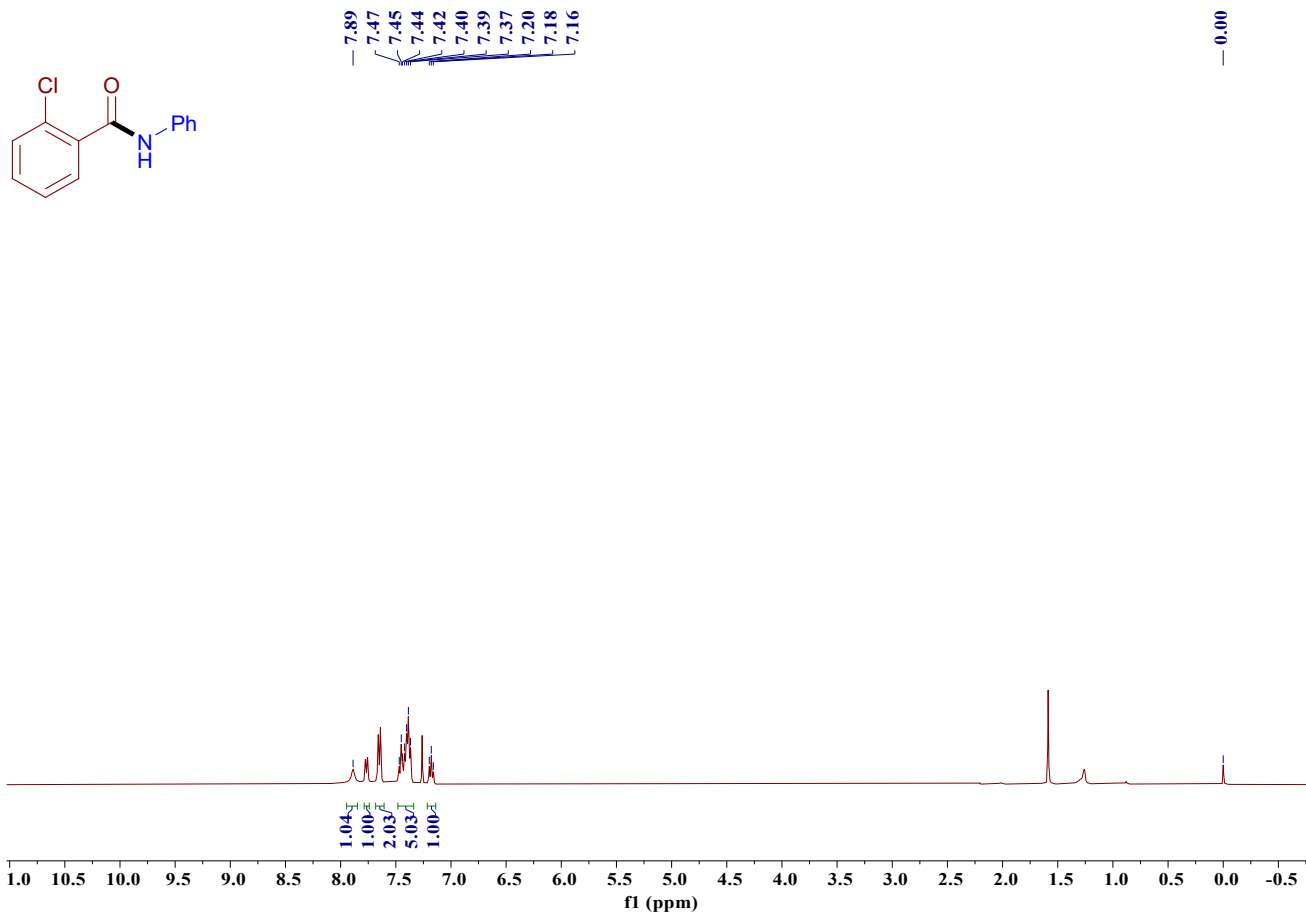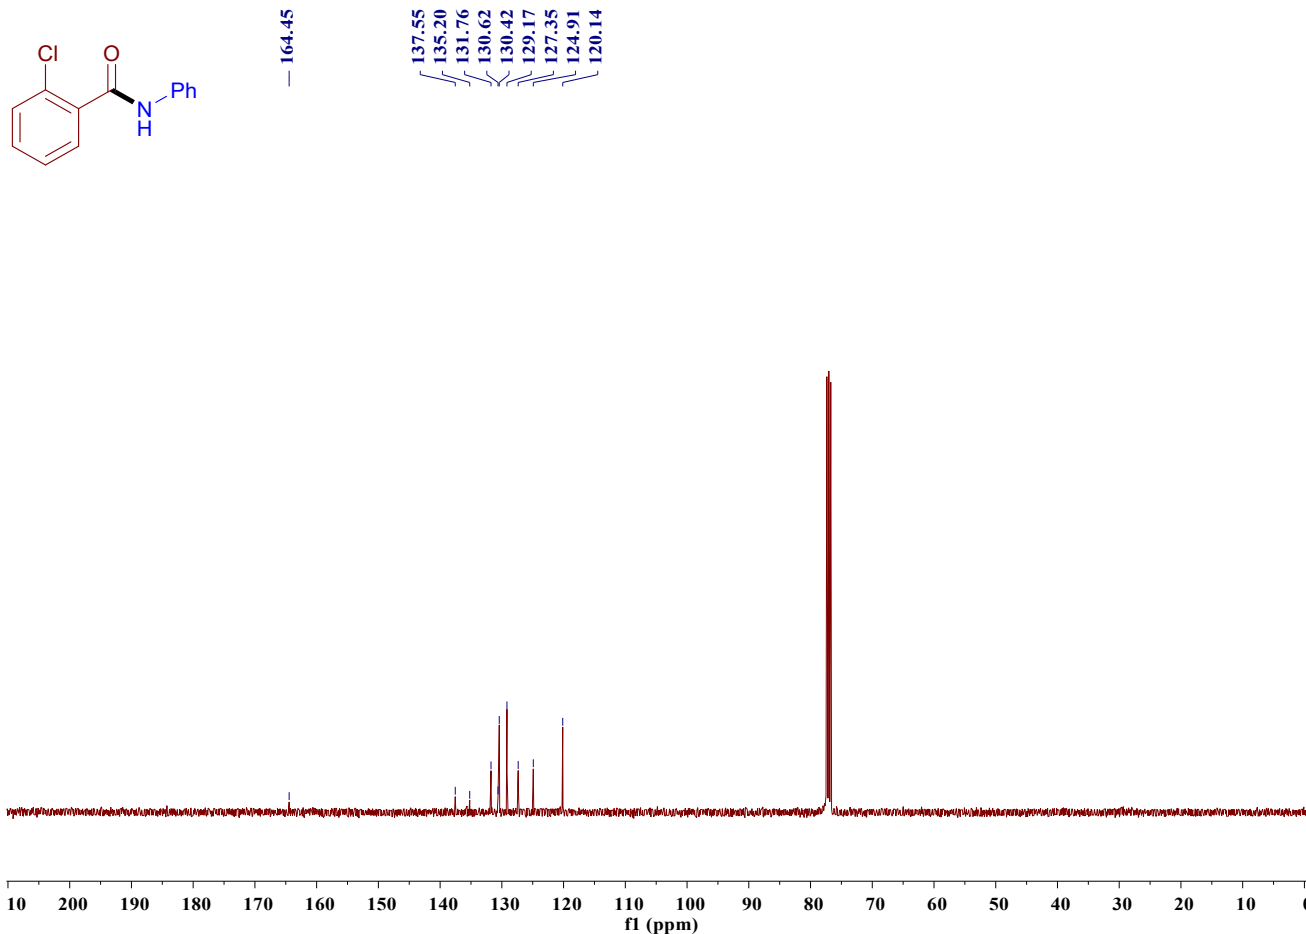

$^1\text{H}$  NMR (400 MHz,  $\text{CDCl}_3$ ),  $^{13}\text{C}$  NMR (100 MHz,  $\text{CDCl}_3$ ),  $^{19}\text{F}$  NMR (376 MHz,  $\text{CDCl}_3$ ) of product 3fa

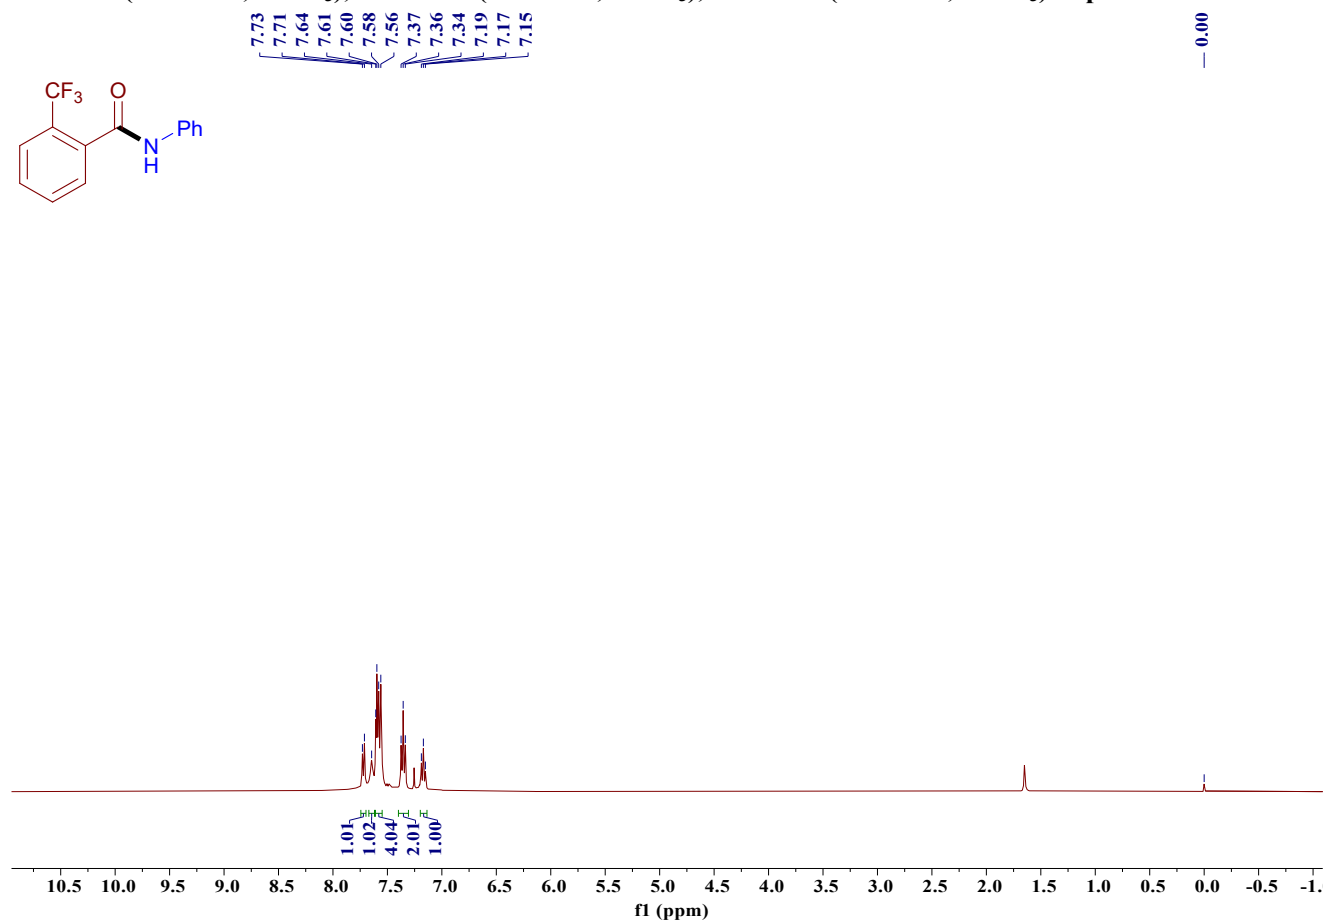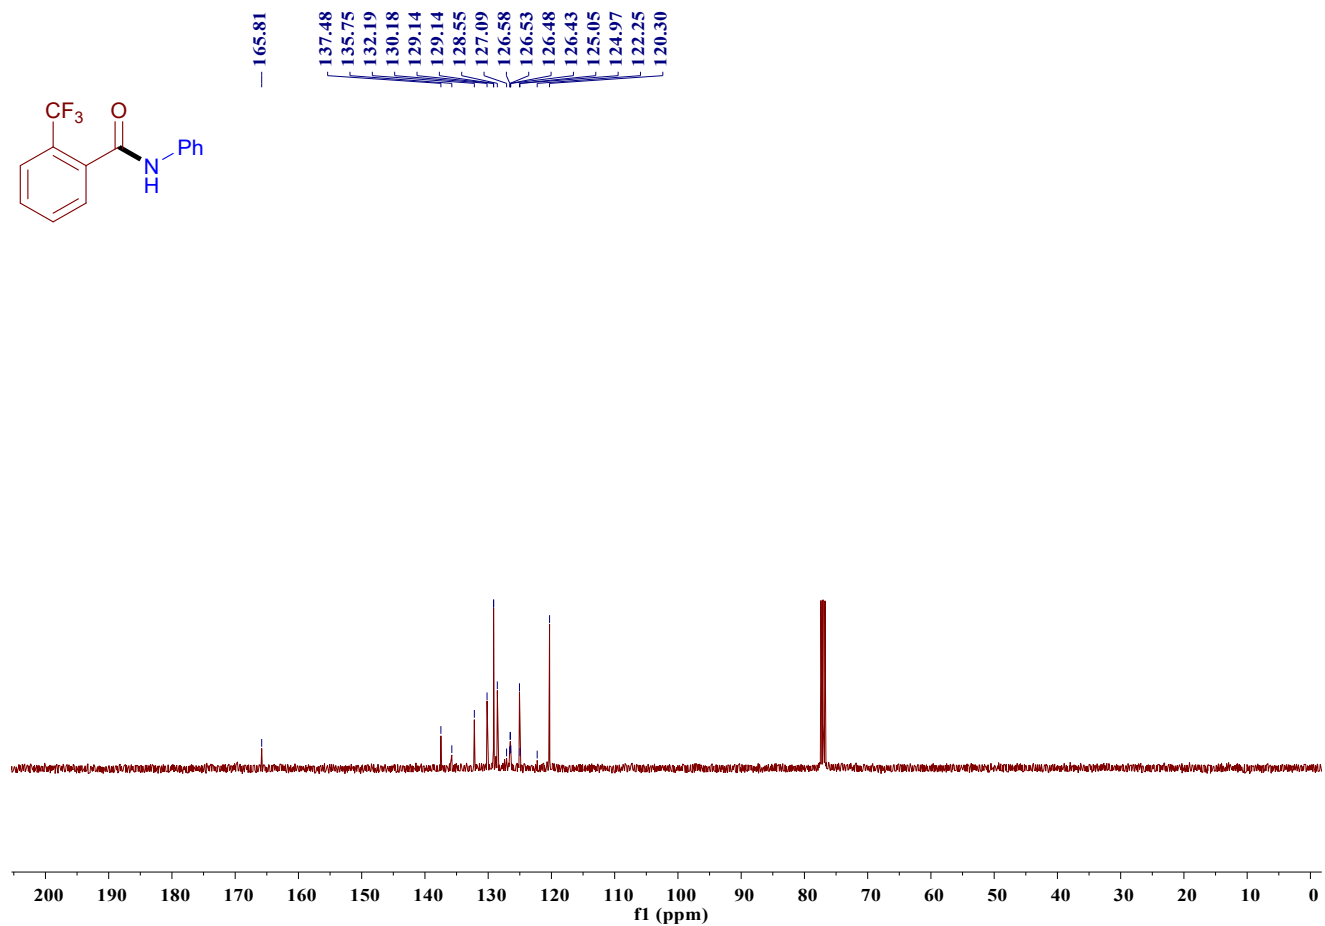



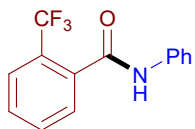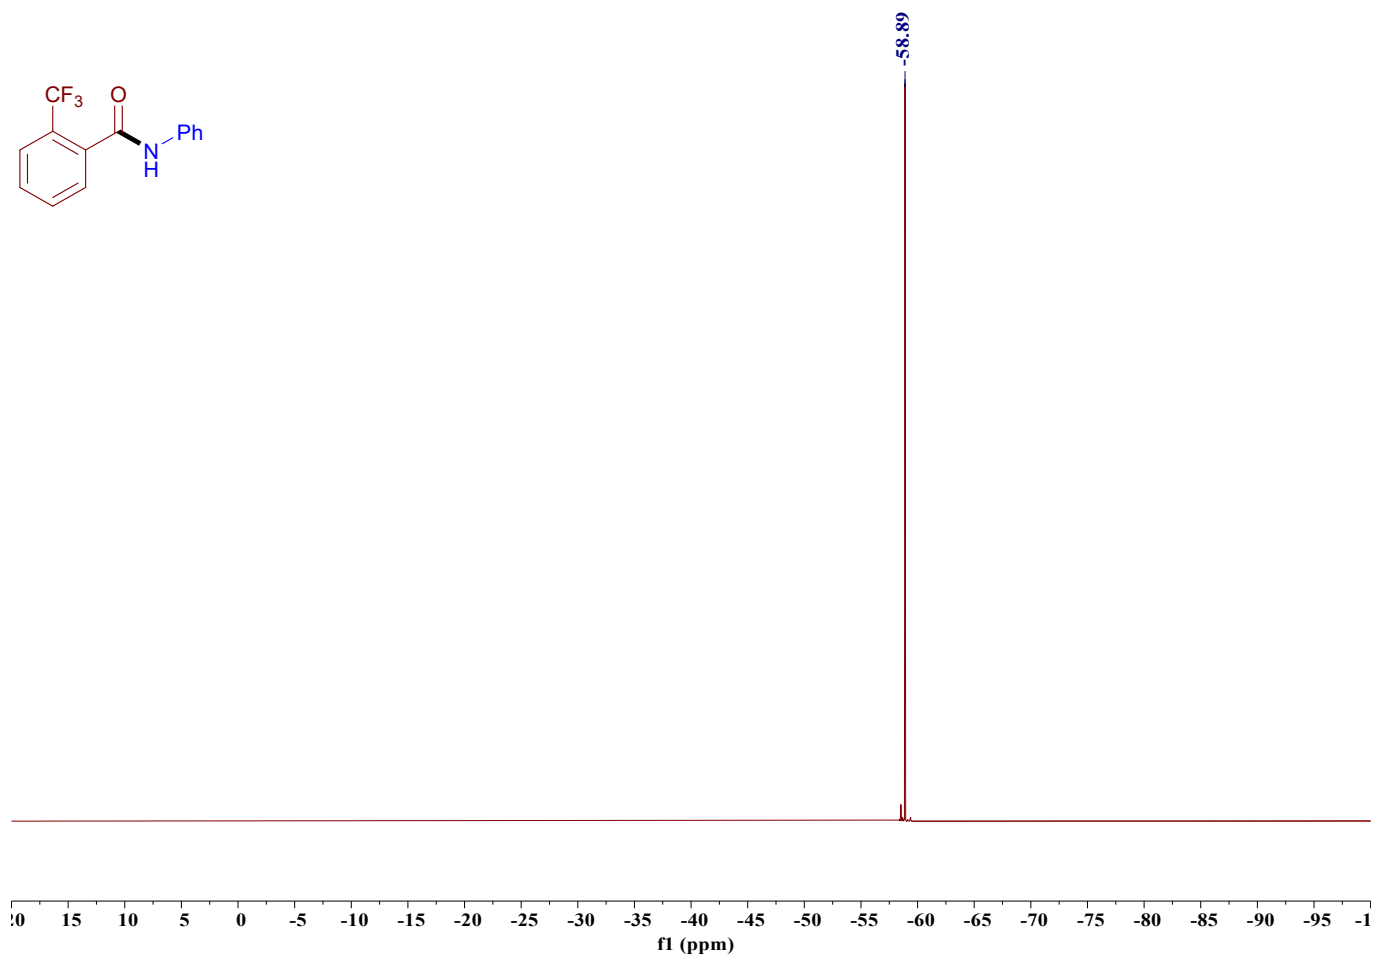

$^1\text{H}$  NMR (400 MHz,  $\text{CDCl}_3$ ),  $^{13}\text{C}$  NMR (100 MHz,  $\text{CDCl}_3$ ) of product 3ga

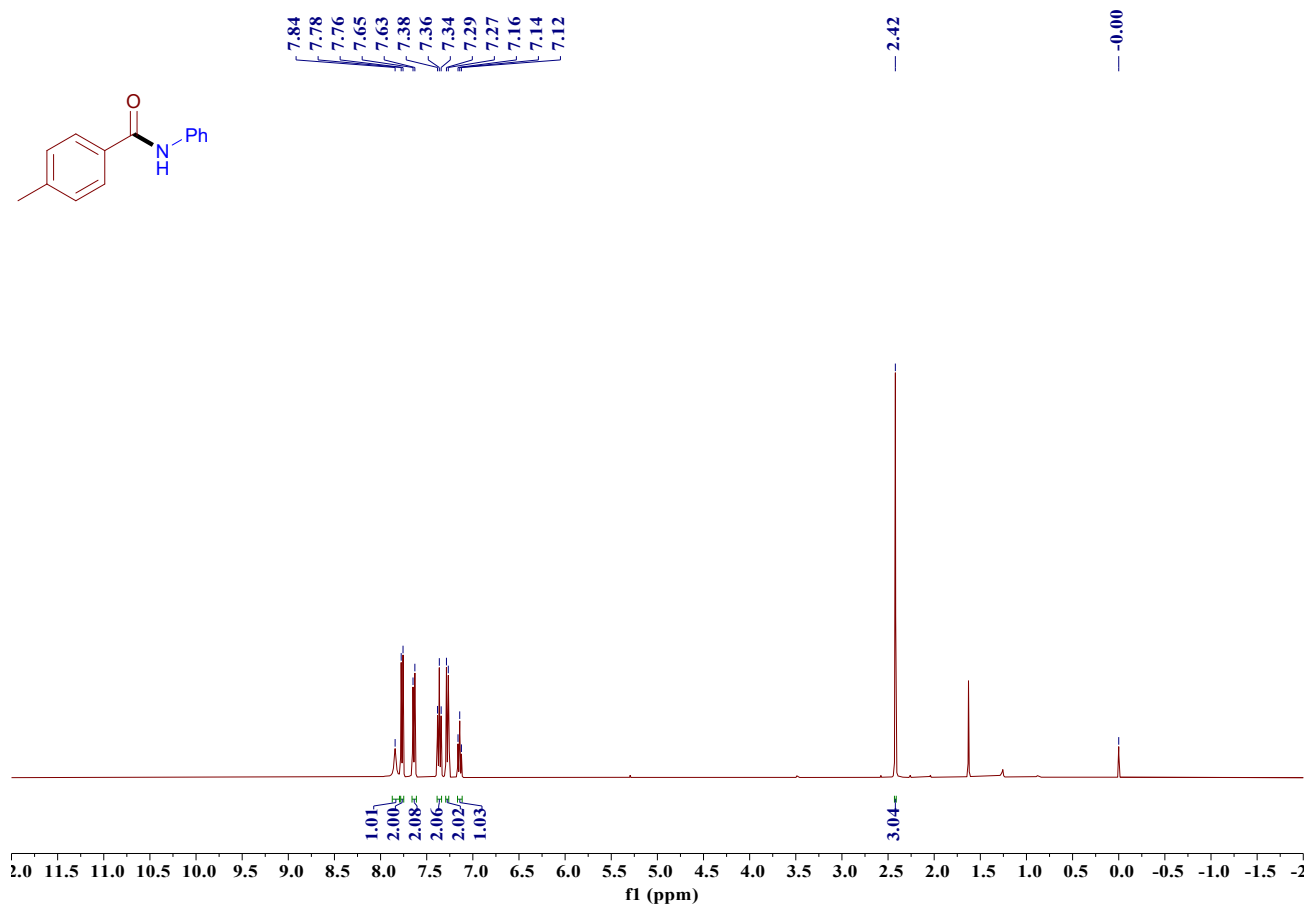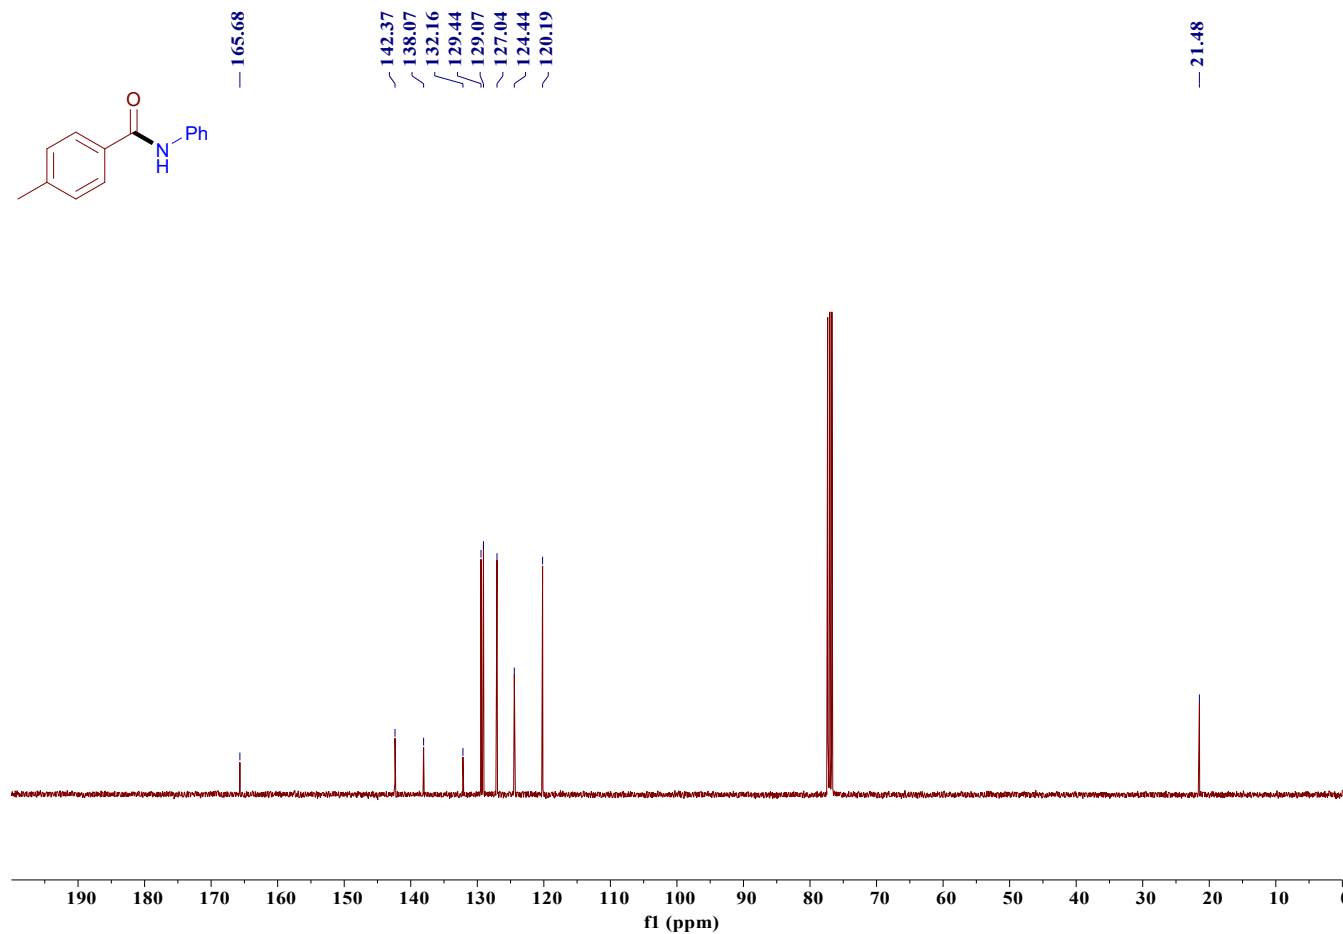

<sup>1</sup>H NMR (400 MHz, CDCl<sub>3</sub>), <sup>13</sup>C NMR (100 MHz, CDCl<sub>3</sub>) of product 3ha

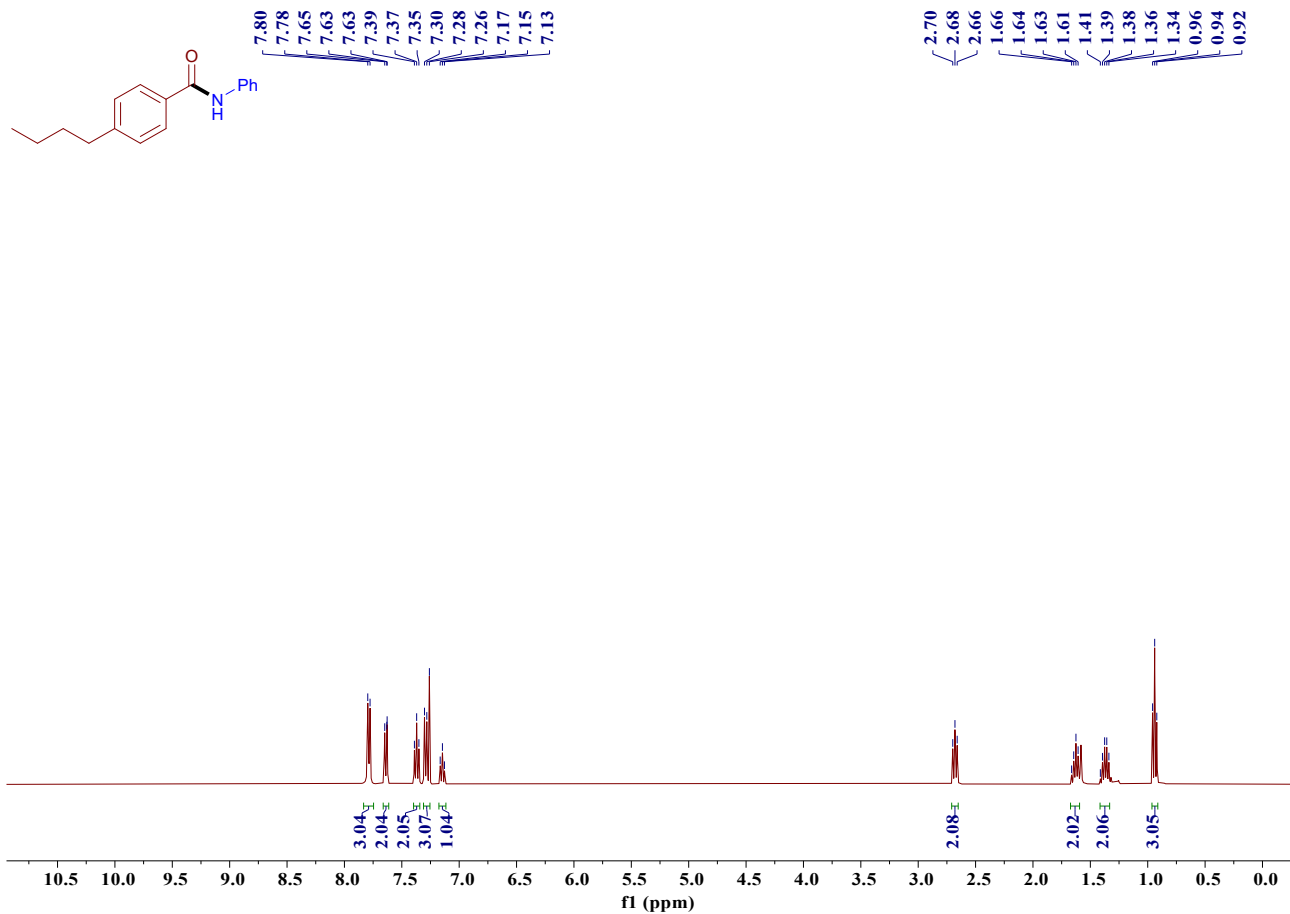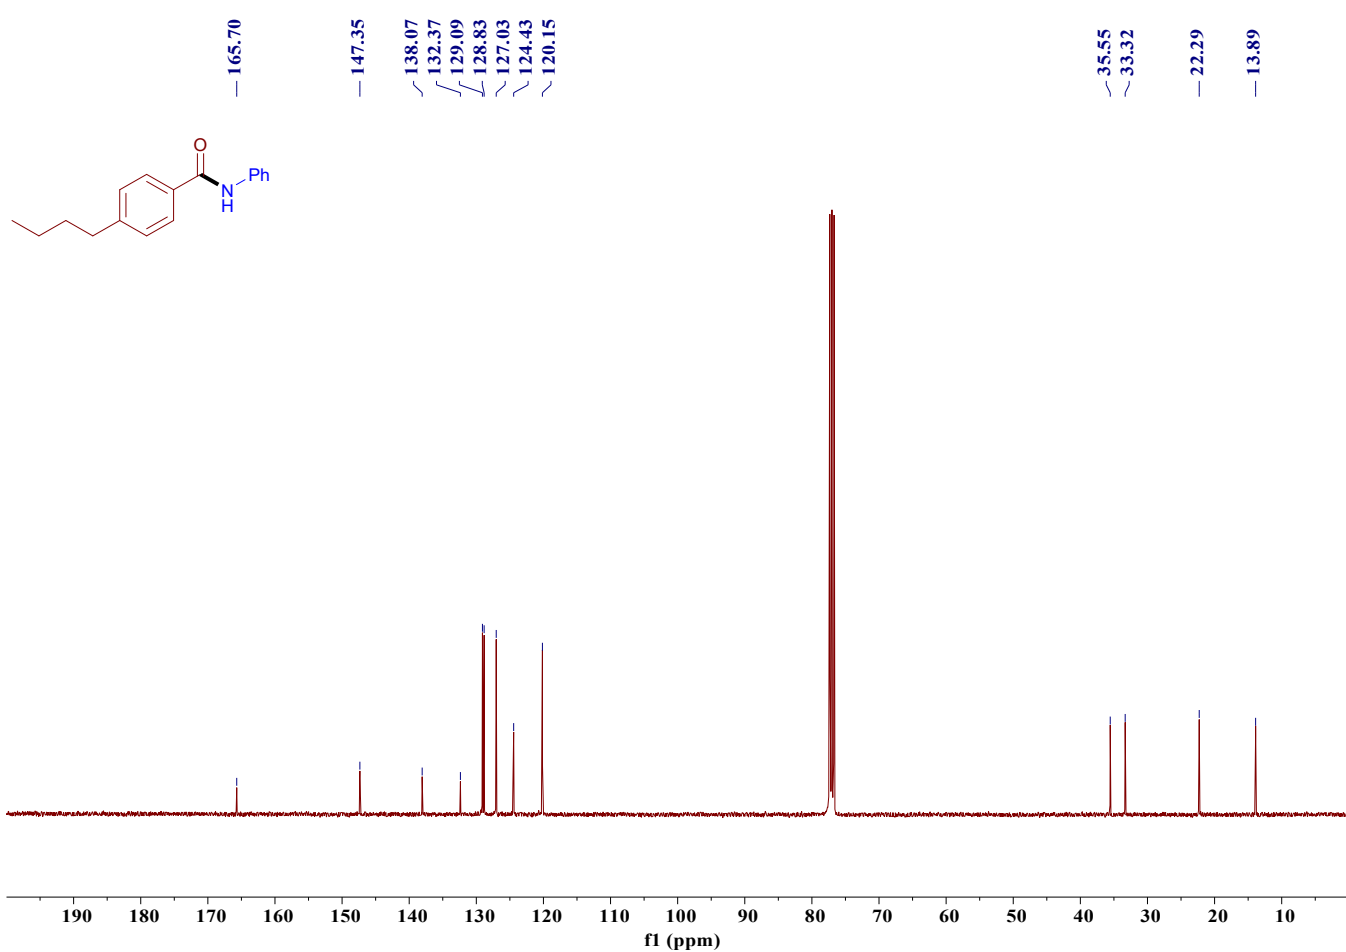

$^1\text{H}$  NMR (400 MHz,  $\text{CDCl}_3$ ),  $^{13}\text{C}$  NMR (100 MHz,  $\text{CDCl}_3$ ) of product 3ia

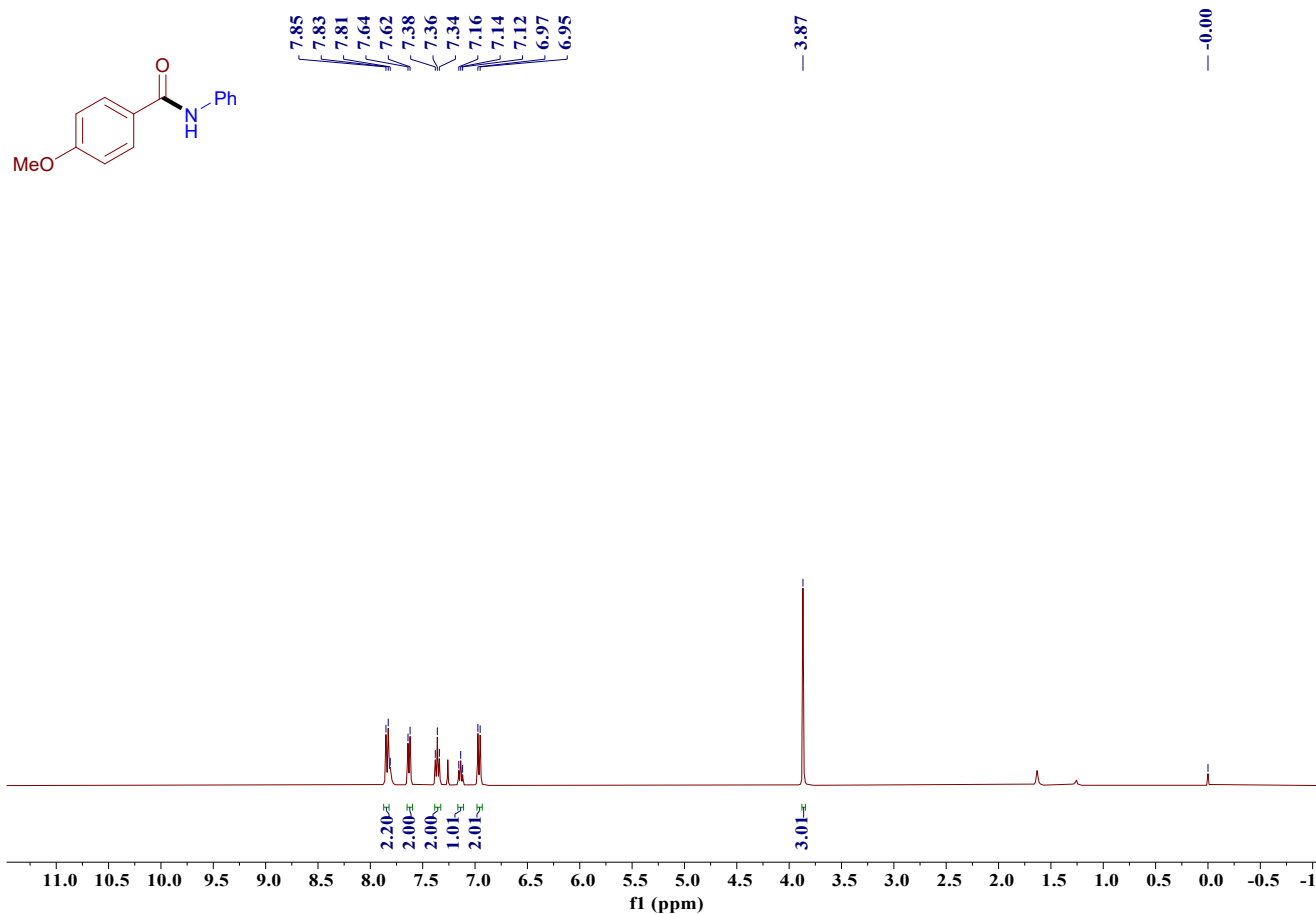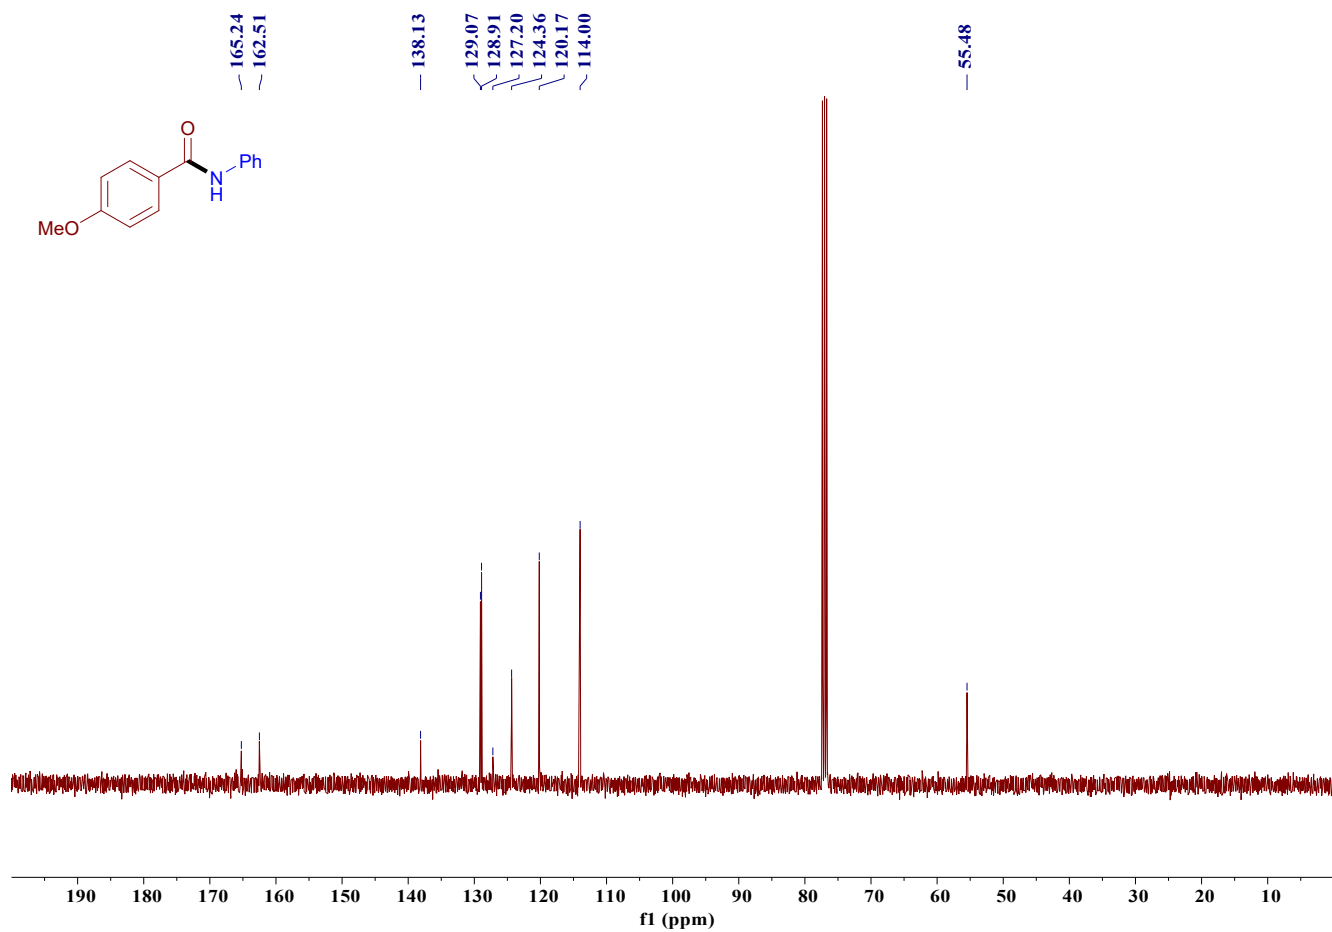

<sup>1</sup>H NMR (400 MHz, CDCl<sub>3</sub>), <sup>13</sup>C NMR (100 MHz, DMSO-*d*<sub>6</sub>) of product 3ja

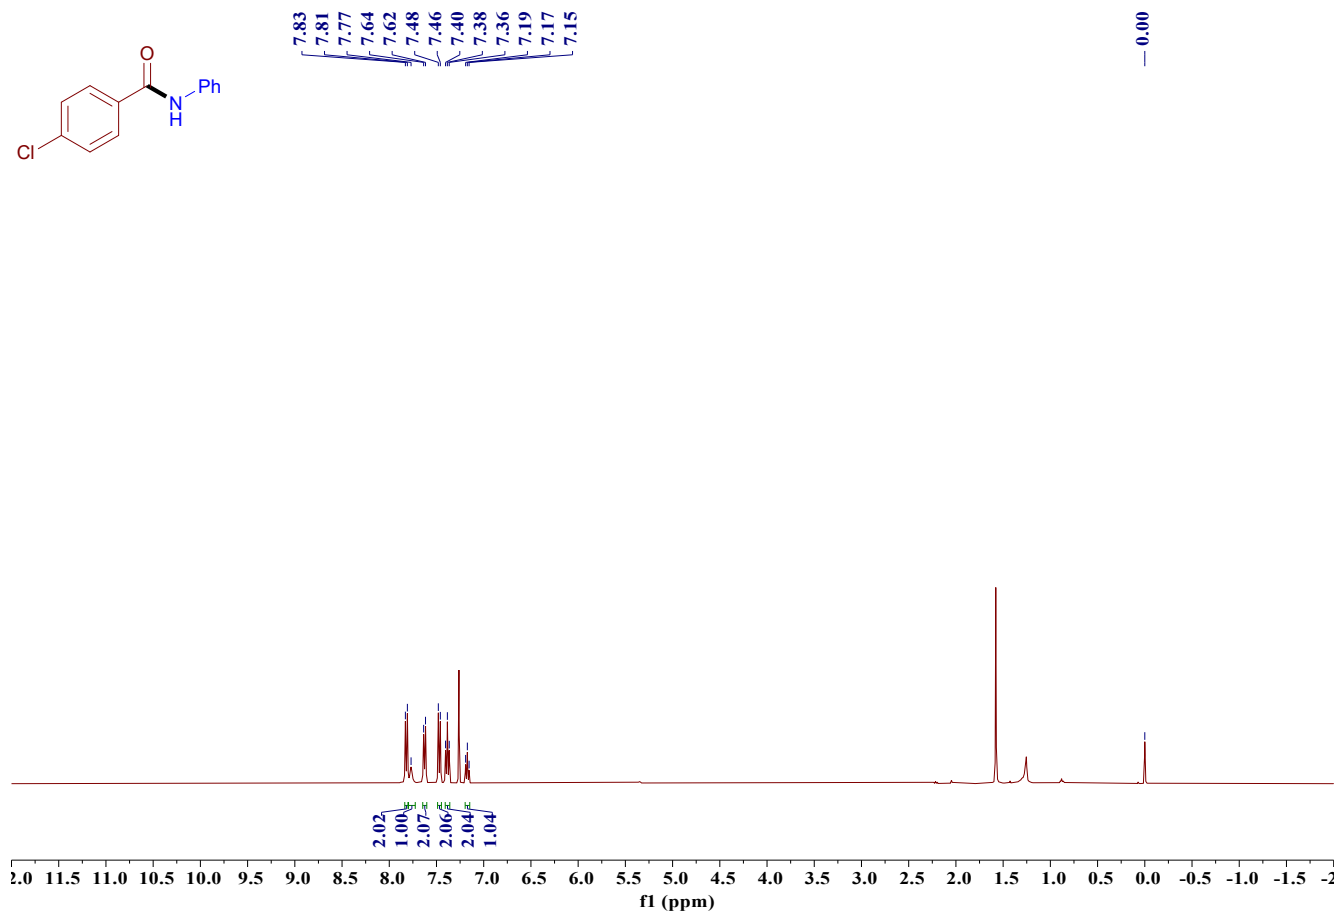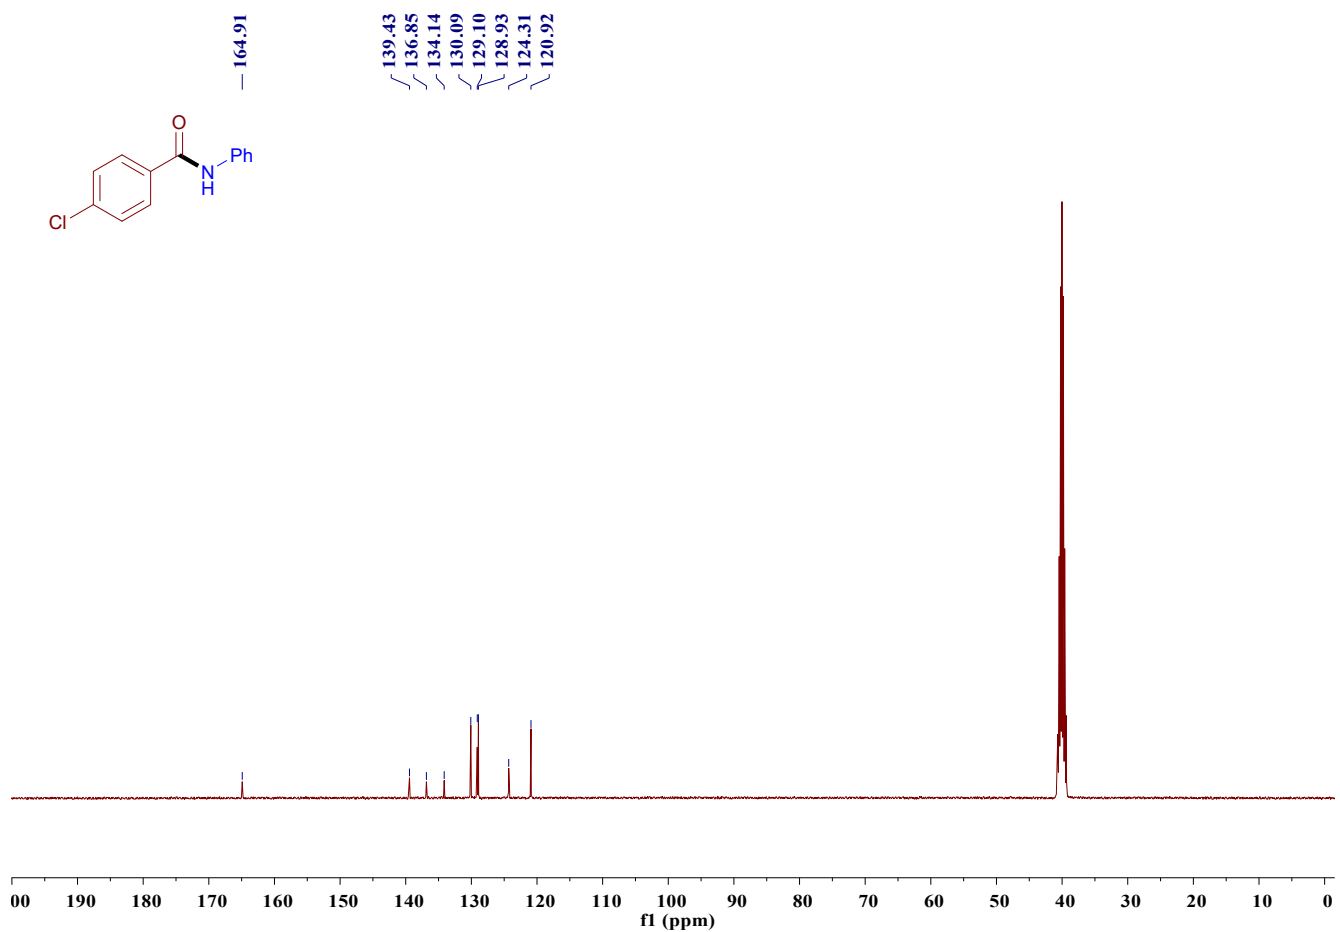

$^1\text{H}$  NMR (400 MHz,  $\text{CDCl}_3$ ),  $^{13}\text{C}$  NMR (100 MHz,  $\text{CDCl}_3$ ) of product 3ka

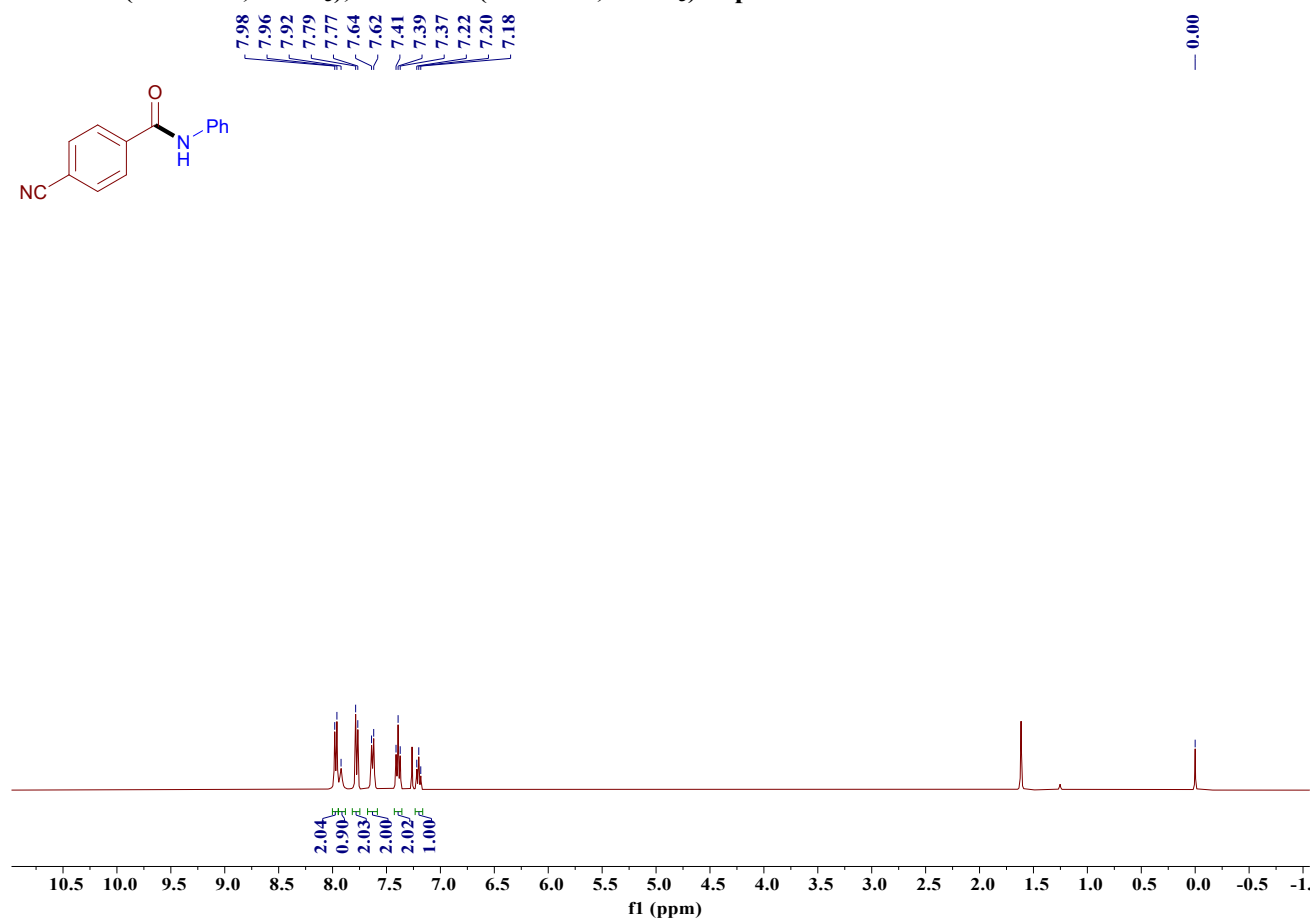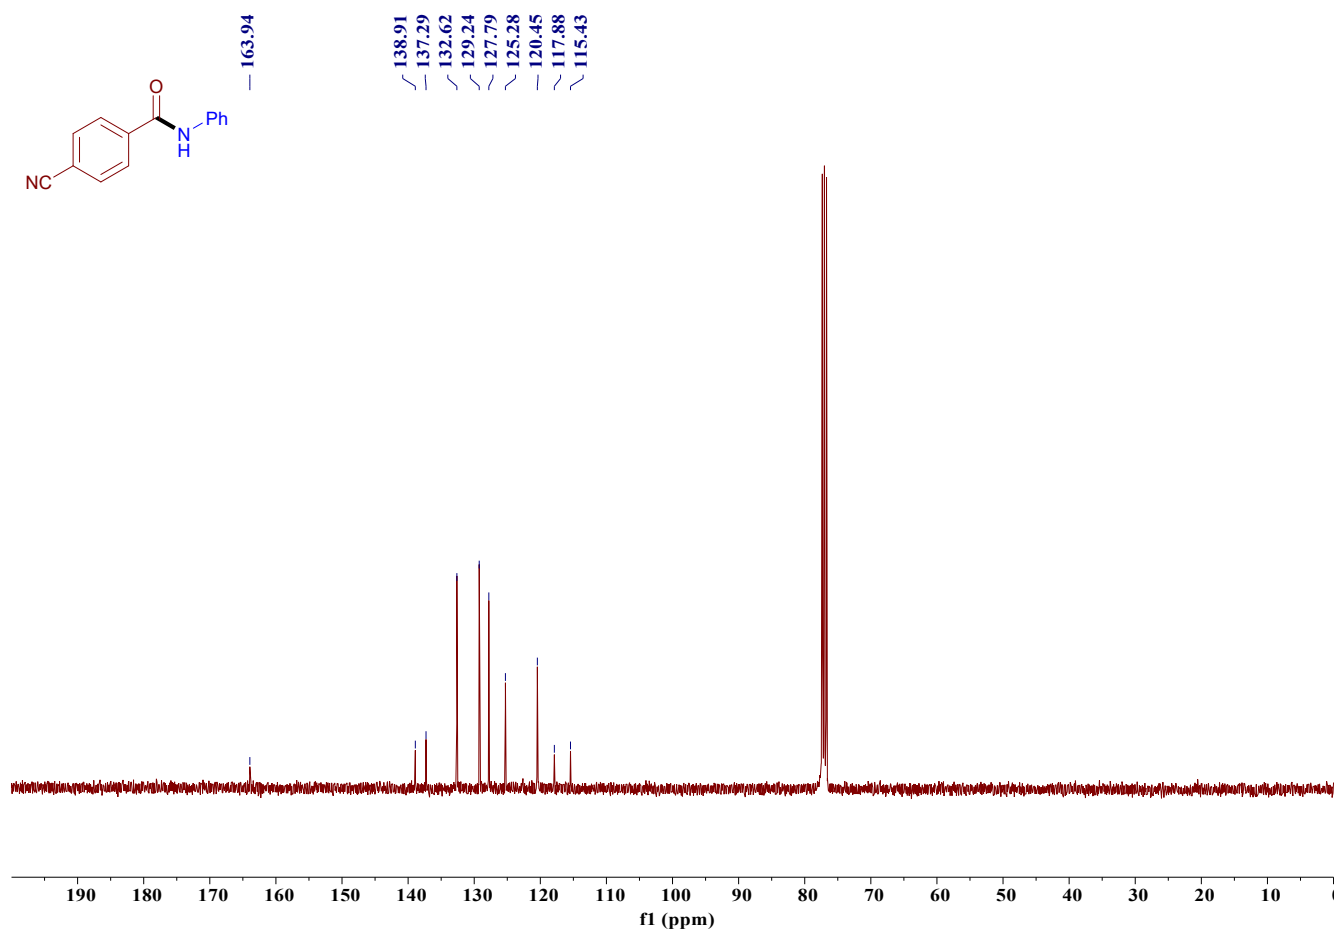

$^1\text{H}$  NMR (400 MHz,  $\text{CDCl}_3$ ),  $^{13}\text{C}$  NMR (100 MHz,  $\text{DMSO}-d_6$ ) of product 3la

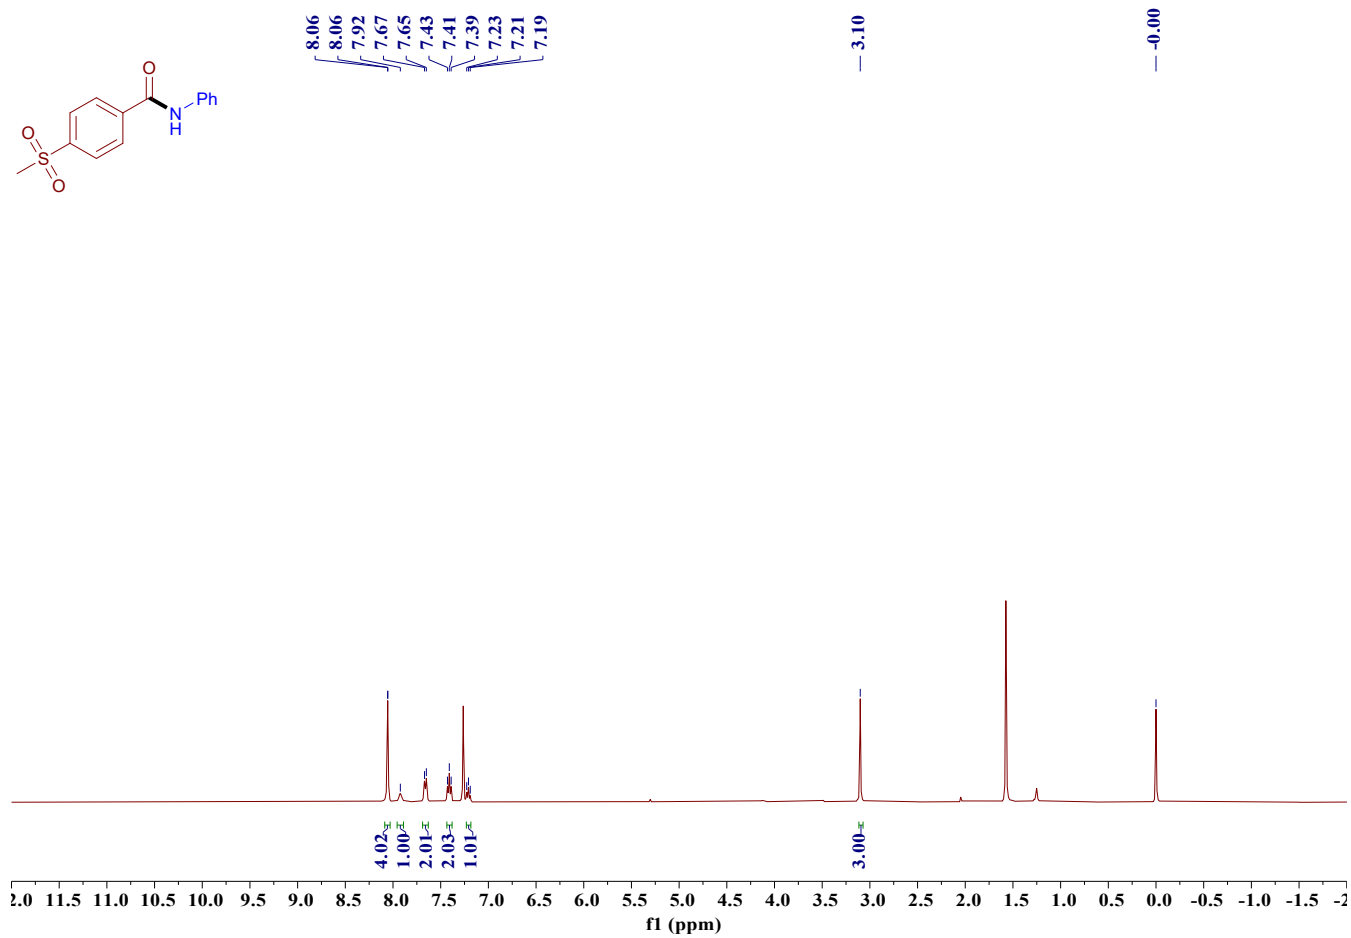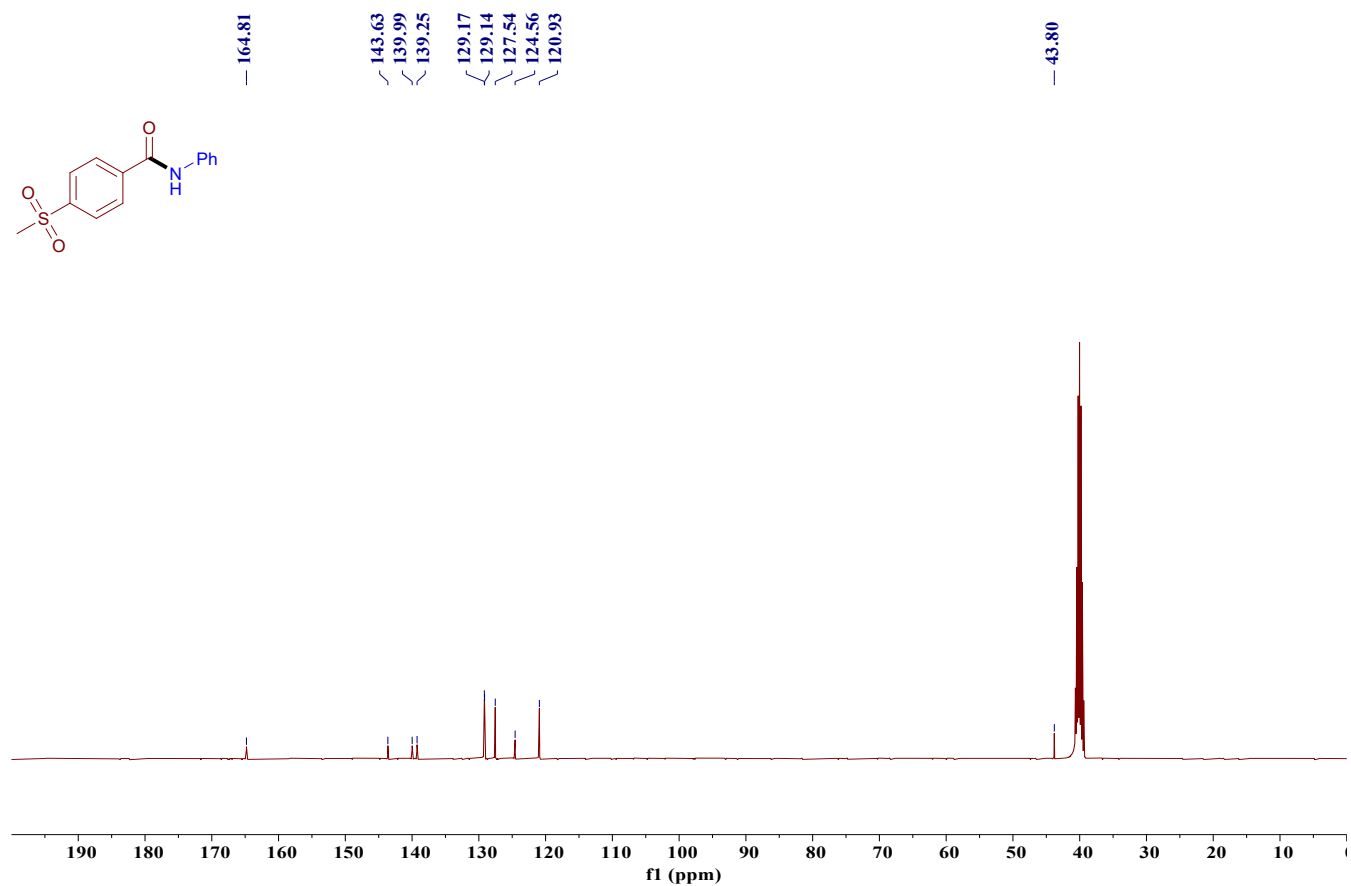

$^1\text{H}$  NMR (400 MHz,  $\text{CDCl}_3$ ),  $^{13}\text{C}$  NMR (100 MHz,  $\text{CDCl}_3$ ) of product 3ma

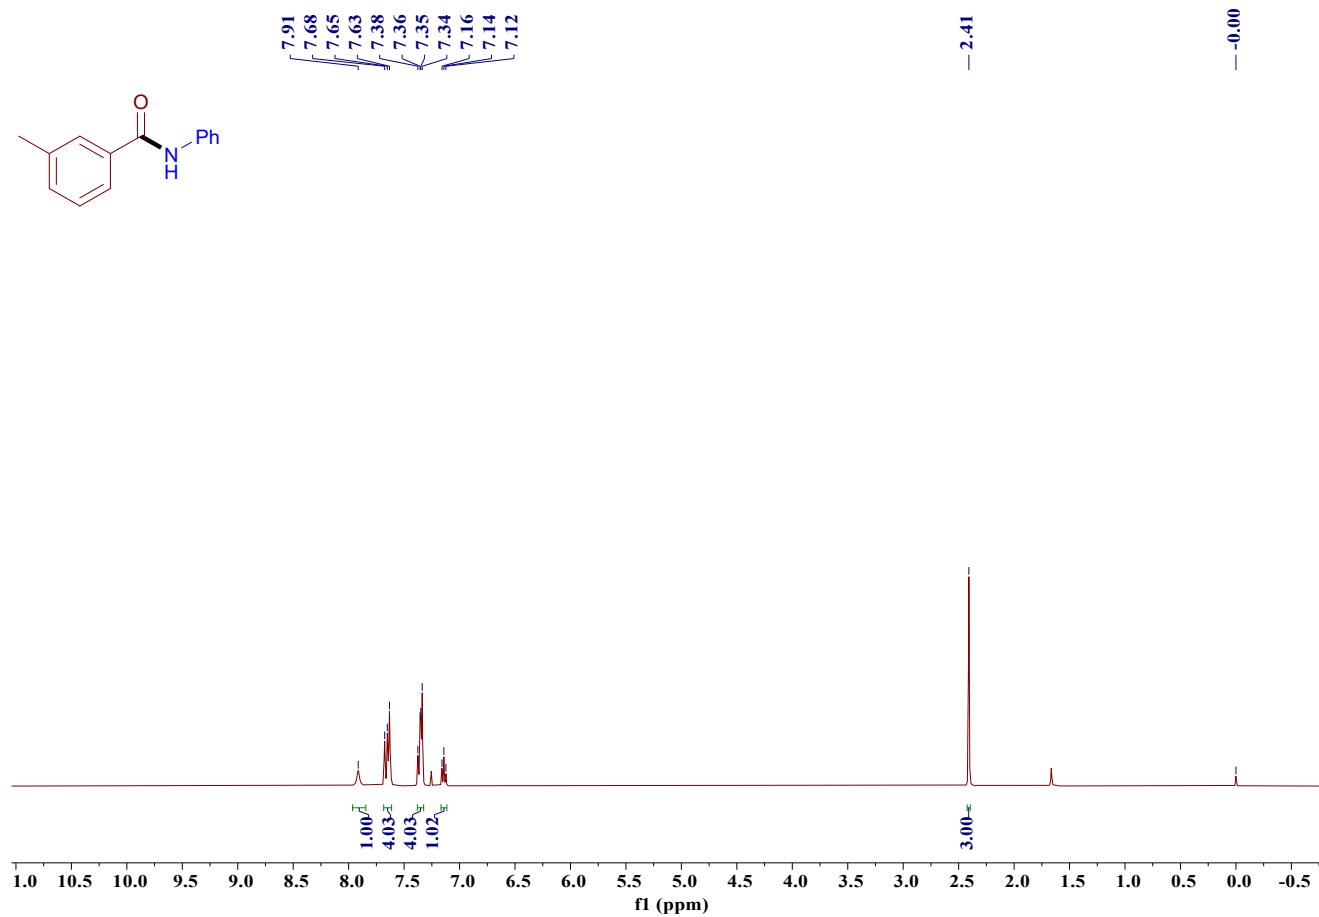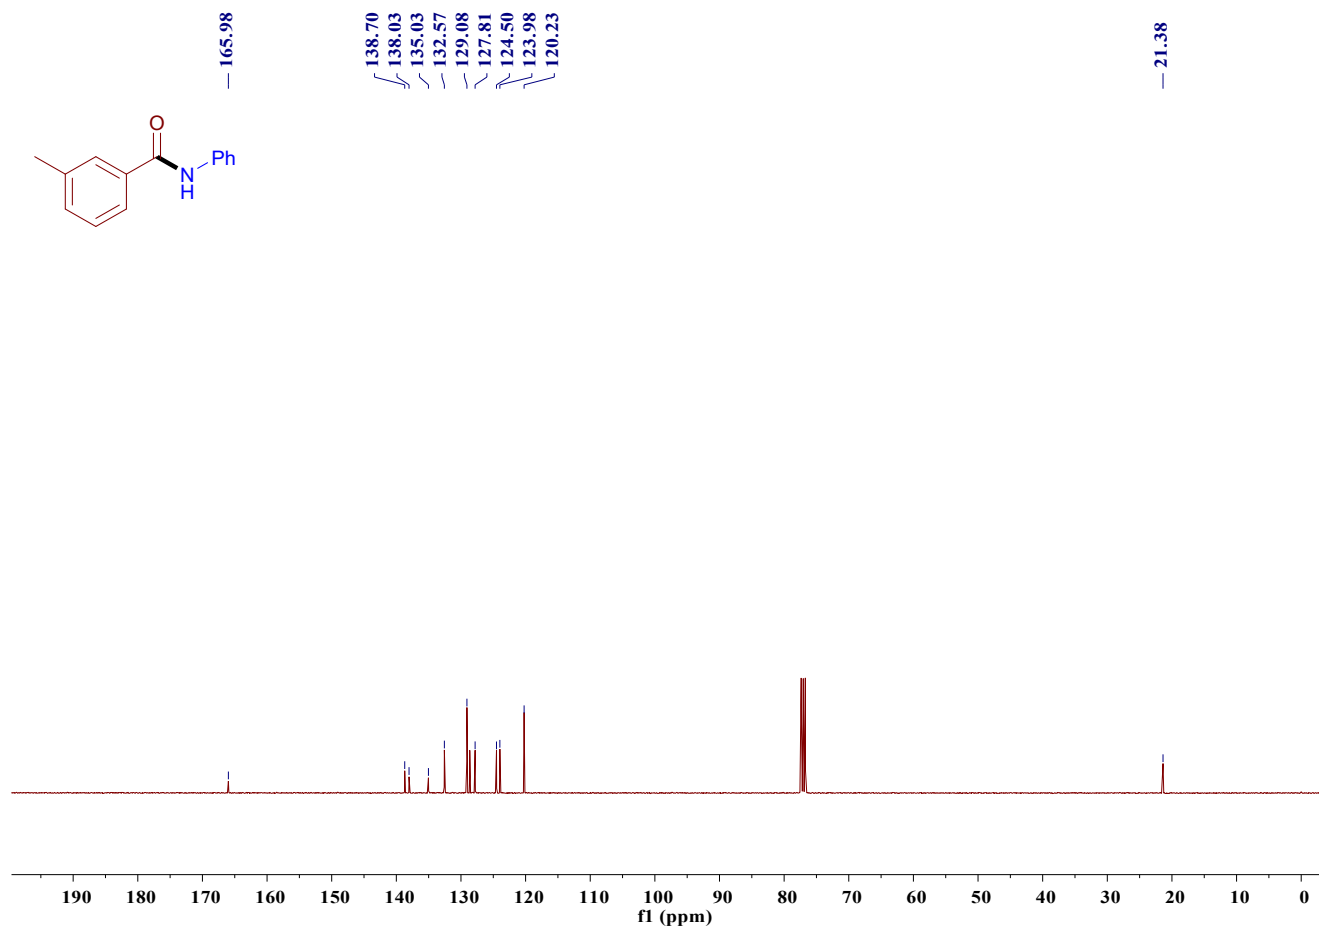



$^1\text{H}$  NMR (400 MHz,  $\text{CDCl}_3$ ),  $^{13}\text{C}$  NMR (100 MHz,  $\text{CDCl}_3$ ) of product 3na

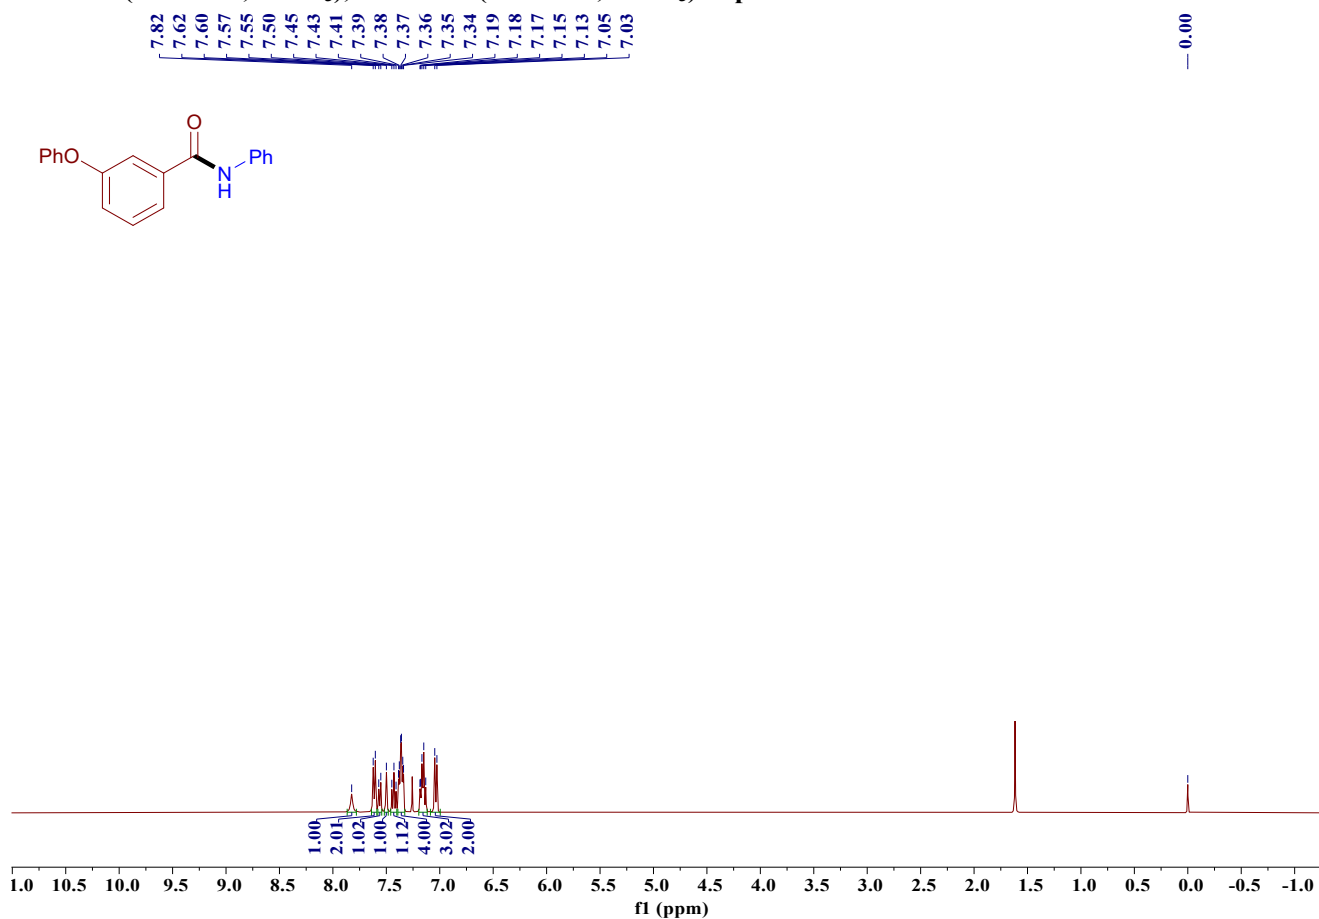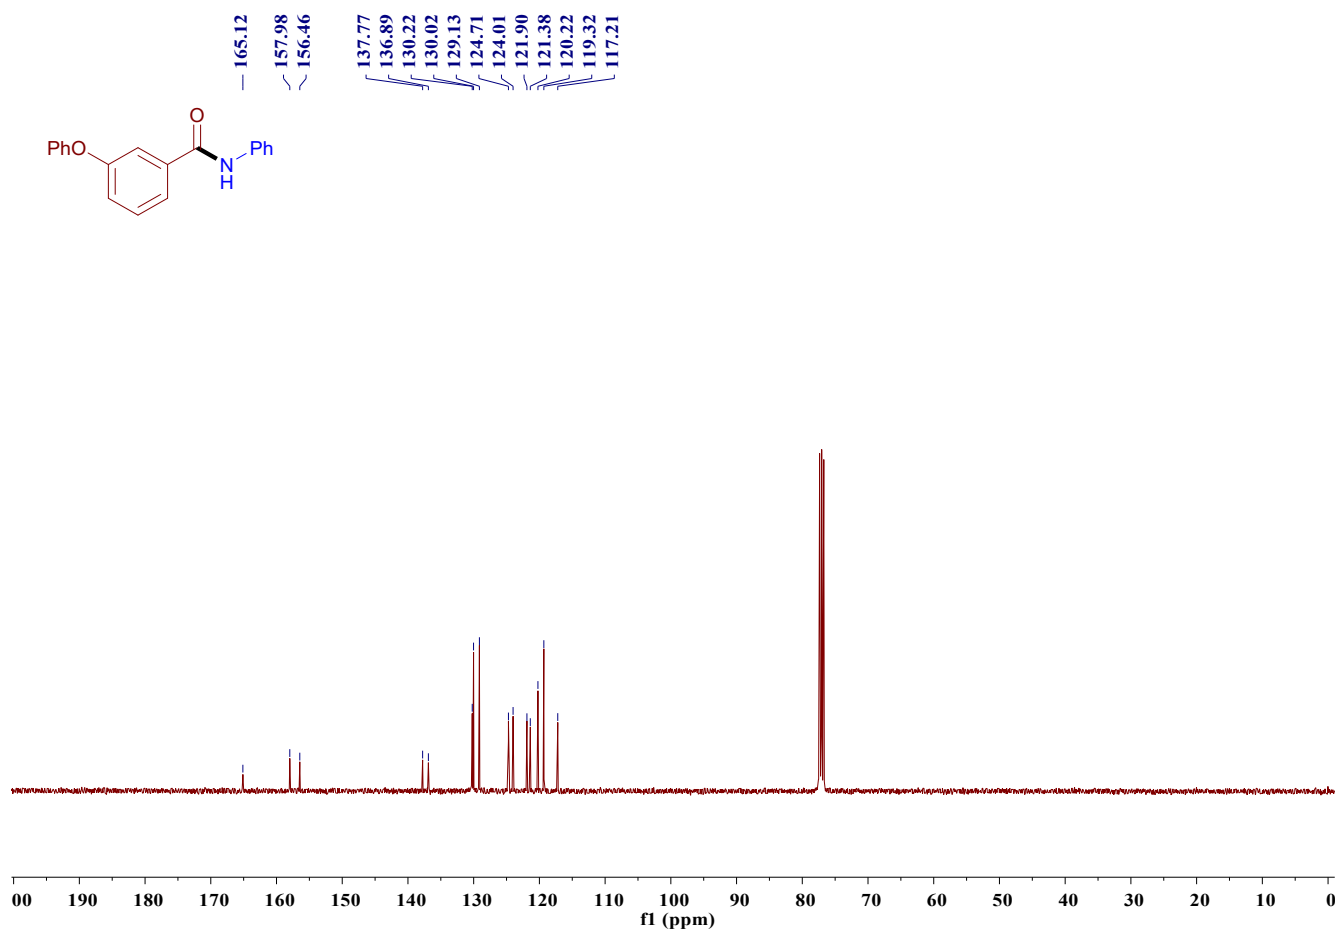

$^1\text{H}$  NMR (400 MHz,  $\text{CDCl}_3$ ),  $^{13}\text{C}$  NMR (100 MHz,  $\text{CDCl}_3$ ) of product 30a

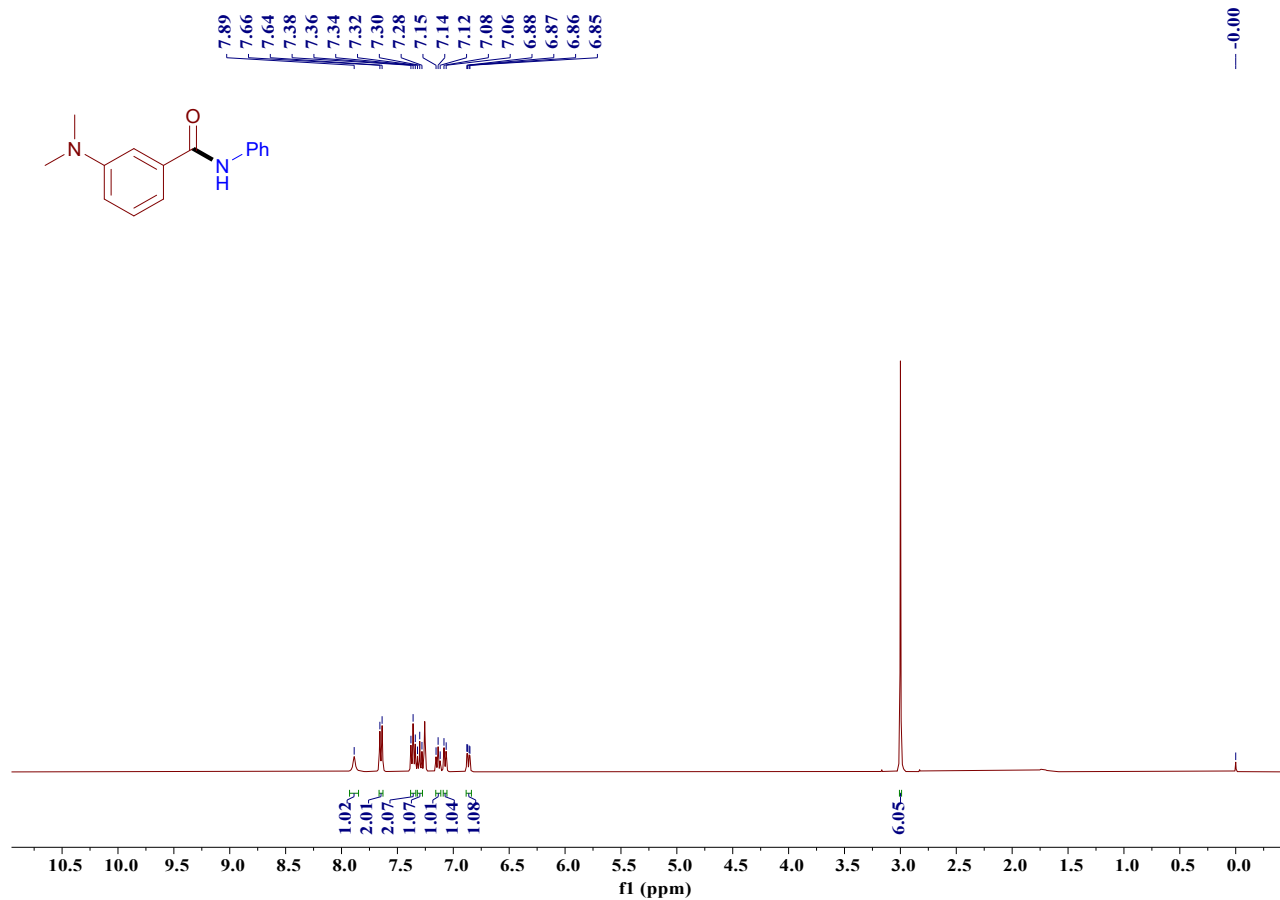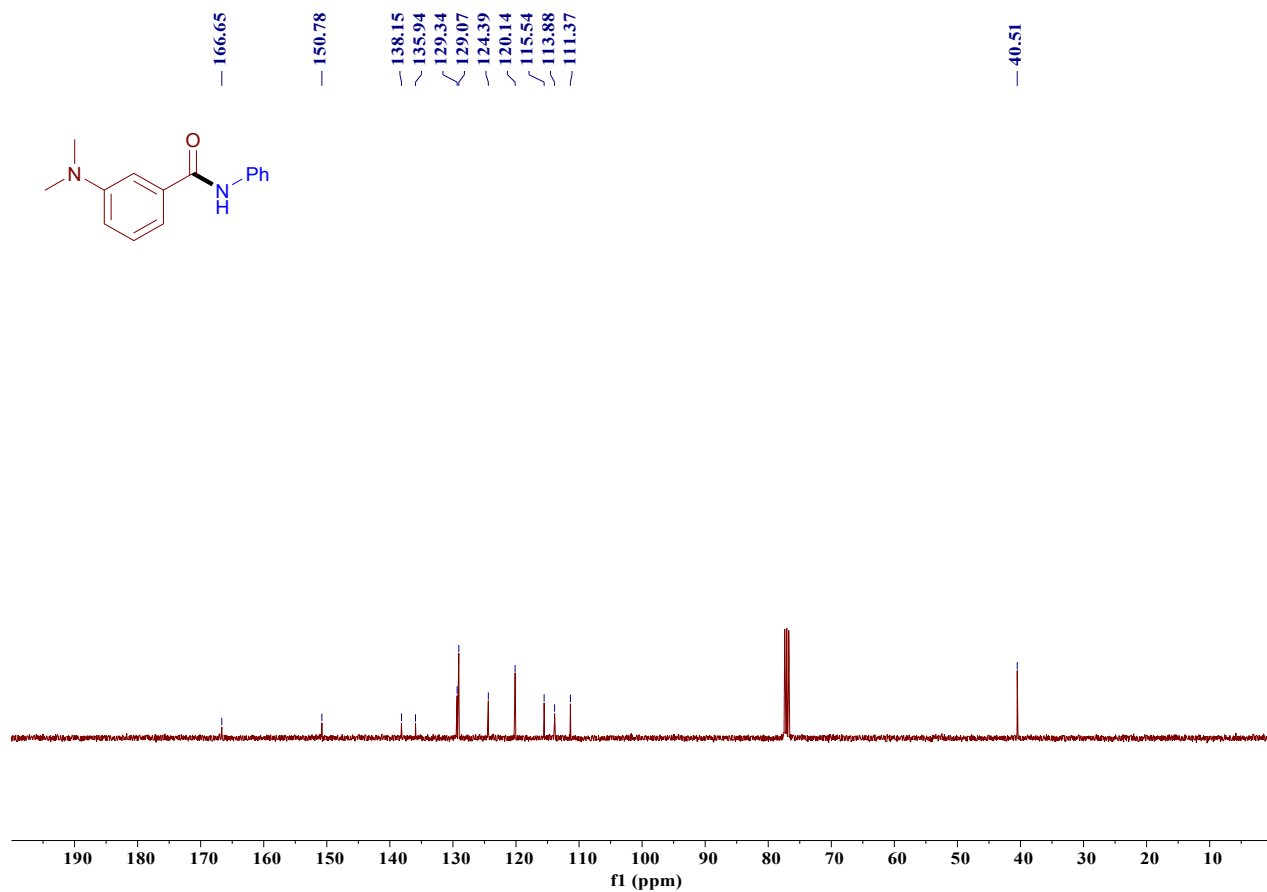

<sup>1</sup>H NMR (400 MHz, CDCl<sub>3</sub>), <sup>13</sup>C NMR (100 MHz, CDCl<sub>3</sub>) of product 3pa

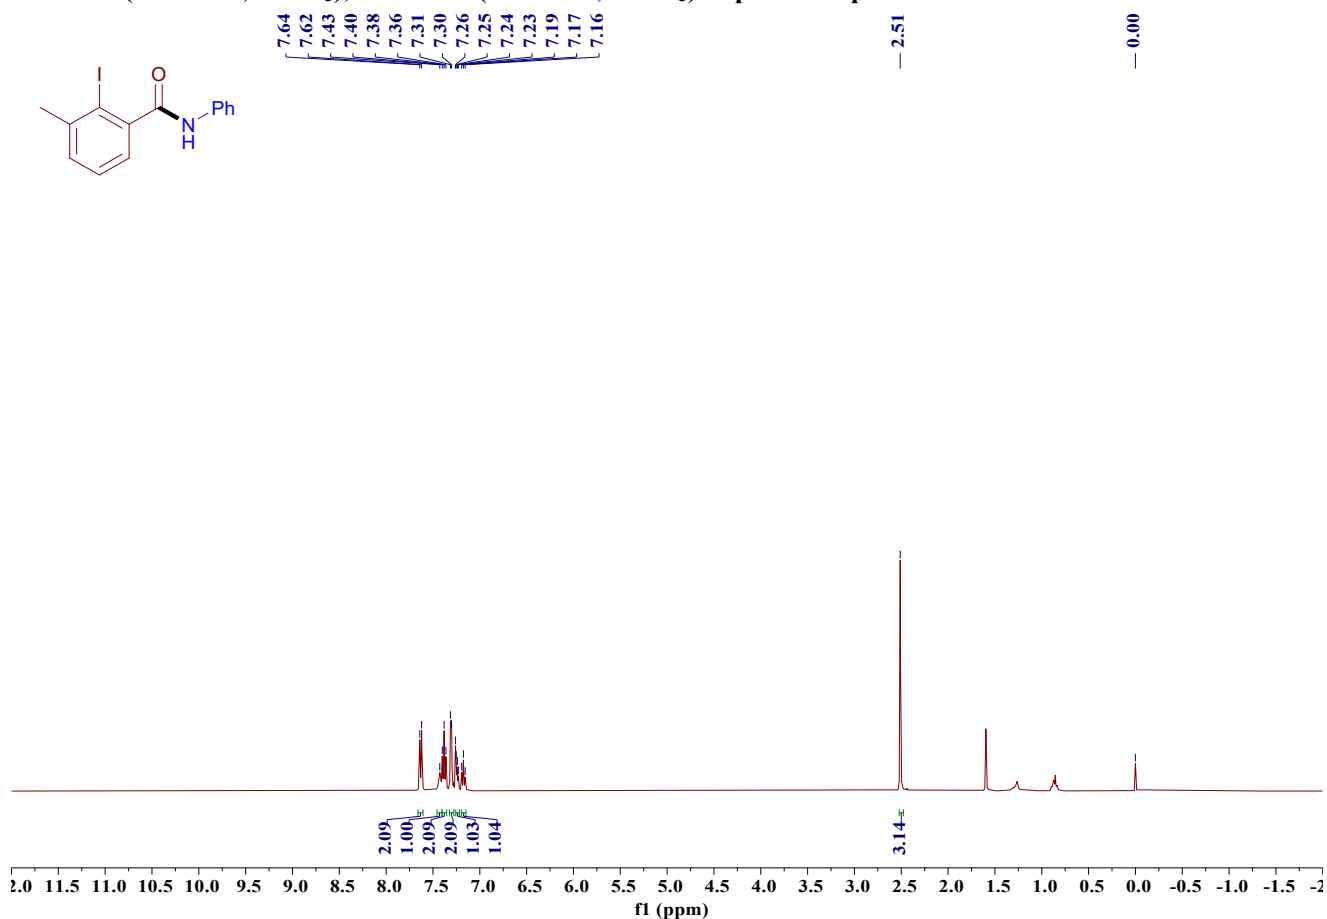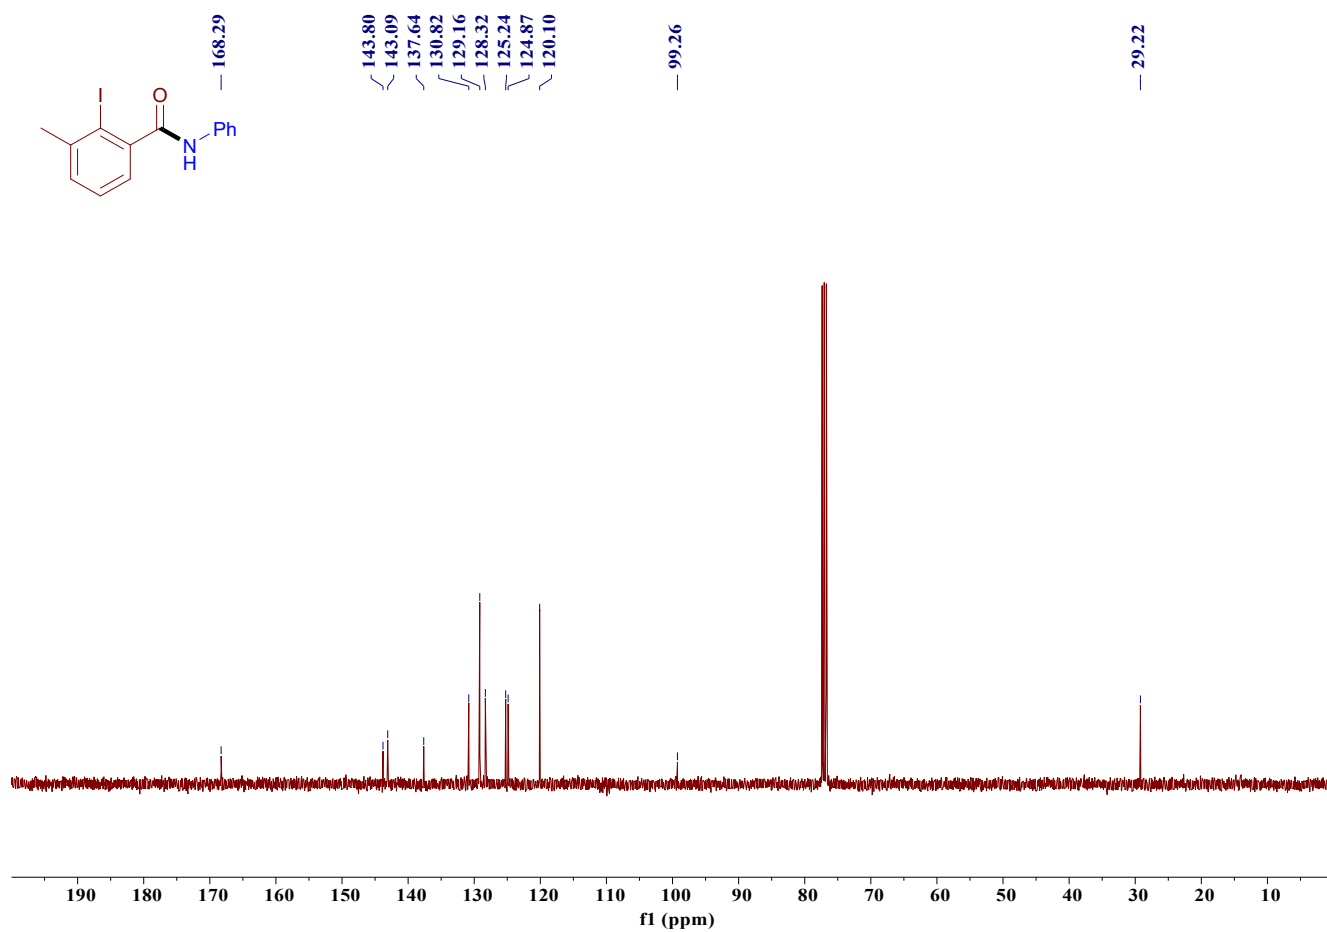

$^1\text{H}$  NMR (400 MHz,  $\text{CDCl}_3$ ),  $^{13}\text{C}$  NMR (100 MHz,  $\text{CDCl}_3$ ) of product 3qa

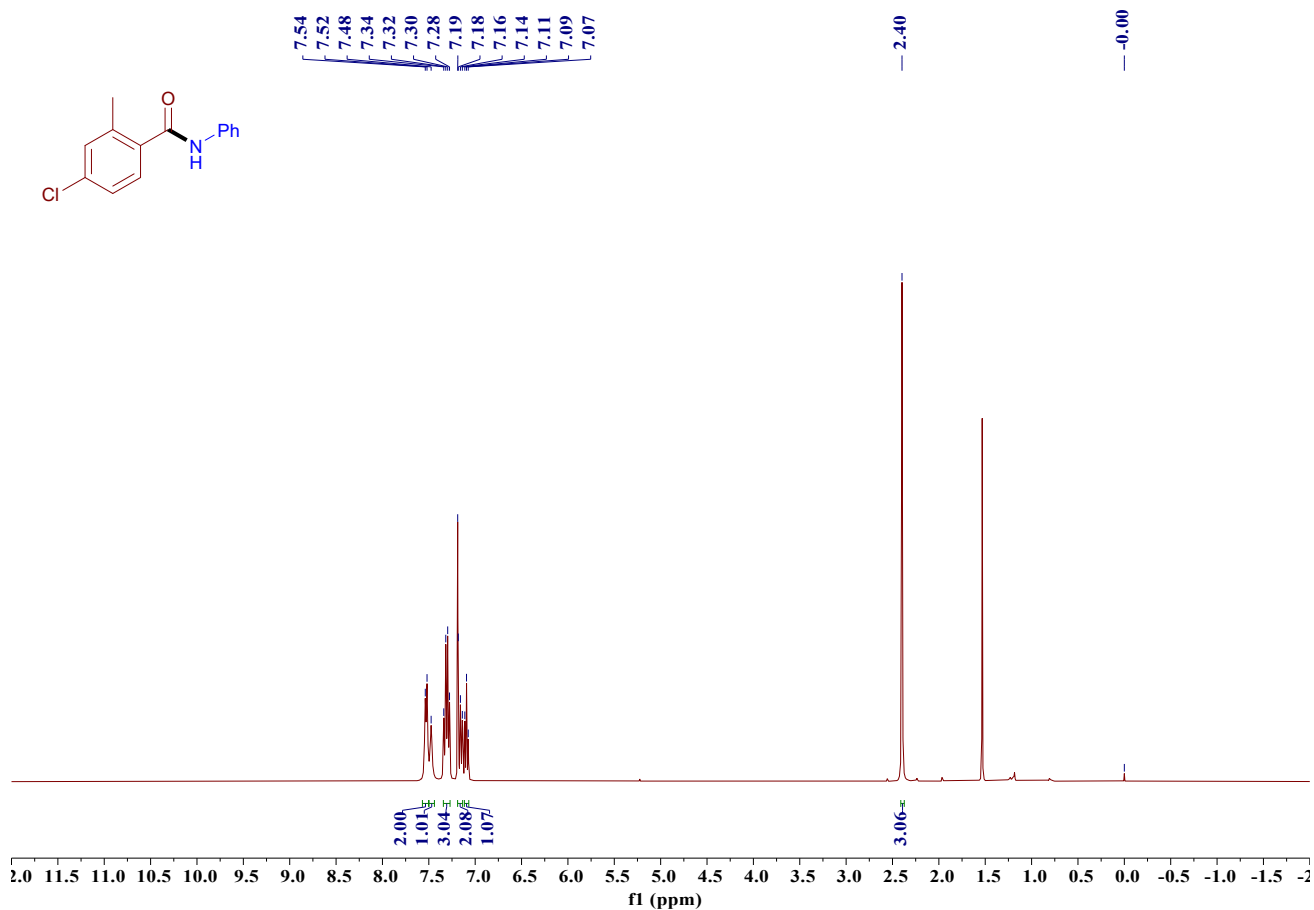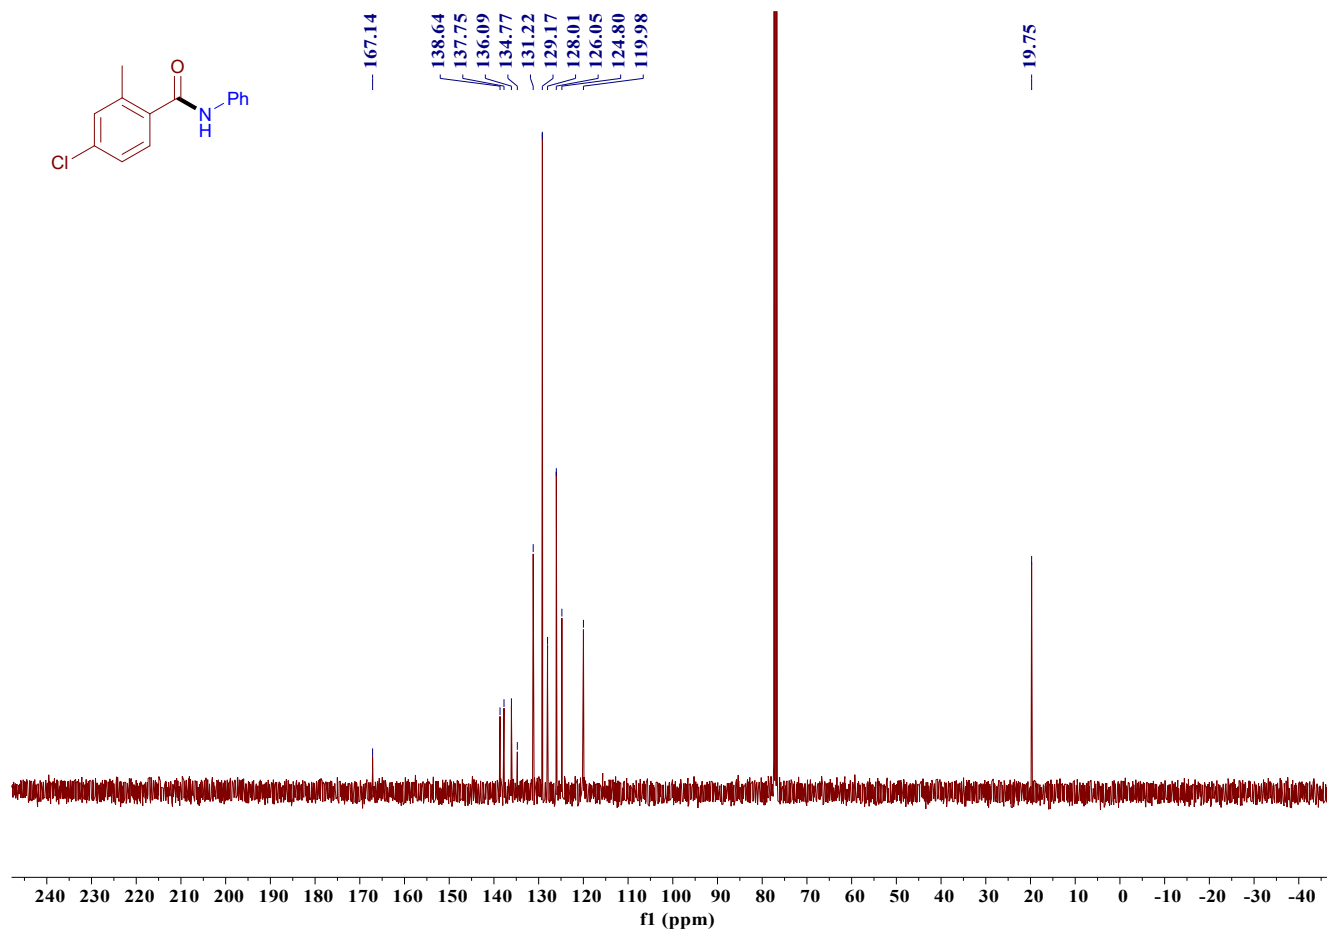

$^1\text{H}$  NMR (400 MHz,  $\text{CDCl}_3$ ),  $^{13}\text{C}$  NMR (100 MHz,  $\text{CDCl}_3$ ) of product 3ra

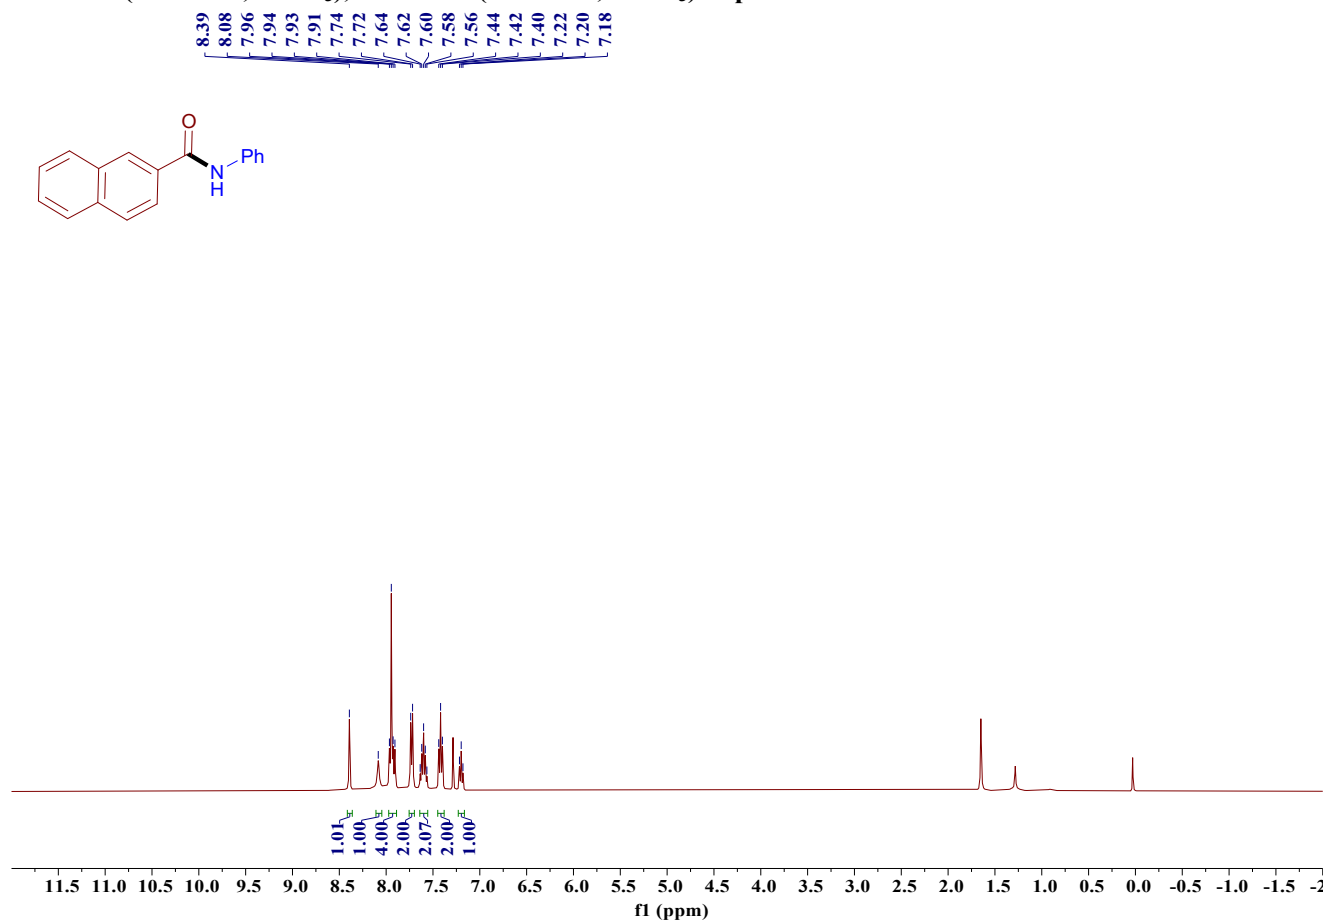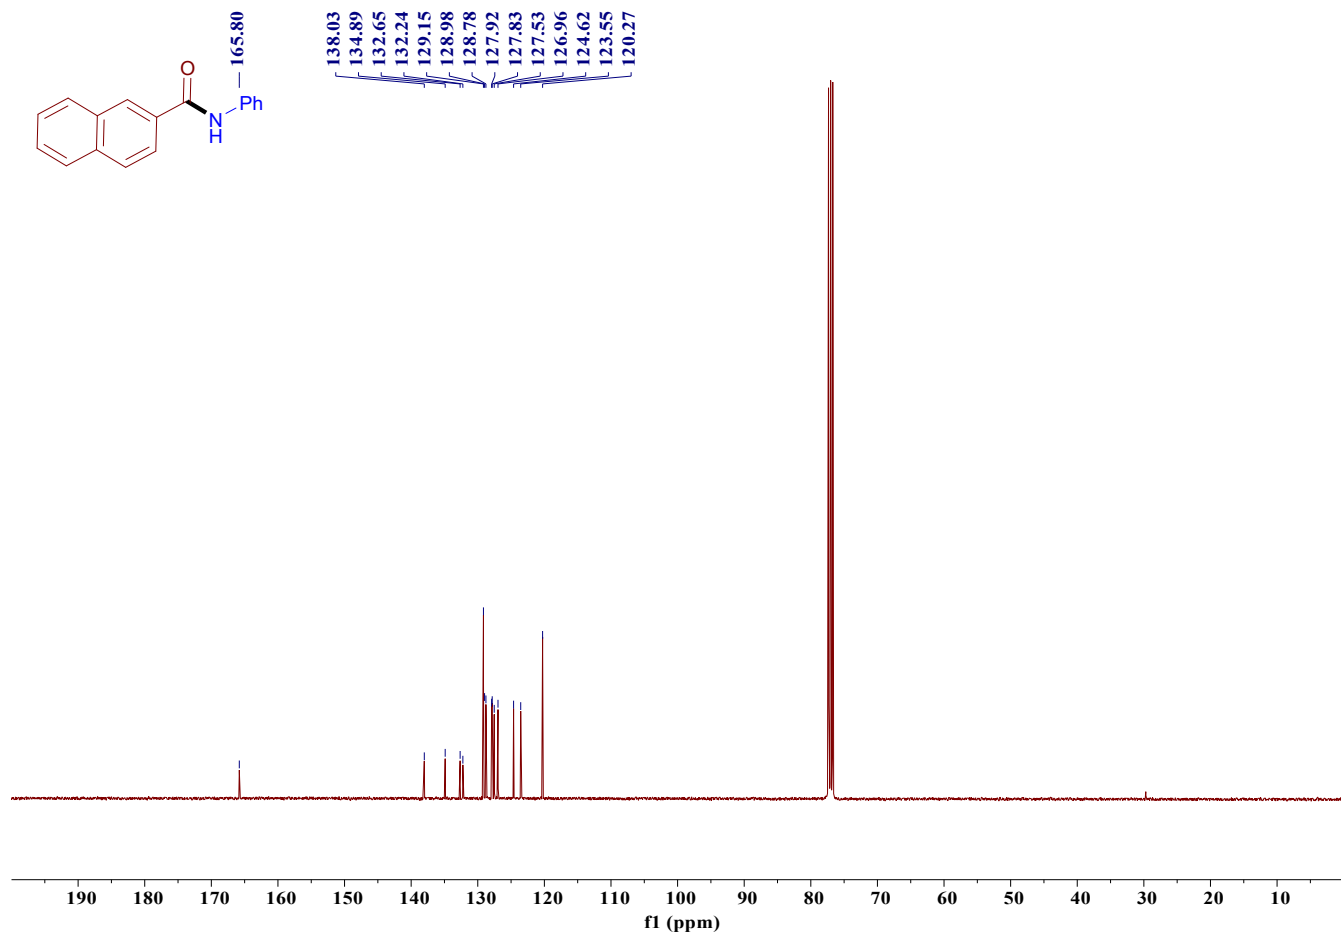

$^1\text{H}$  NMR (400 MHz,  $\text{CDCl}_3$ ),  $^{13}\text{C}$  NMR (100 MHz,  $\text{CDCl}_3$ ) of product 3sa

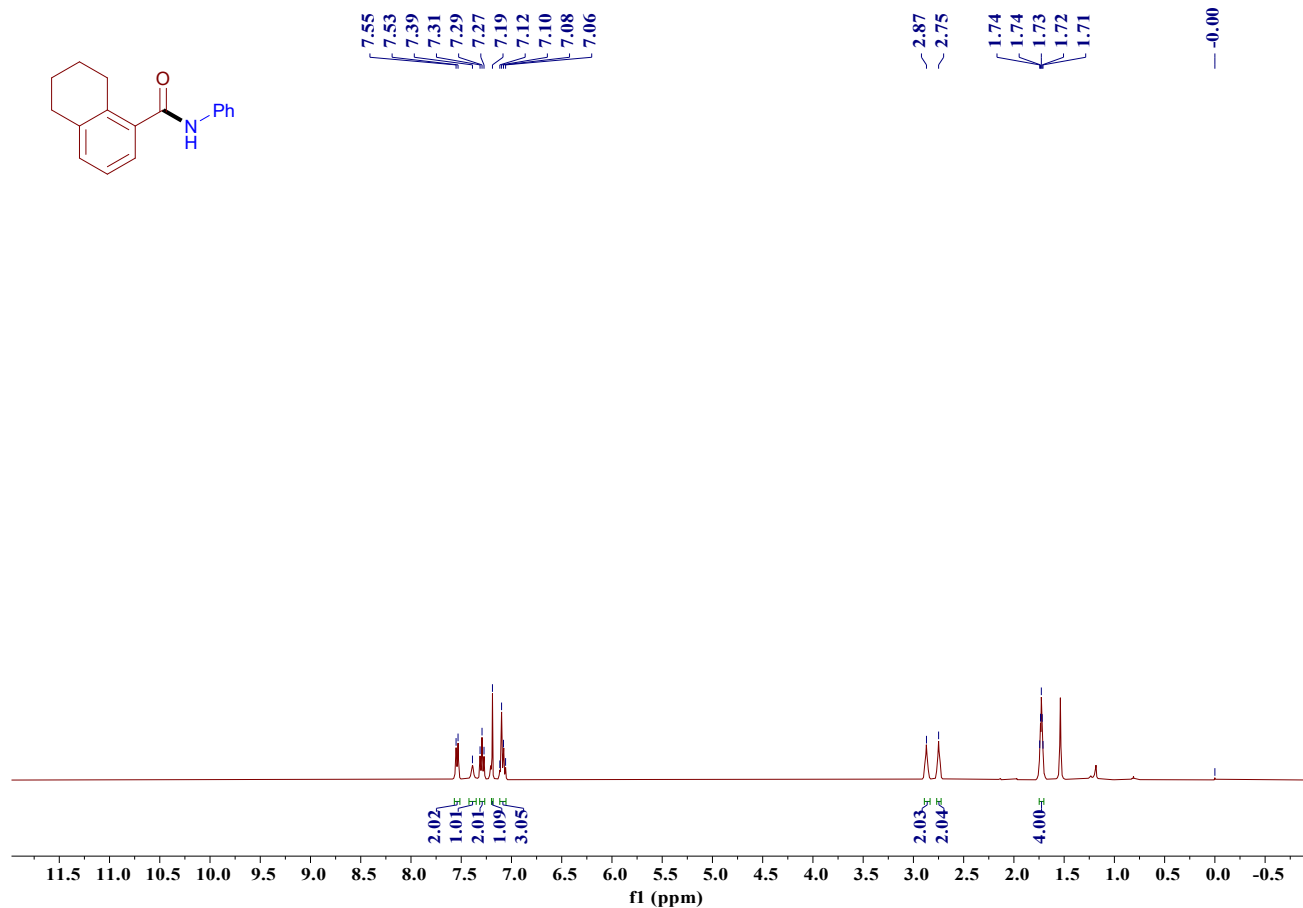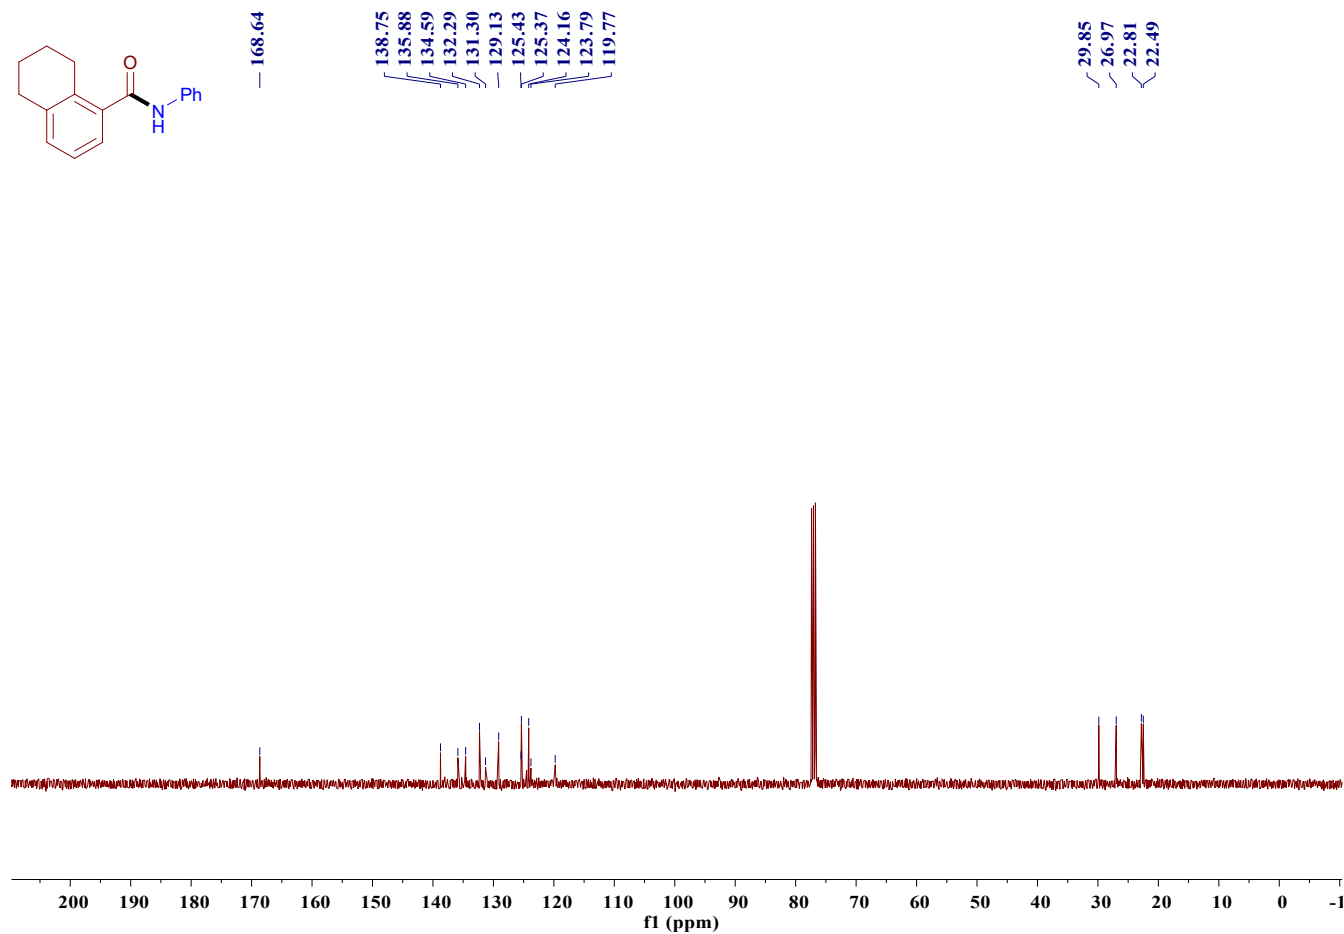

<sup>1</sup>H NMR (400 MHz, CDCl<sub>3</sub>), <sup>13</sup>C NMR (100 MHz, CDCl<sub>3</sub>) of product 3ta

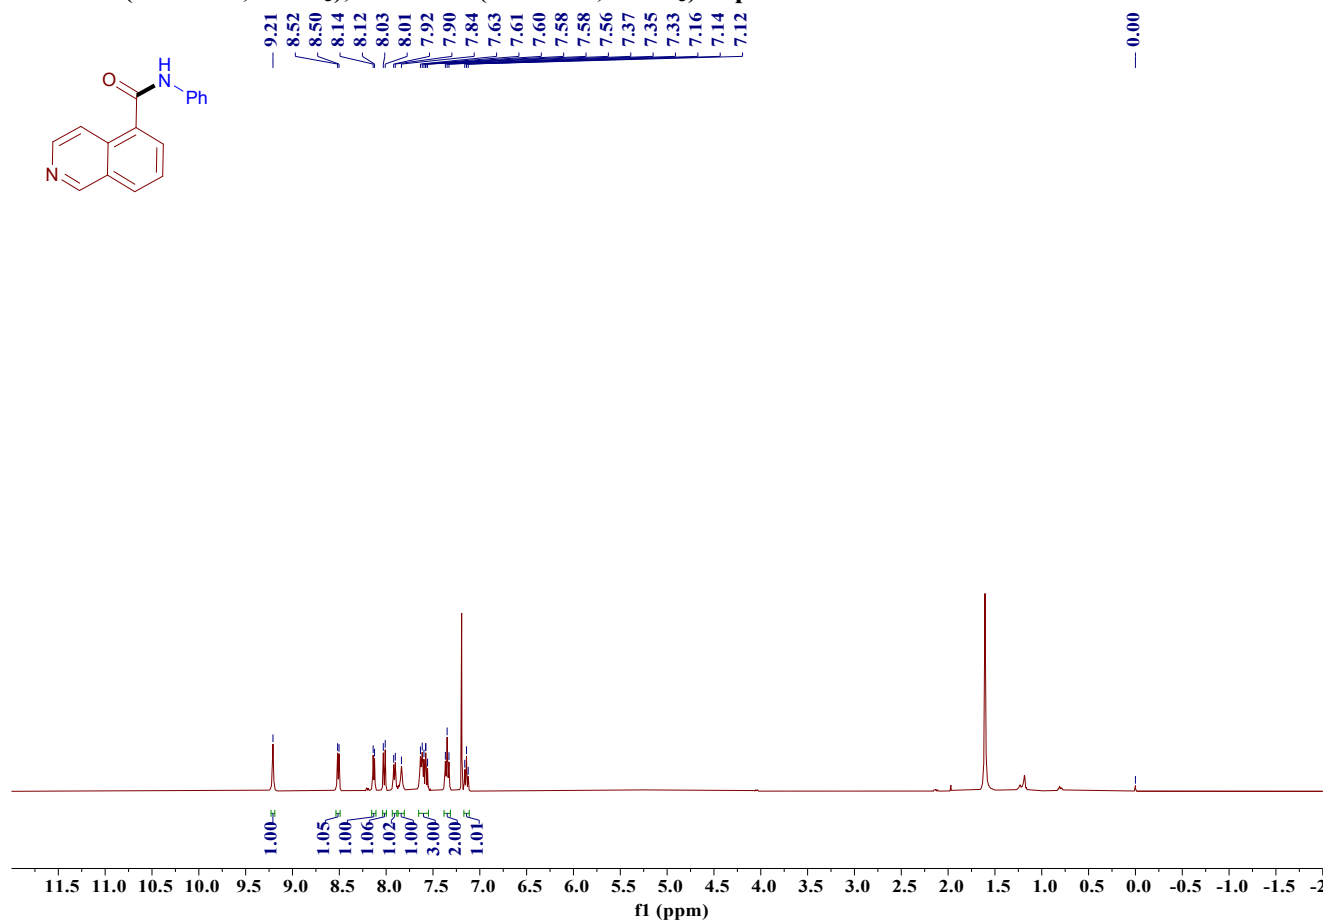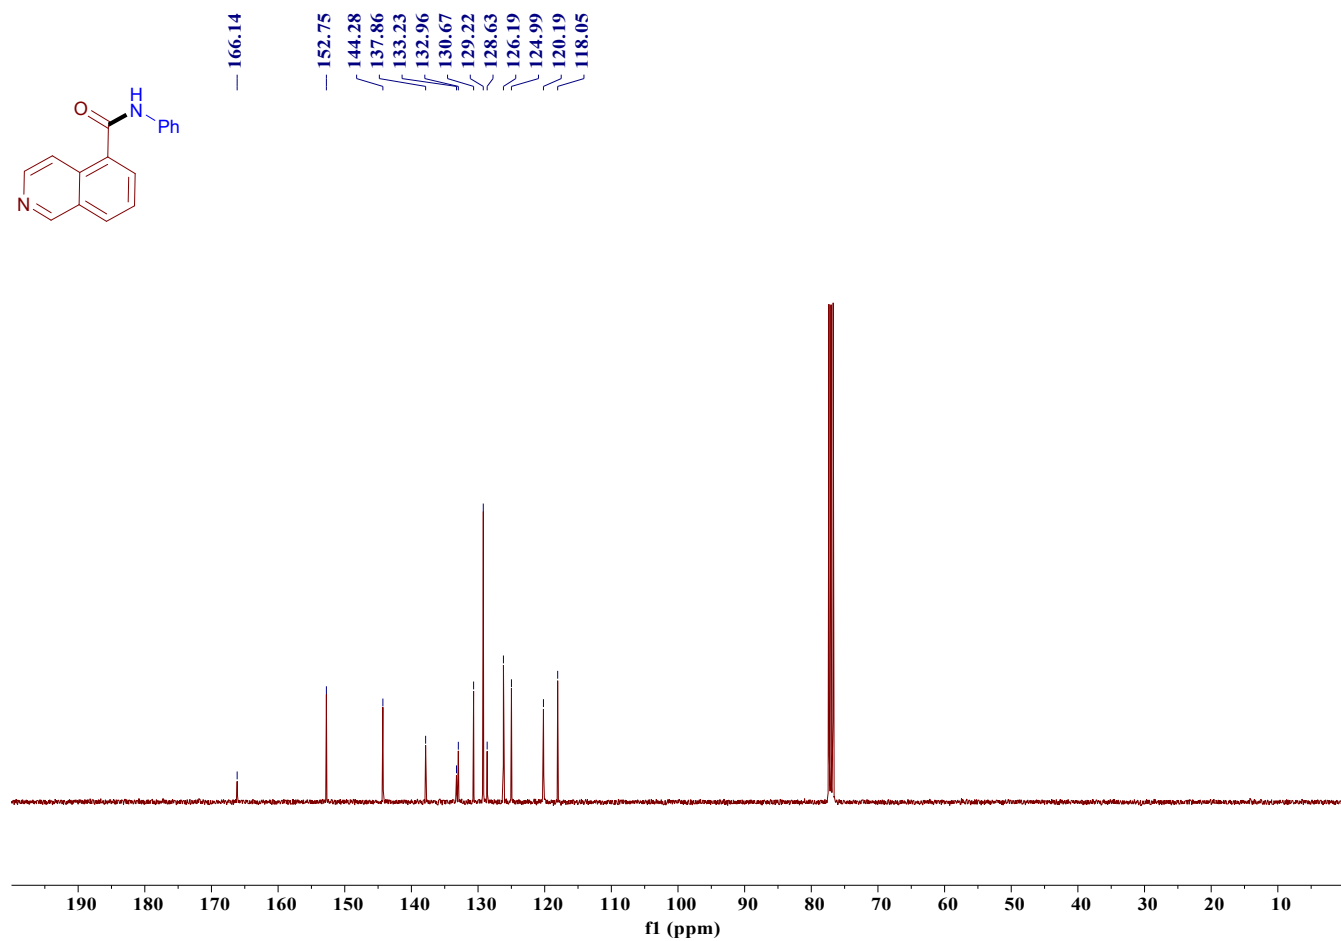

$^1\text{H}$  NMR (400 MHz,  $\text{CDCl}_3$ ),  $^{13}\text{C}$  NMR (100 MHz,  $\text{CDCl}_3$ ) of product 3ua

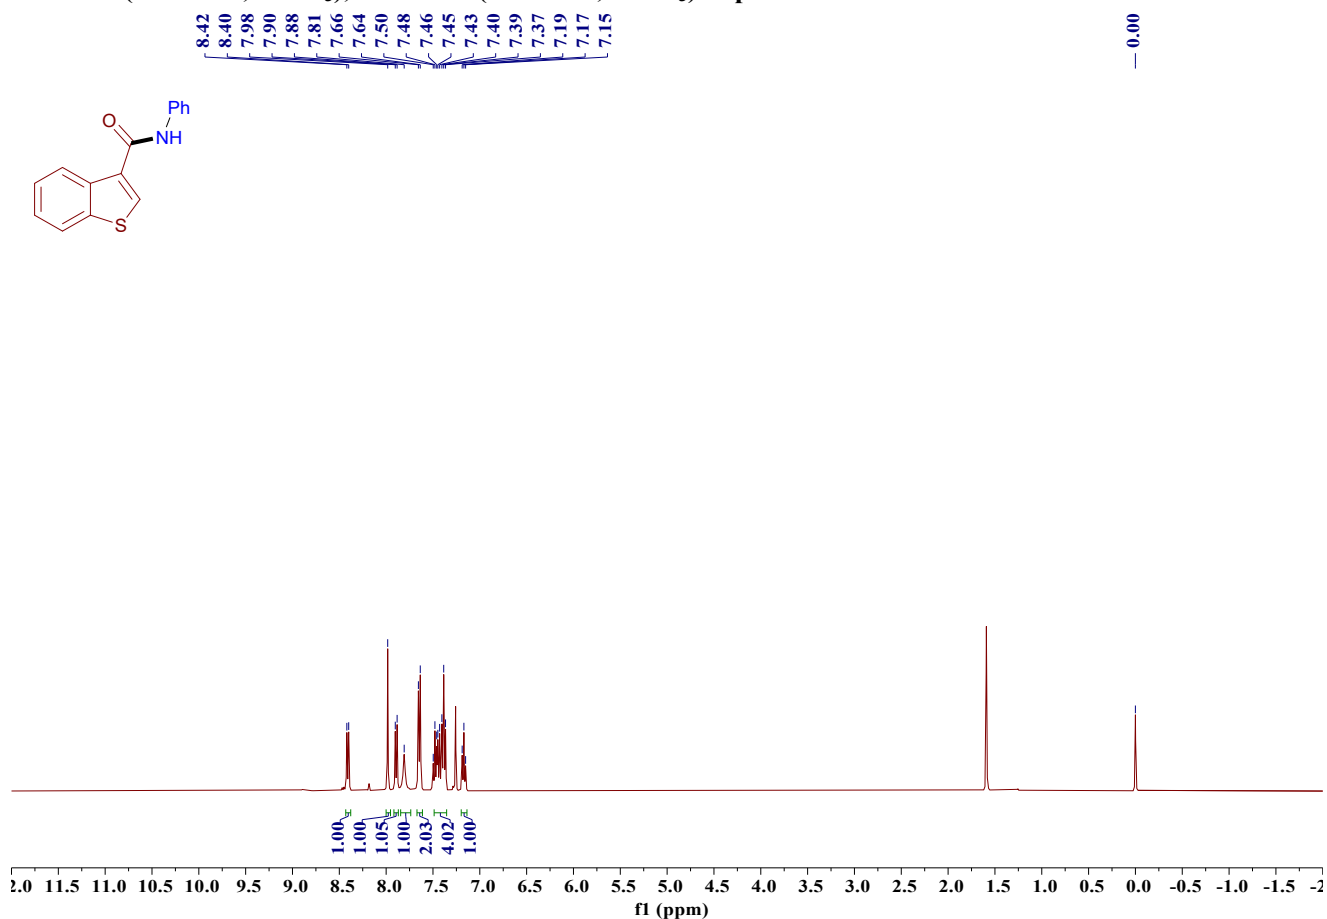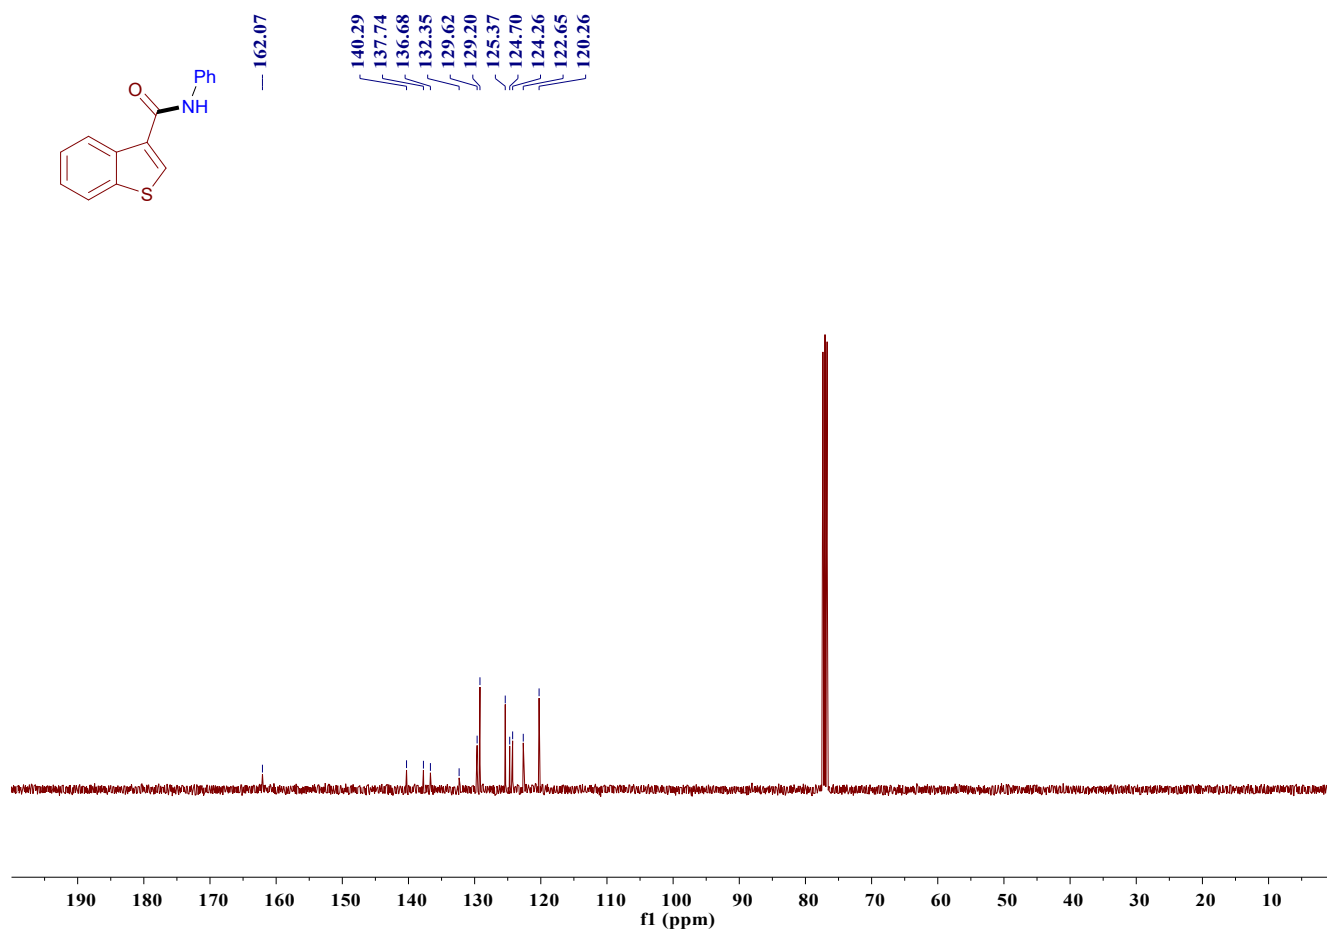



$^1\text{H}$  NMR (400 MHz,  $\text{CDCl}_3$ ),  $^{13}\text{C}$  NMR (100 MHz,  $\text{CDCl}_3$ ) of product 3va

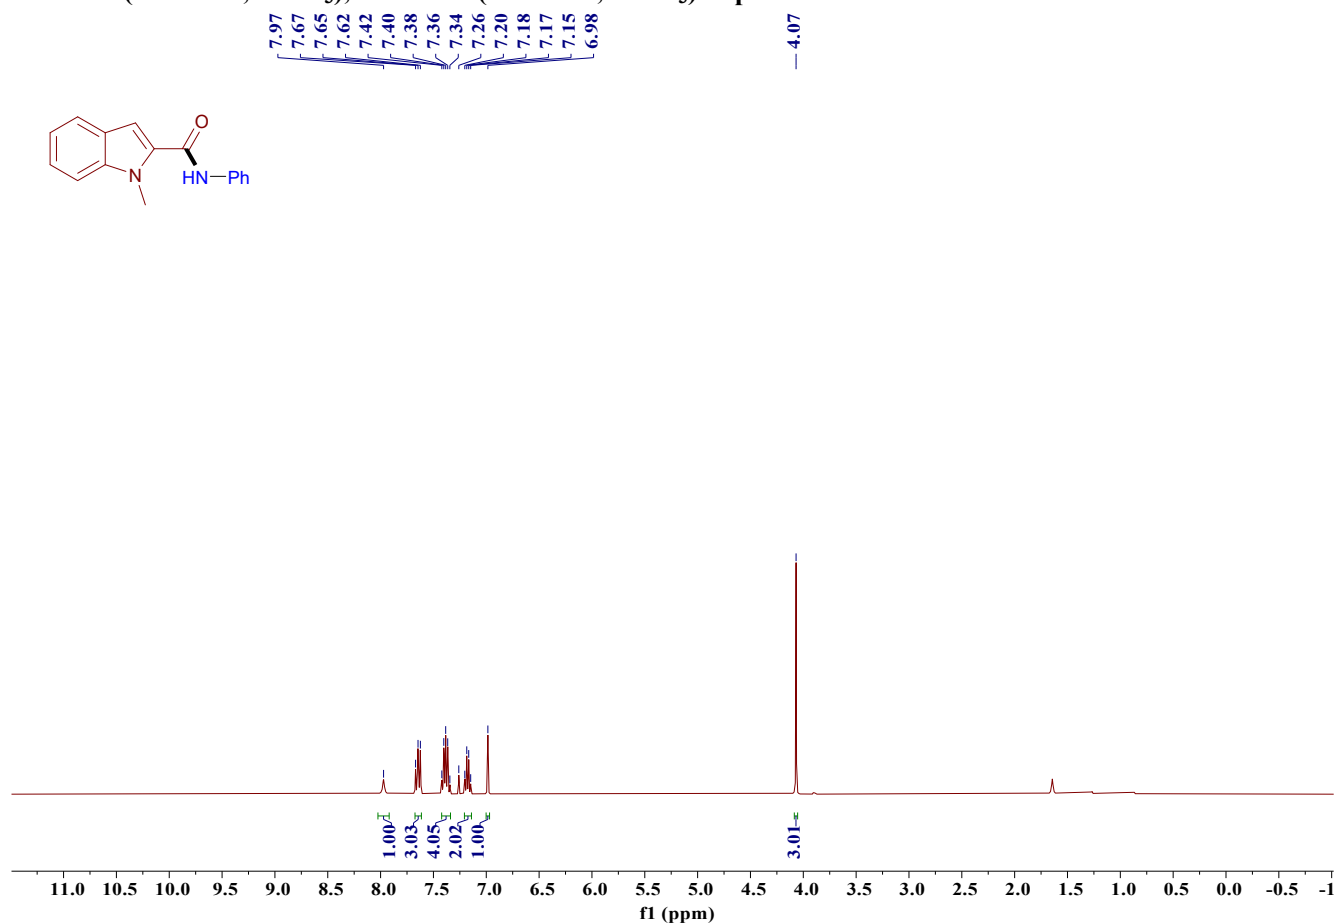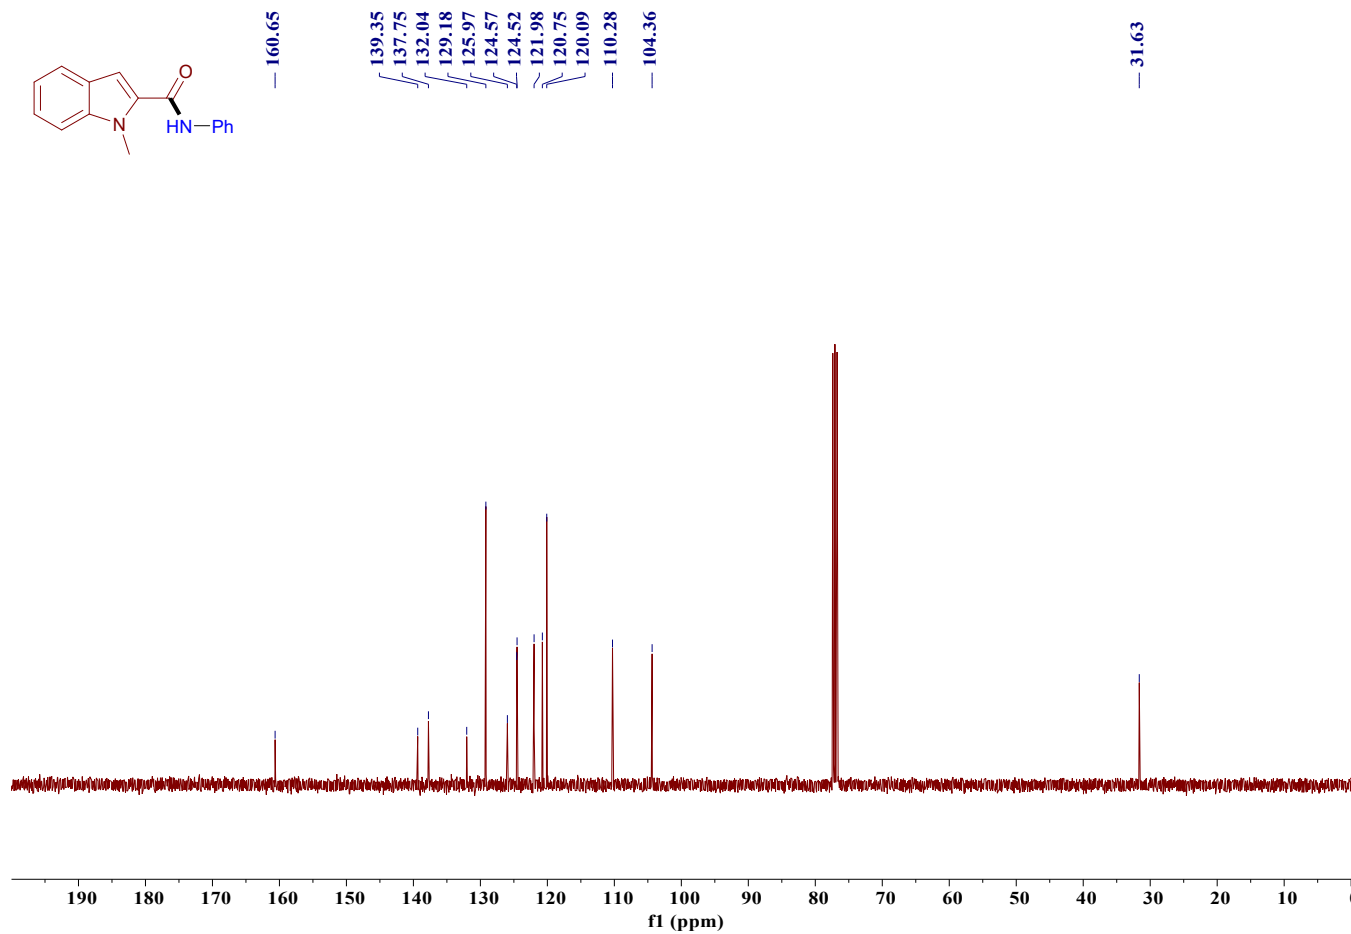

$^1\text{H}$  NMR (400 MHz,  $\text{CDCl}_3$ ),  $^{13}\text{C}$  NMR (100 MHz,  $\text{CDCl}_3$ ) of product 3wa

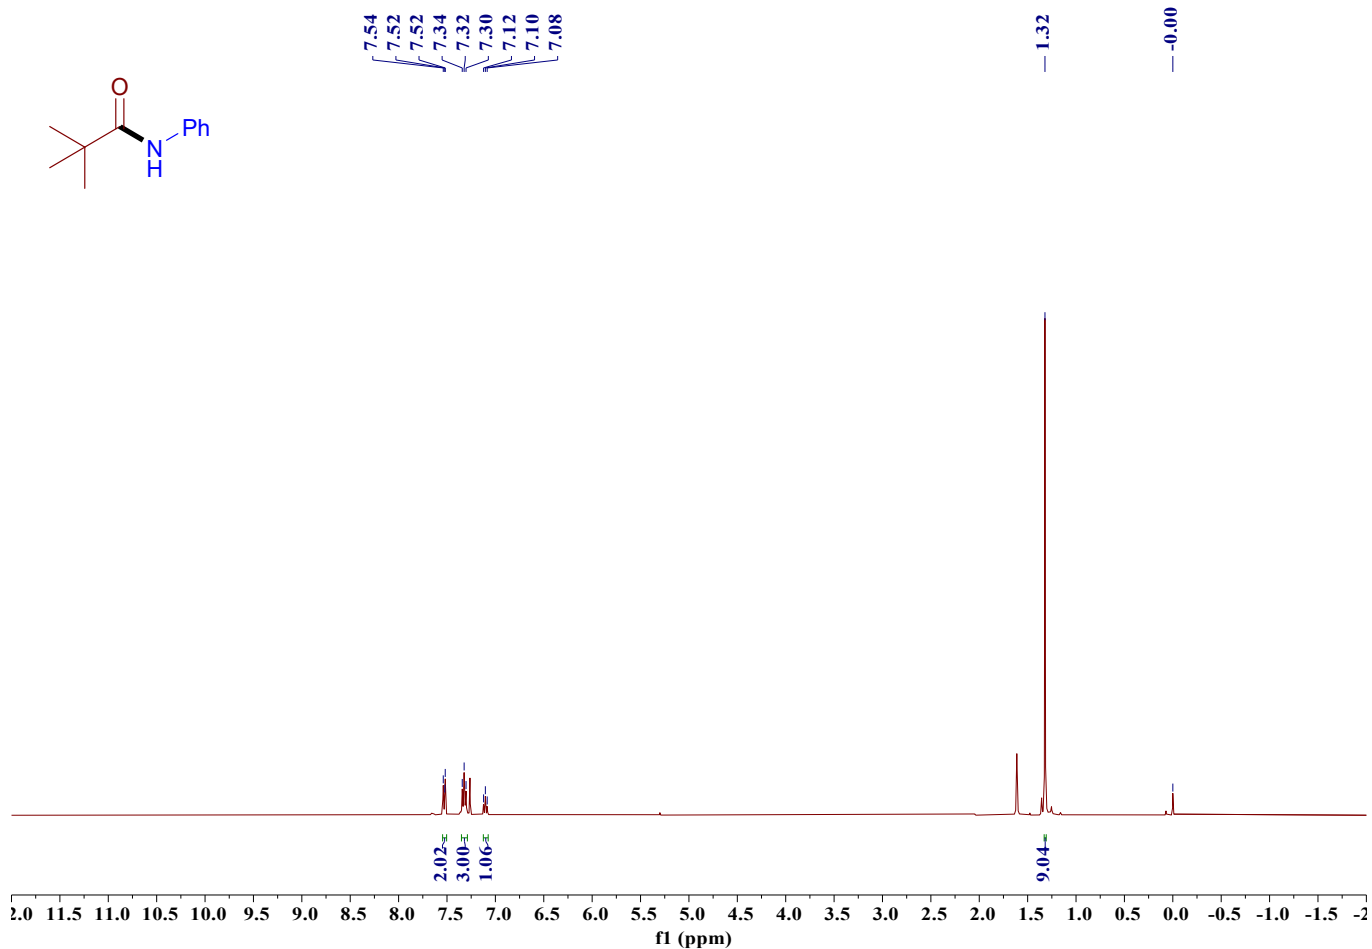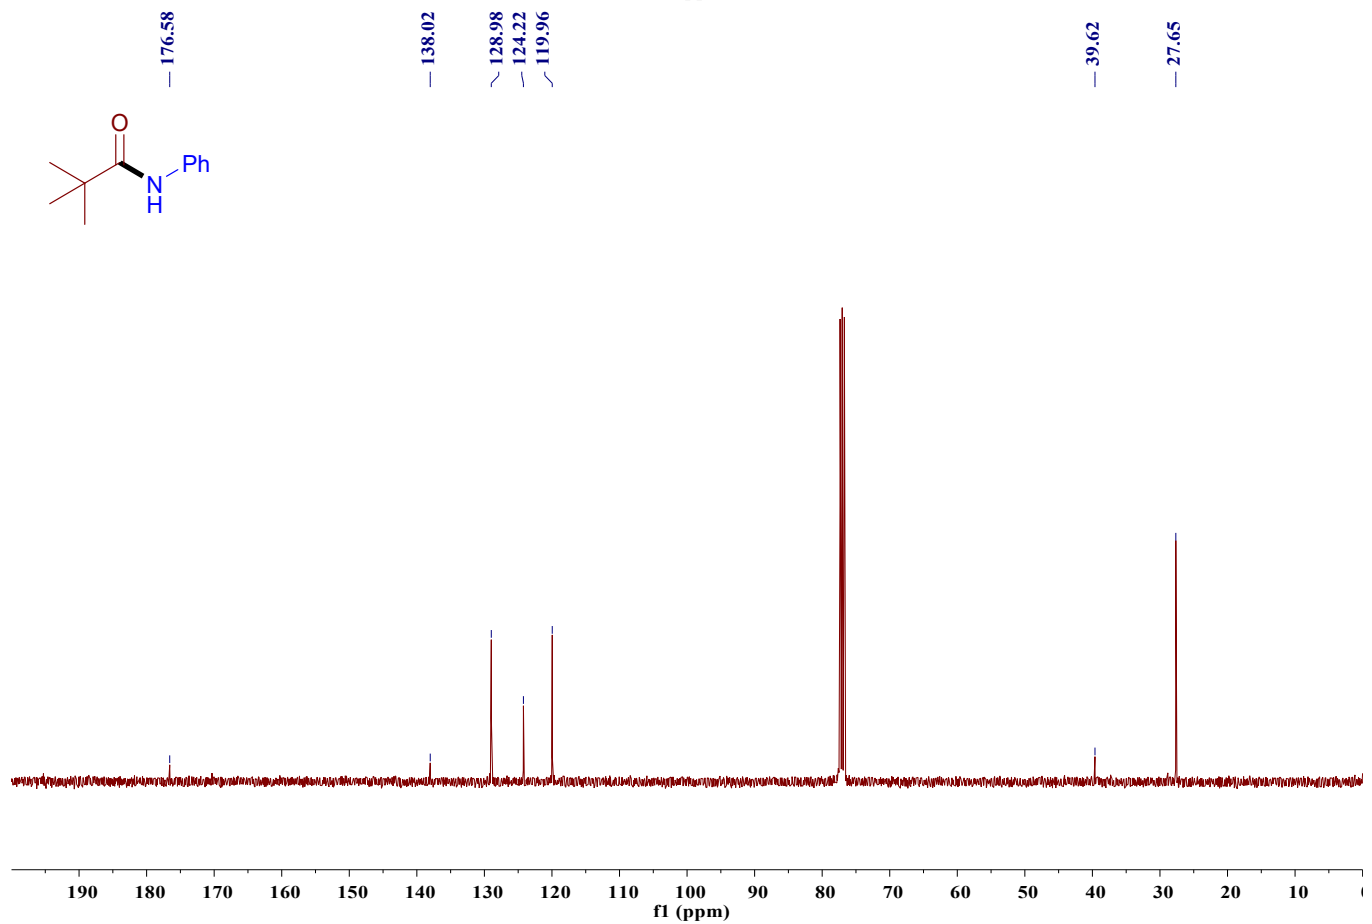

$^1\text{H}$  NMR (400 MHz,  $\text{CDCl}_3$ ),  $^{13}\text{C}$  NMR (100 MHz,  $\text{CDCl}_3$ ) of product 3xa

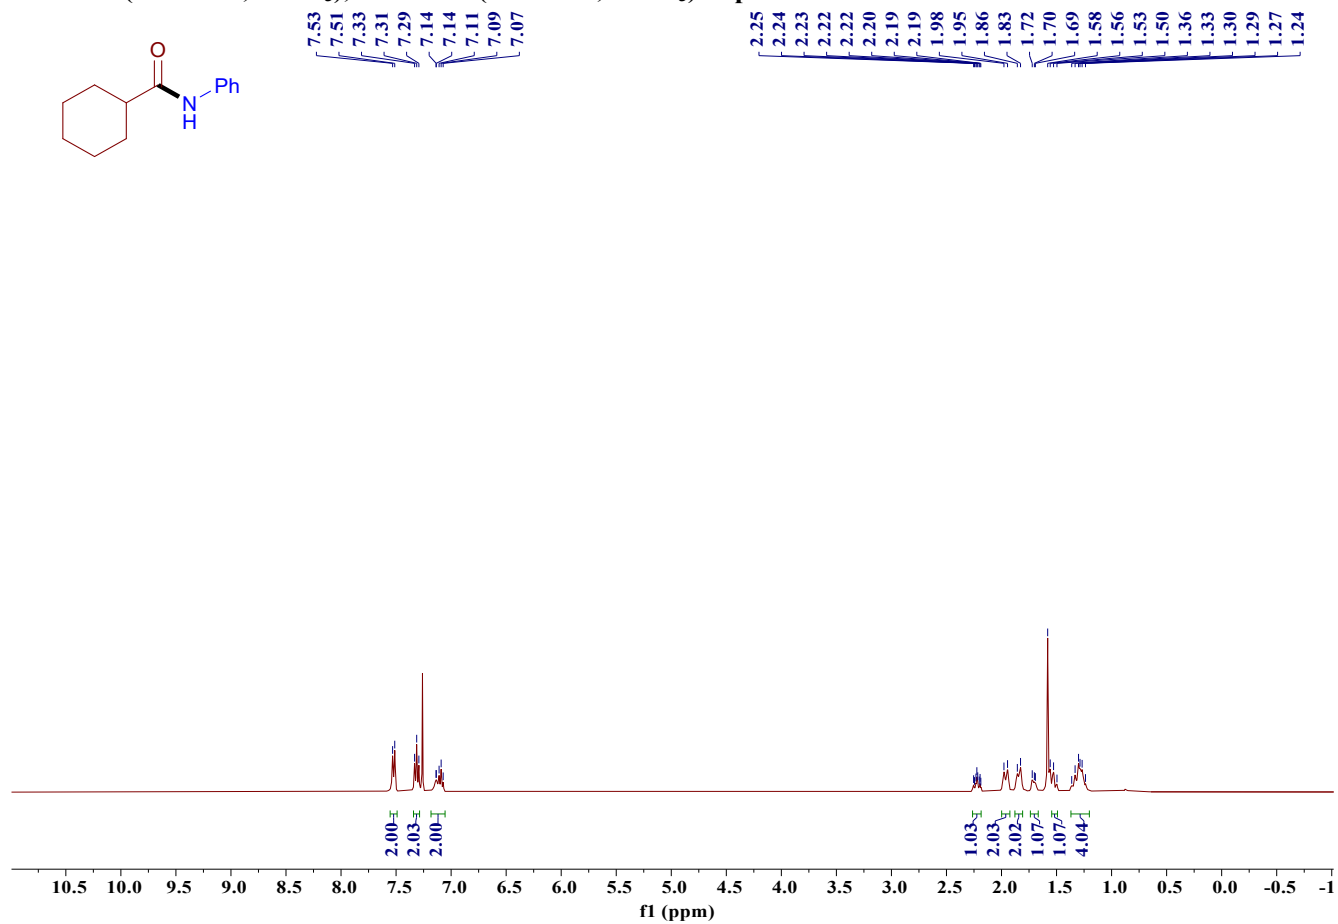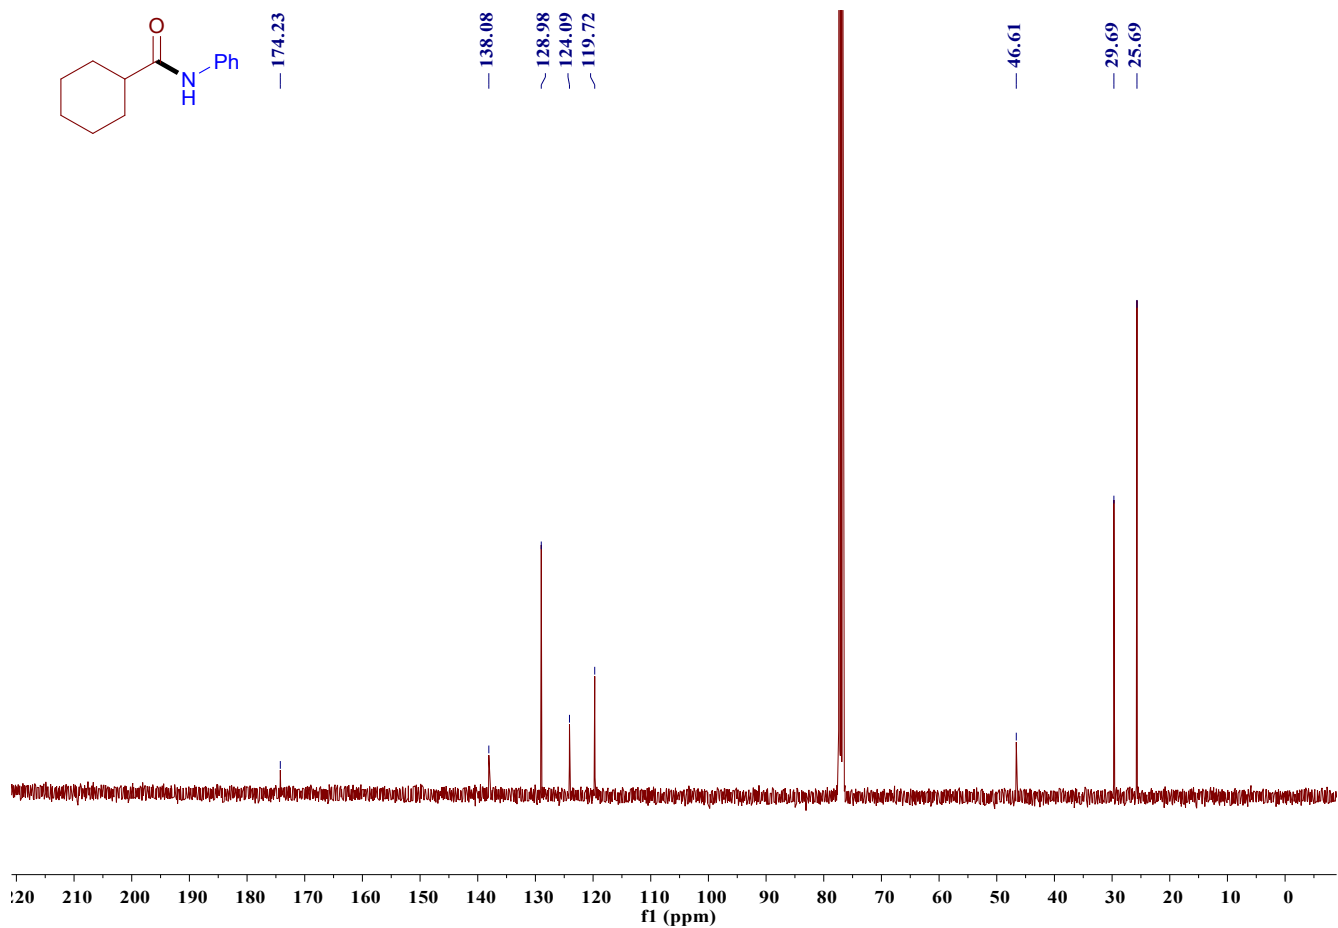

$^1\text{H}$  NMR (400 MHz,  $\text{CDCl}_3$ ),  $^{13}\text{C}$  NMR (100 MHz,  $\text{CDCl}_3$ ) of product 3ya

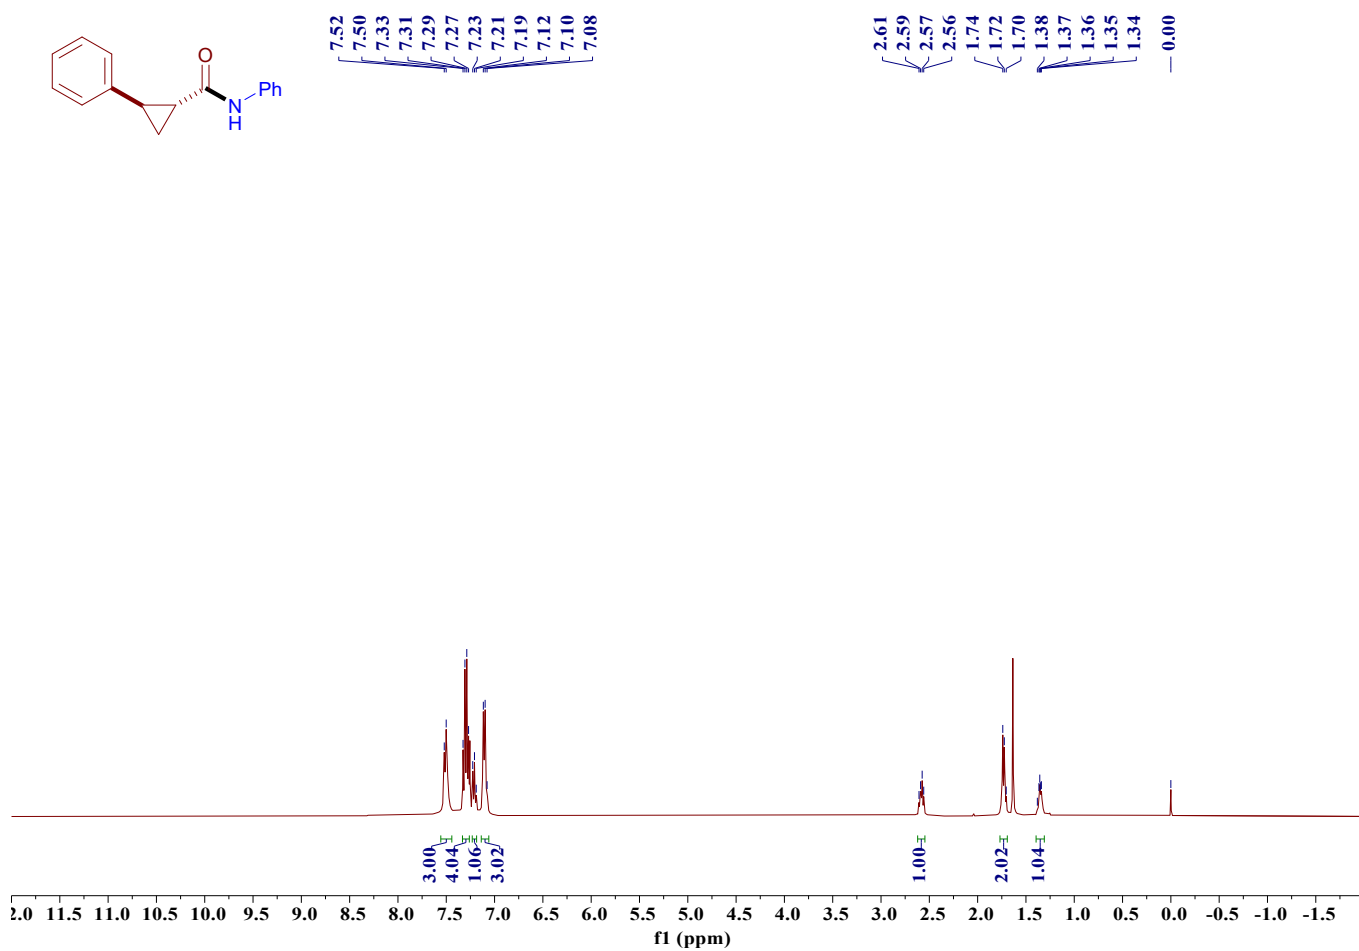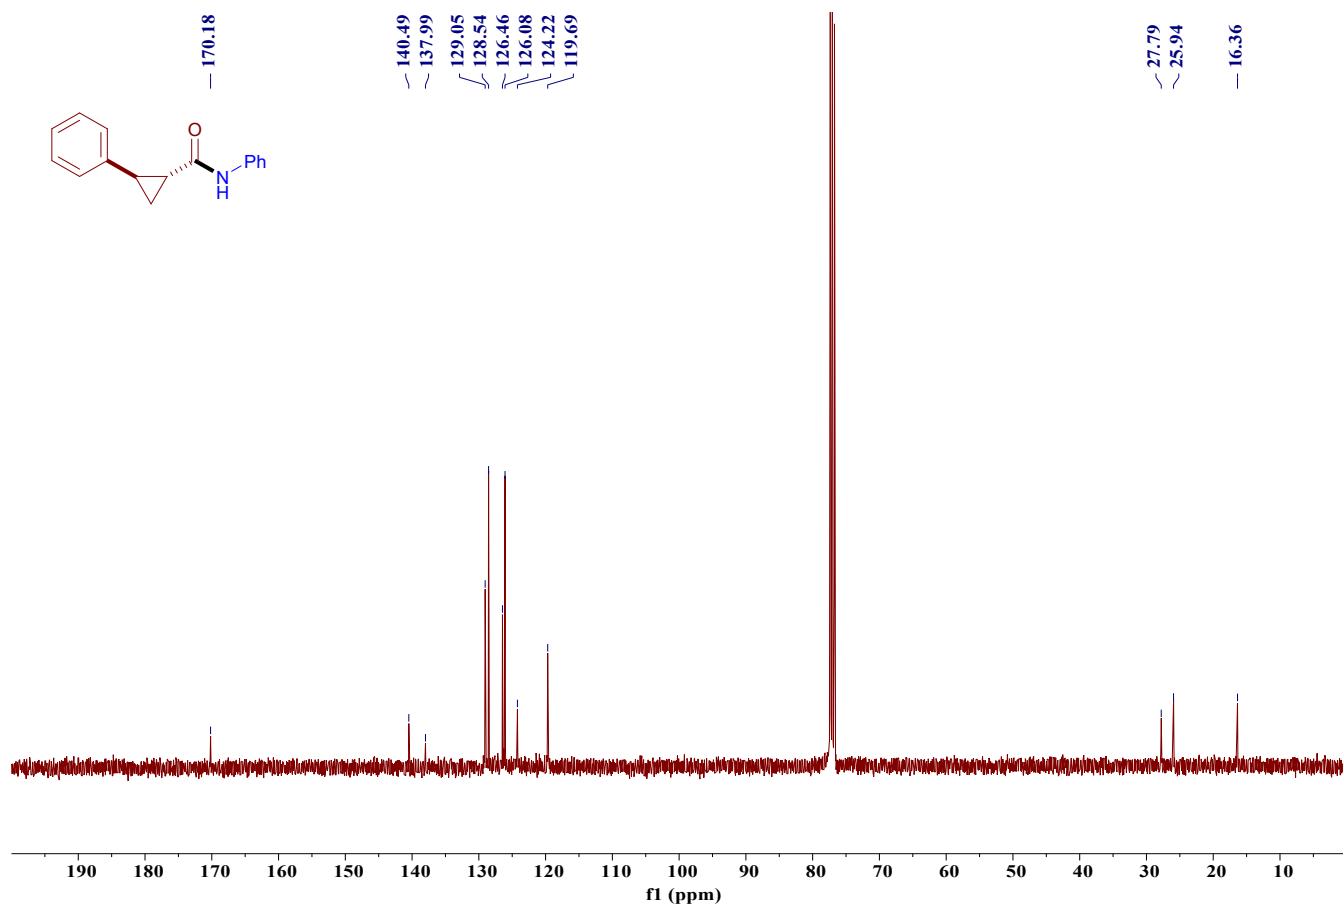

$^1\text{H}$  NMR (400 MHz,  $\text{CDCl}_3$ ),  $^{13}\text{C}$  NMR (100 MHz,  $\text{CDCl}_3$ ) of product 3za

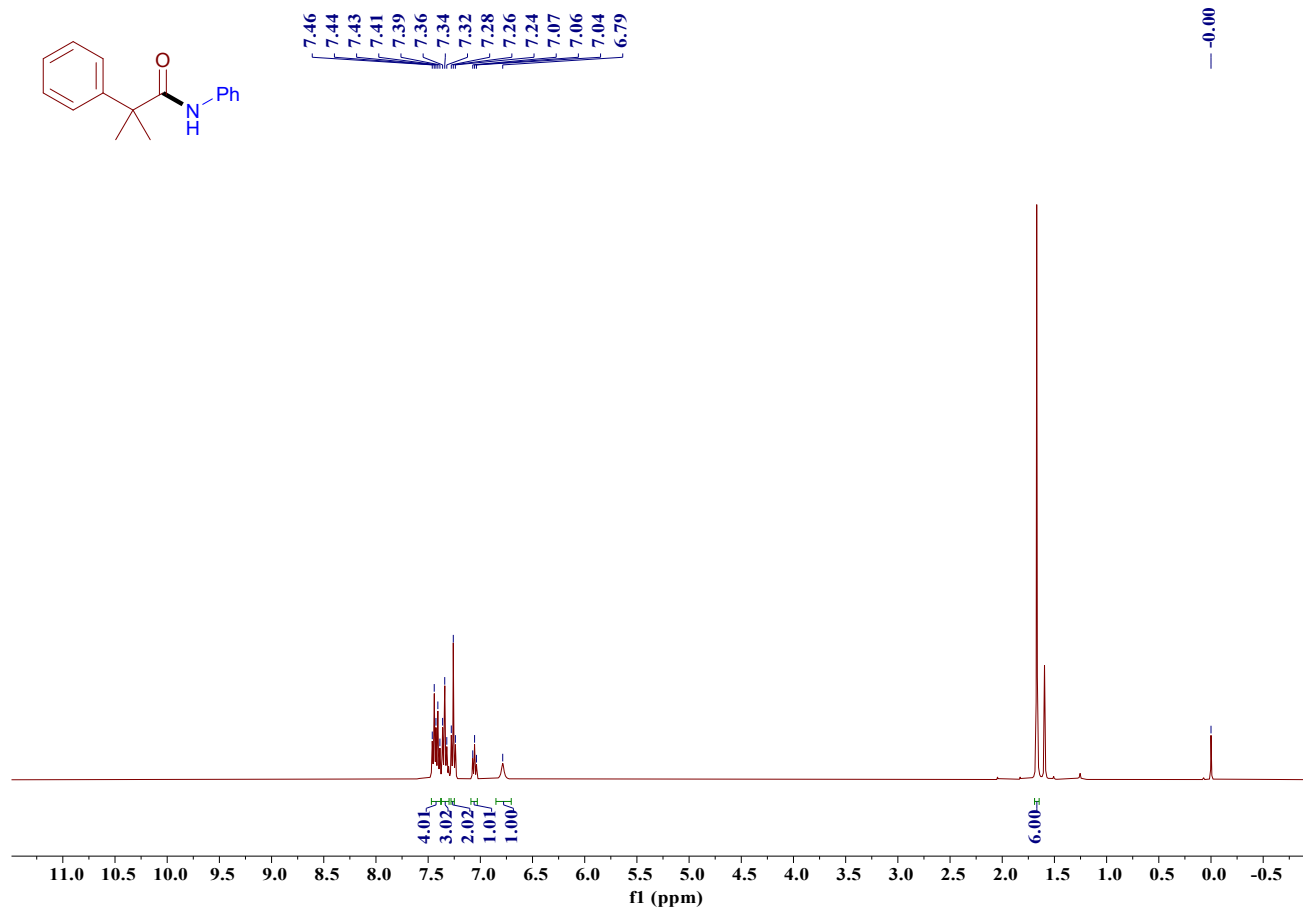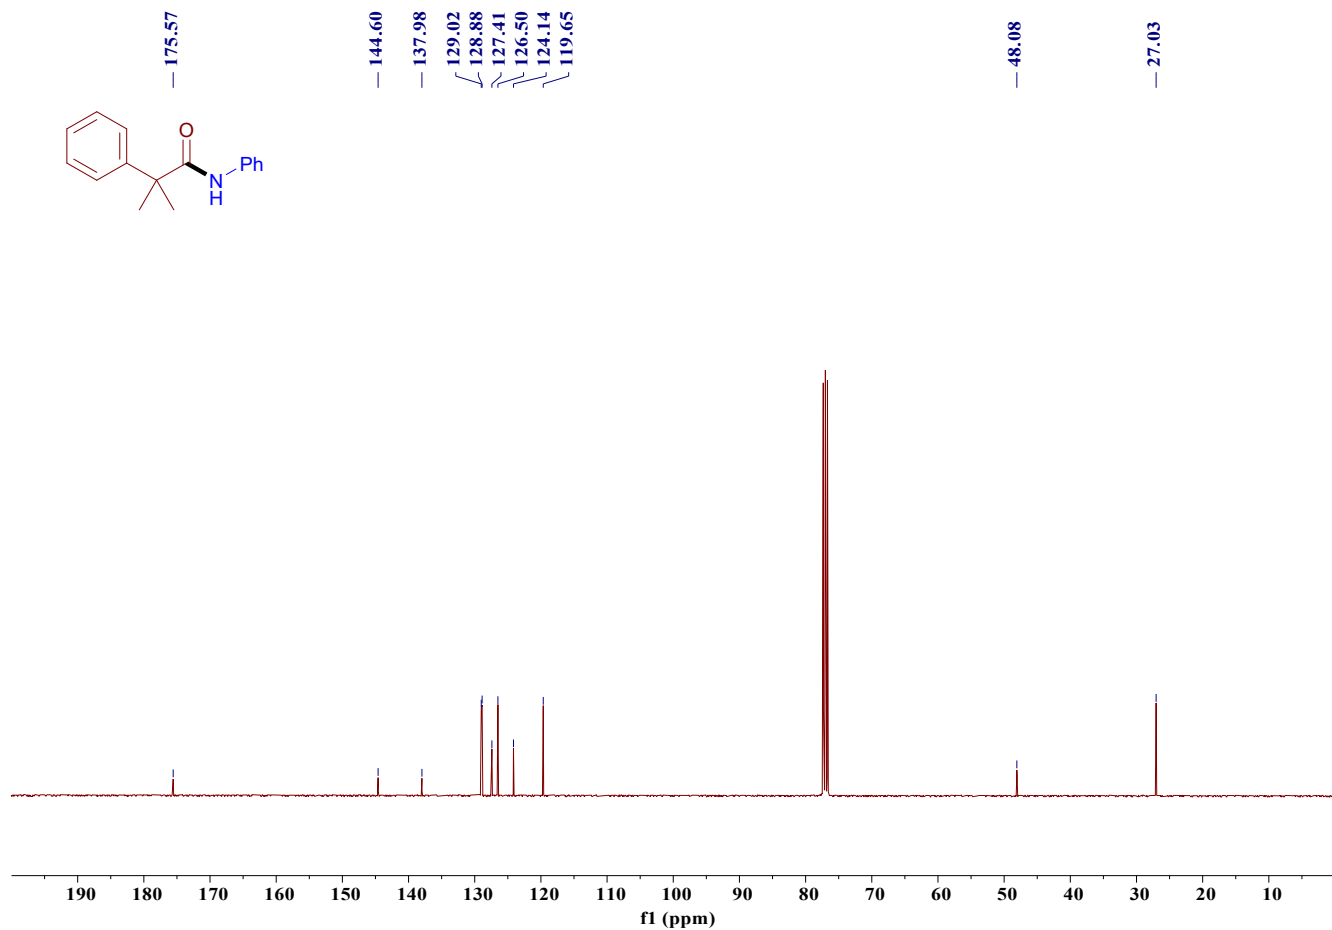

$^1\text{H}$  NMR (400 MHz,  $\text{CDCl}_3$ ),  $^{13}\text{C}$  NMR (100 MHz,  $\text{CDCl}_3$ ) of product 4

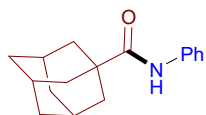

7.55  
7.53  
7.34  
7.32  
7.30  
7.11  
7.10  
7.08

2.11  
1.97  
1.80  
1.76  
1.73

-0.00

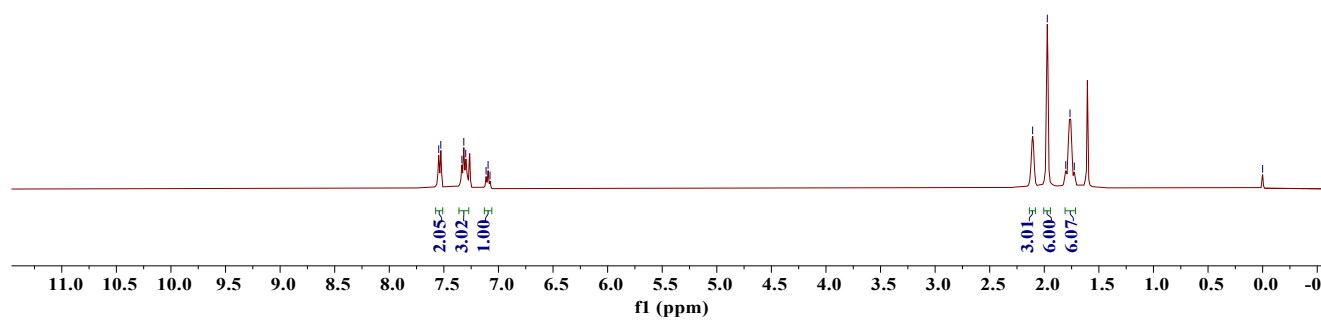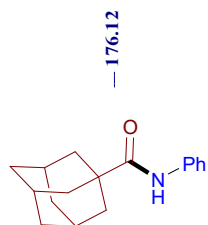

176.12

138.05

128.96

124.13

119.97

41.50

39.28

36.44

28.14

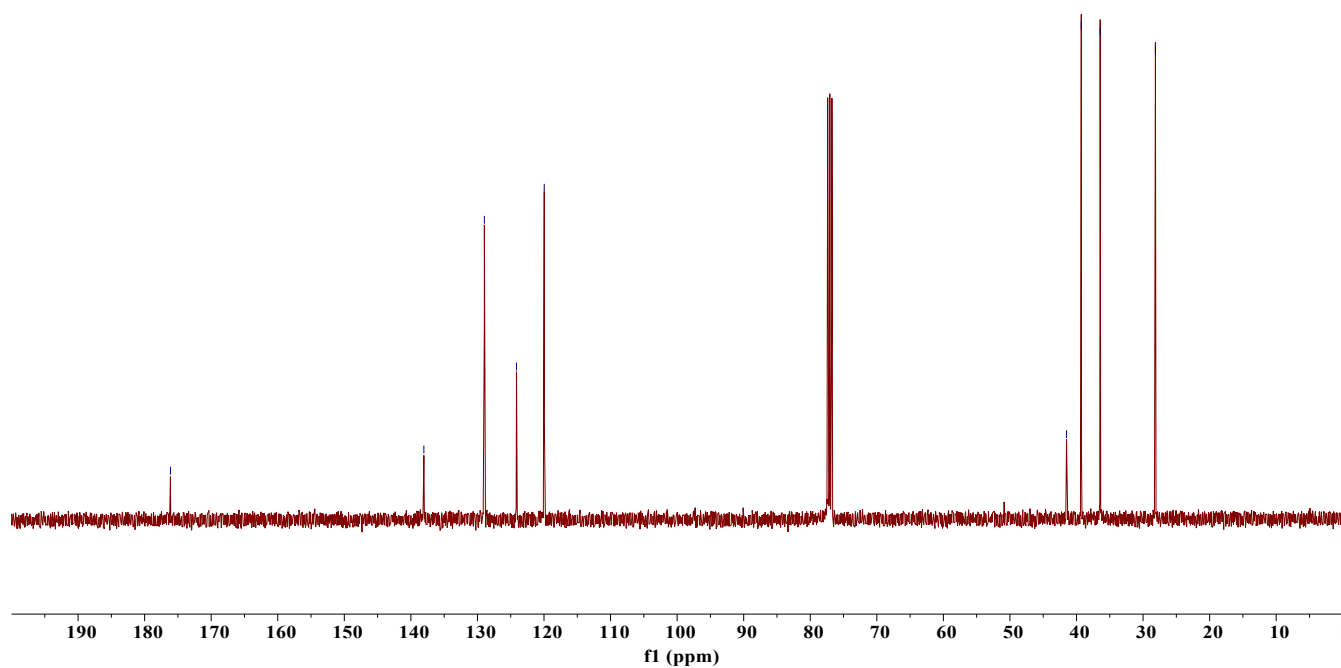

<sup>1</sup>H NMR (400 MHz, CDCl<sub>3</sub>), <sup>13</sup>C NMR (100 MHz, CDCl<sub>3</sub>) of product 5

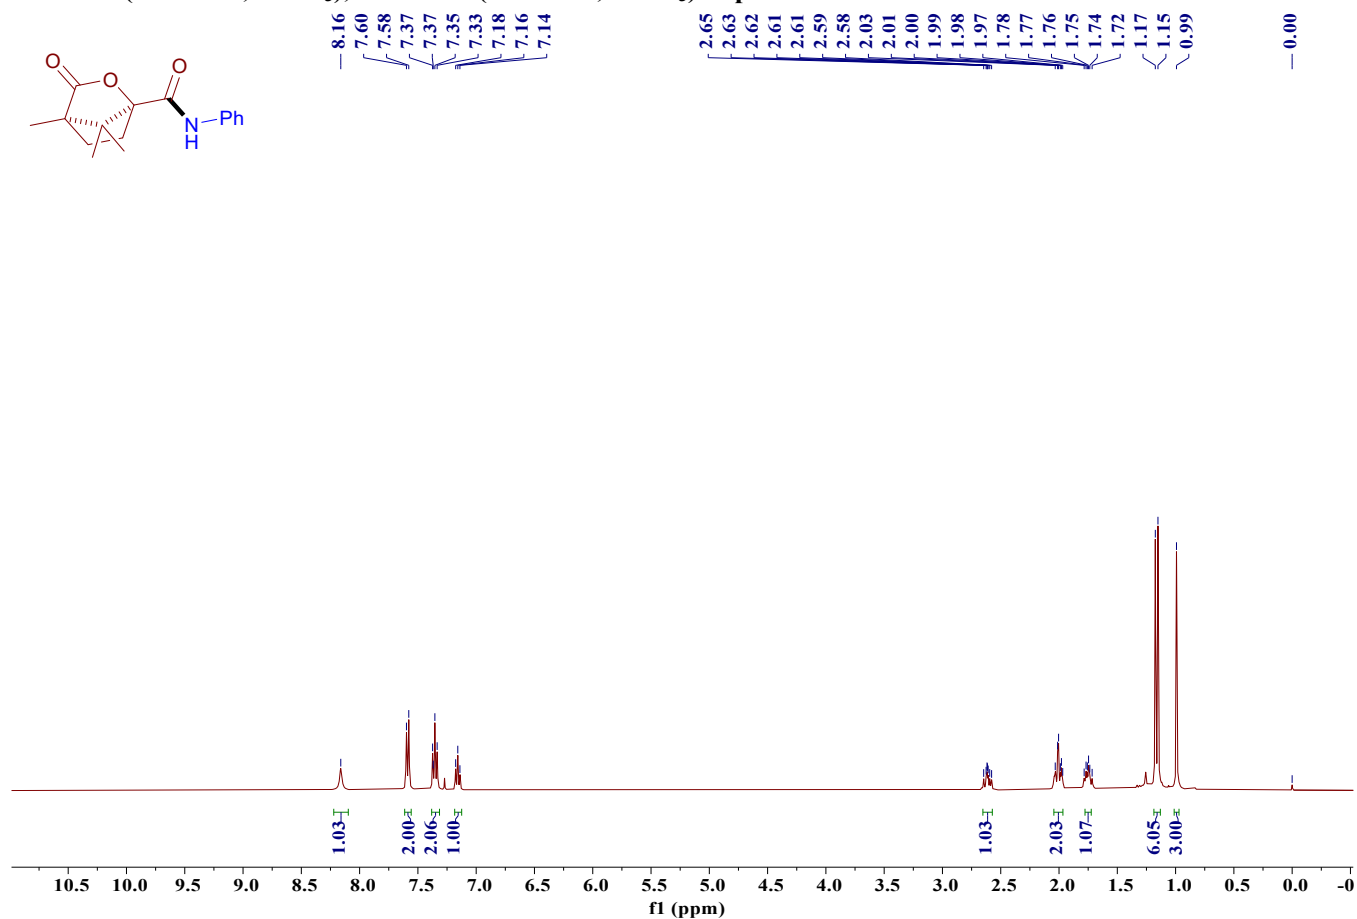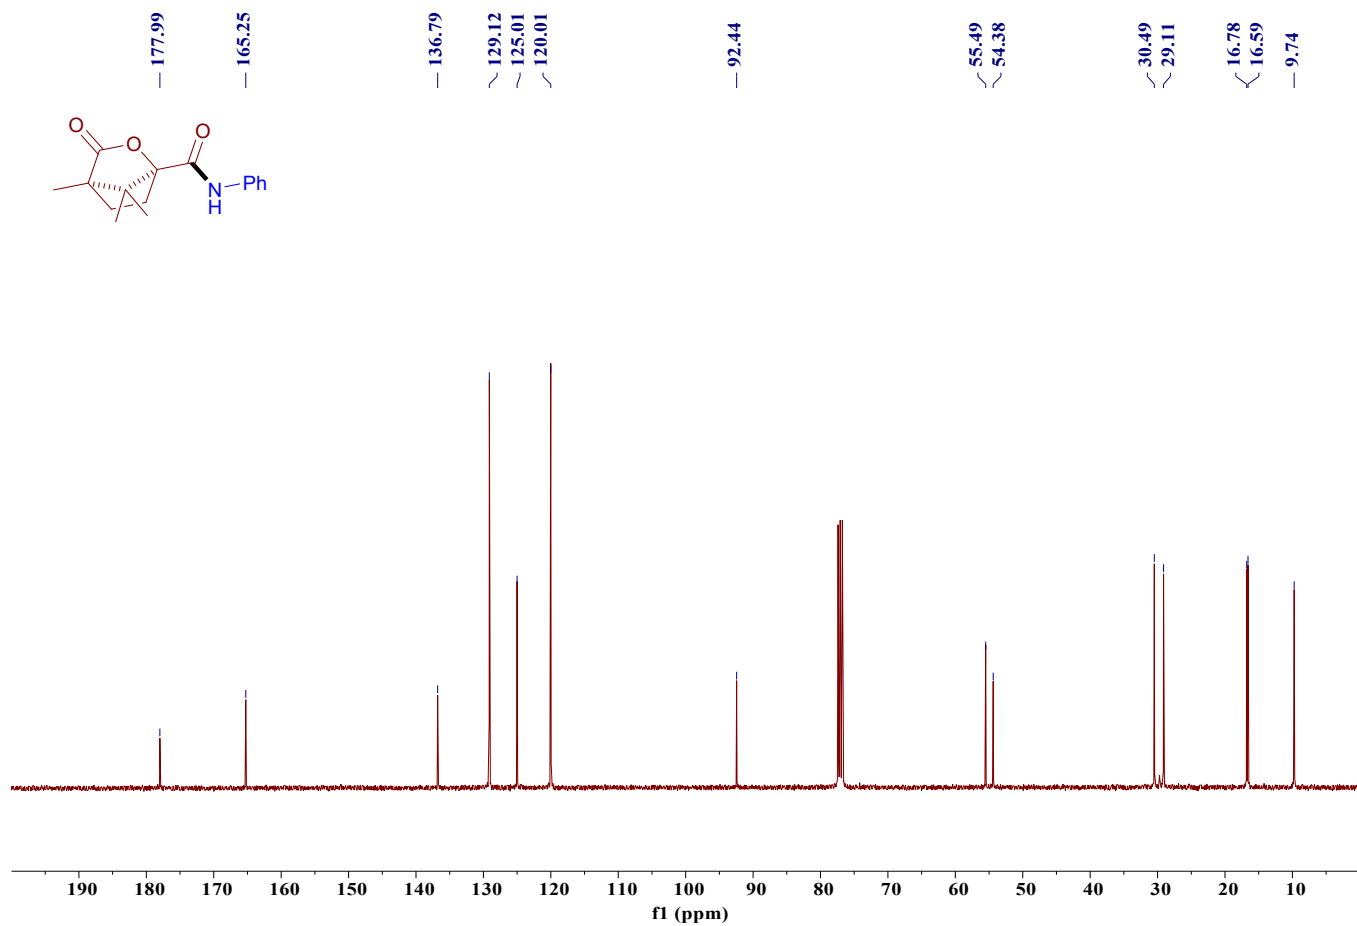

<sup>1</sup>H NMR (400 MHz, CDCl<sub>3</sub>), <sup>13</sup>C NMR (100 MHz, CDCl<sub>3</sub>) of product 3ab

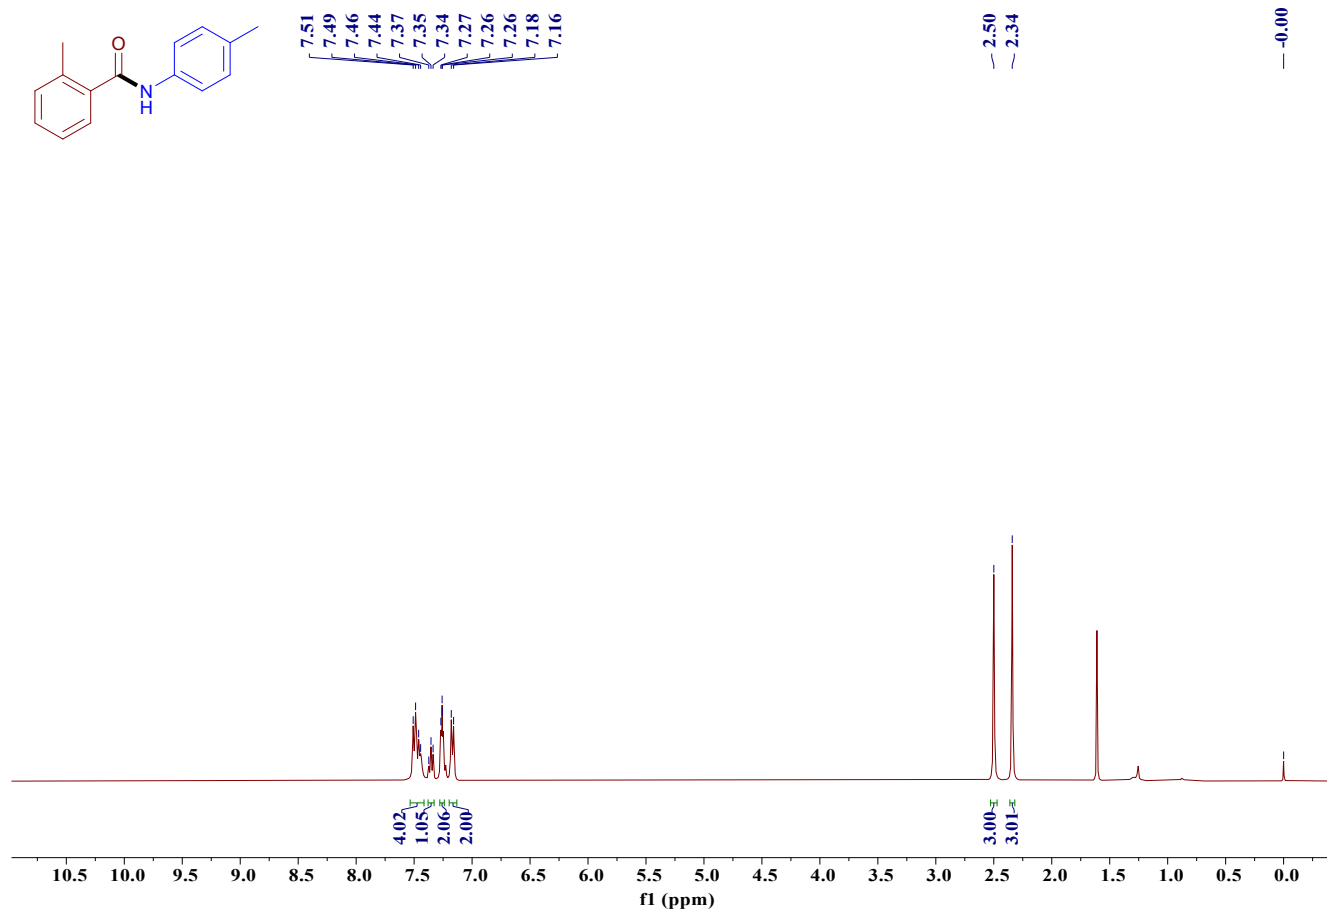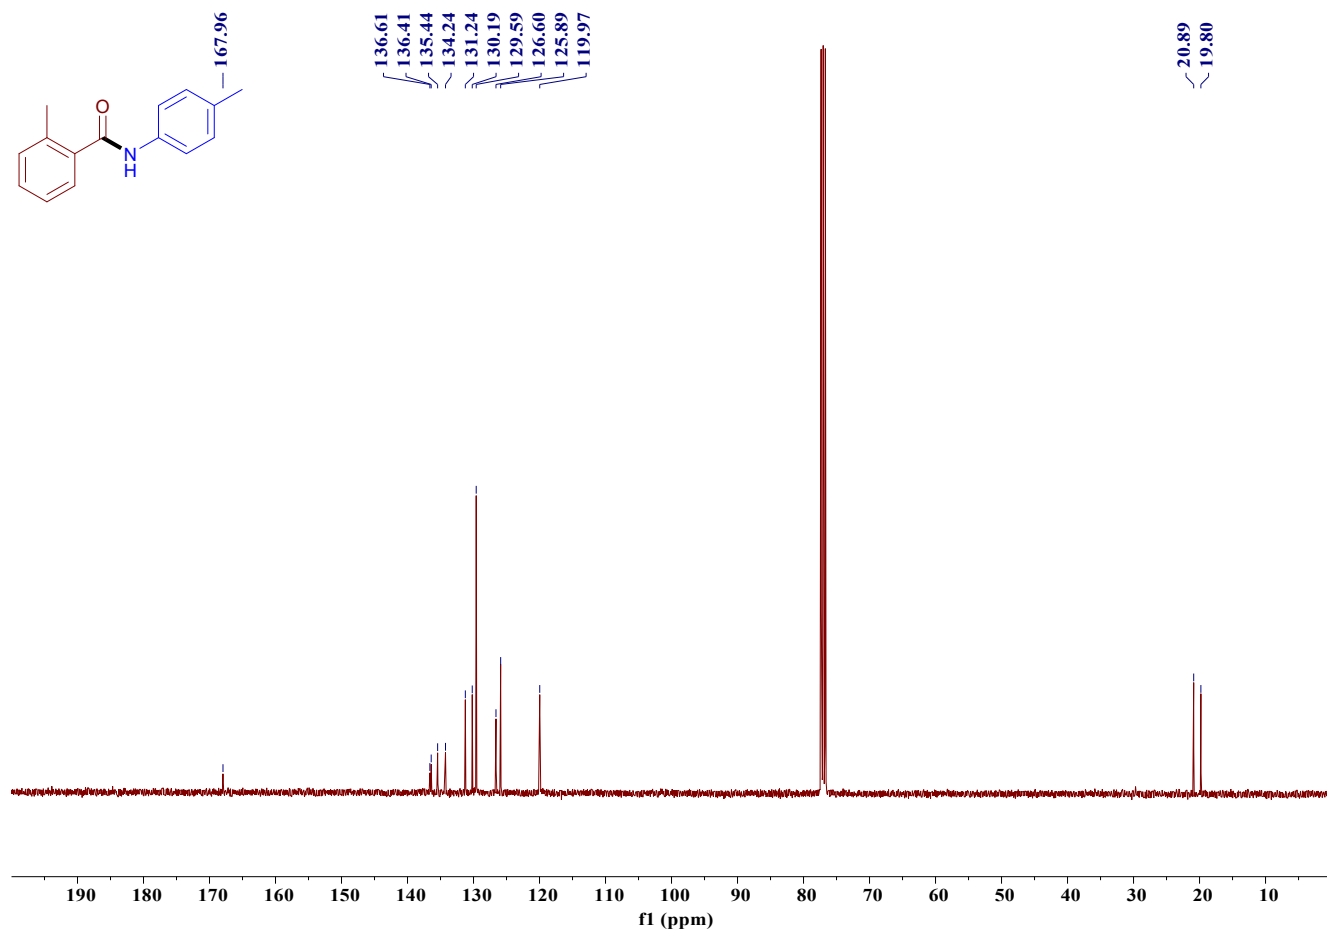



<sup>1</sup>H NMR (400 MHz, CDCl<sub>3</sub>), <sup>13</sup>C NMR (100 MHz, CDCl<sub>3</sub>) of product 3ac

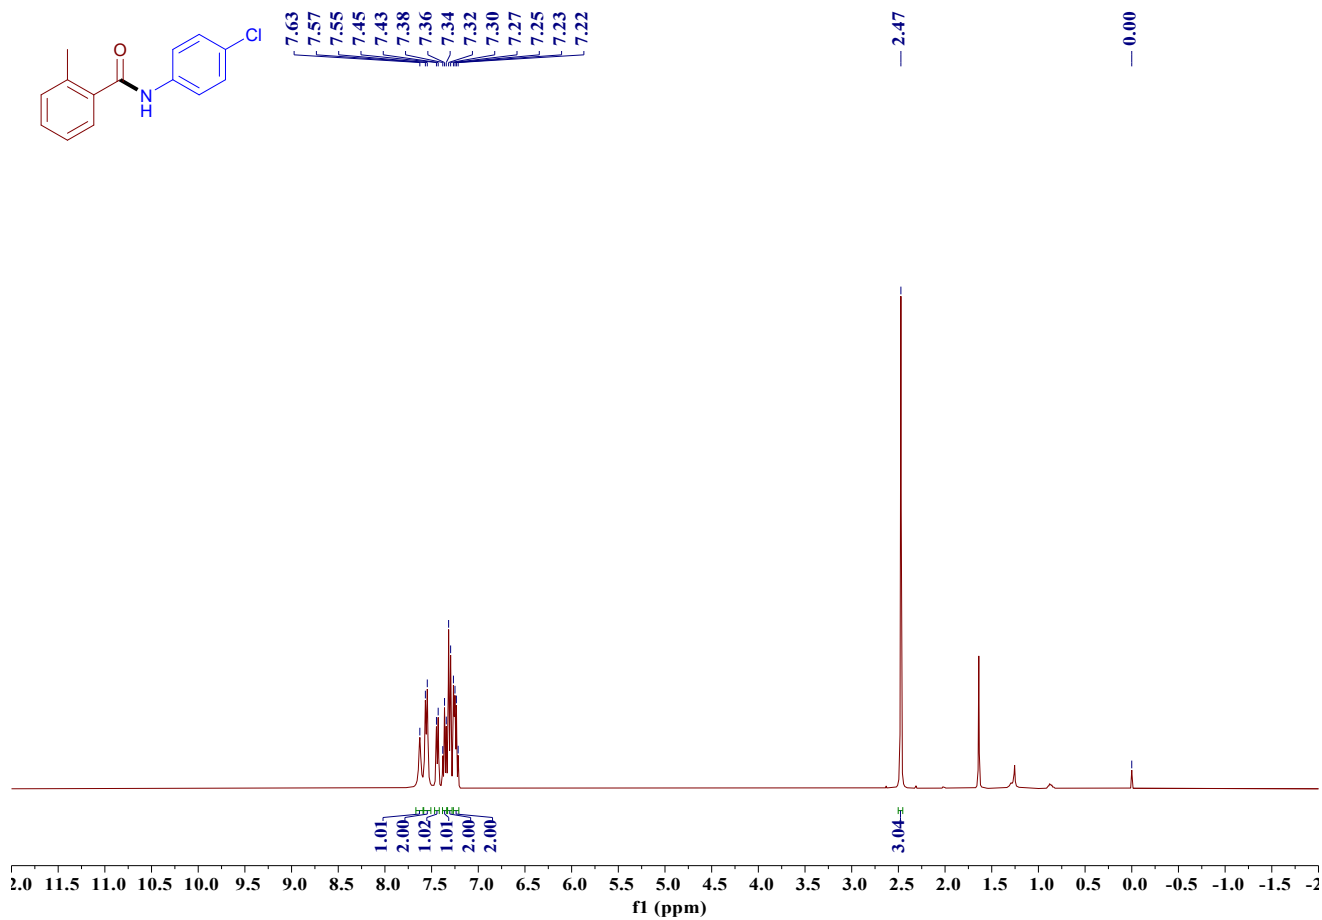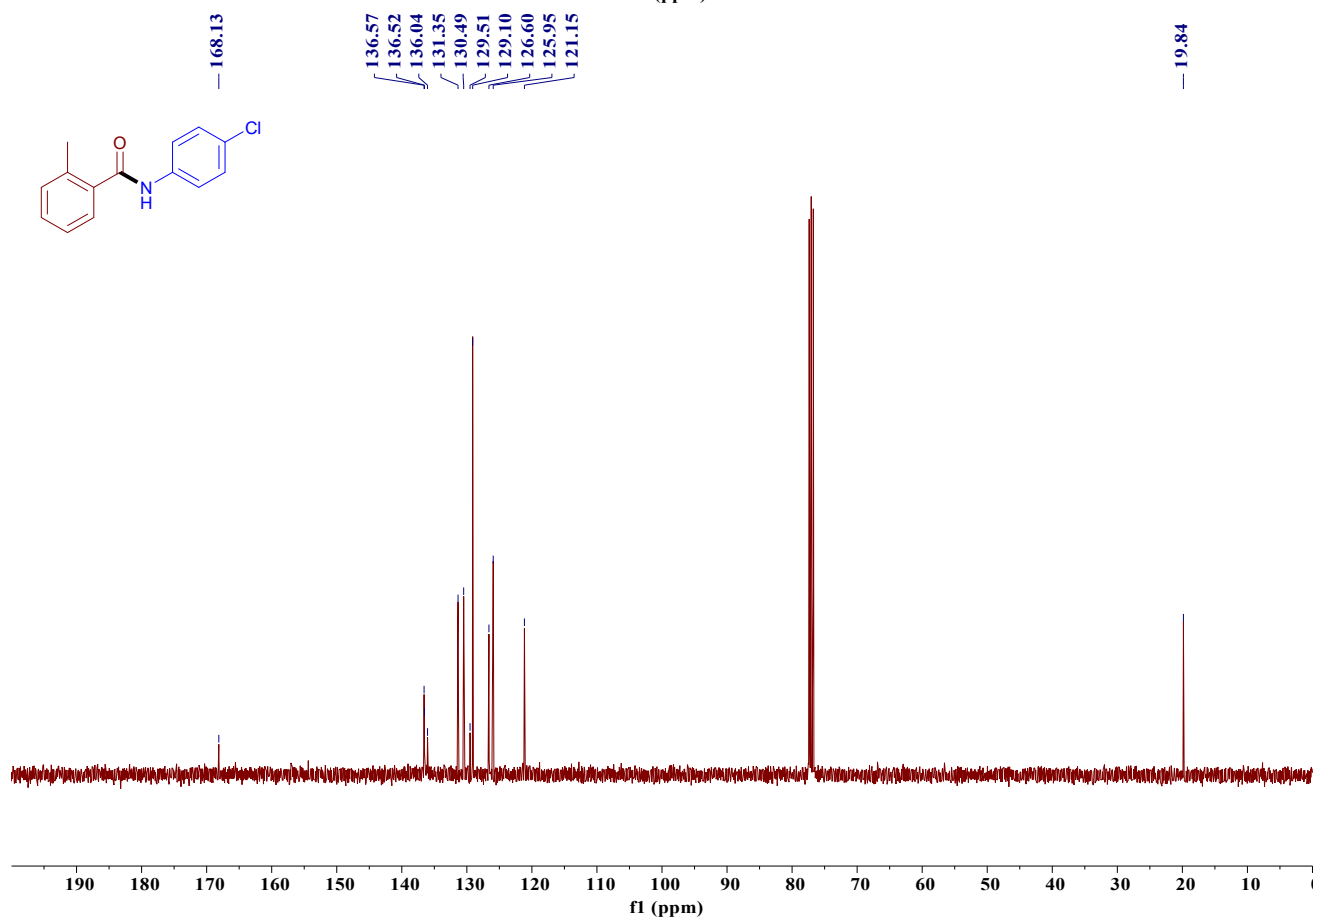

$^1\text{H}$  NMR (400 MHz,  $\text{CDCl}_3$ ),  $^{13}\text{C}$  NMR (100 MHz,  $\text{CDCl}_3$ ),  $^{19}\text{F}$  NMR (376 MHz,  $\text{CDCl}_3$ ) of product 3ad

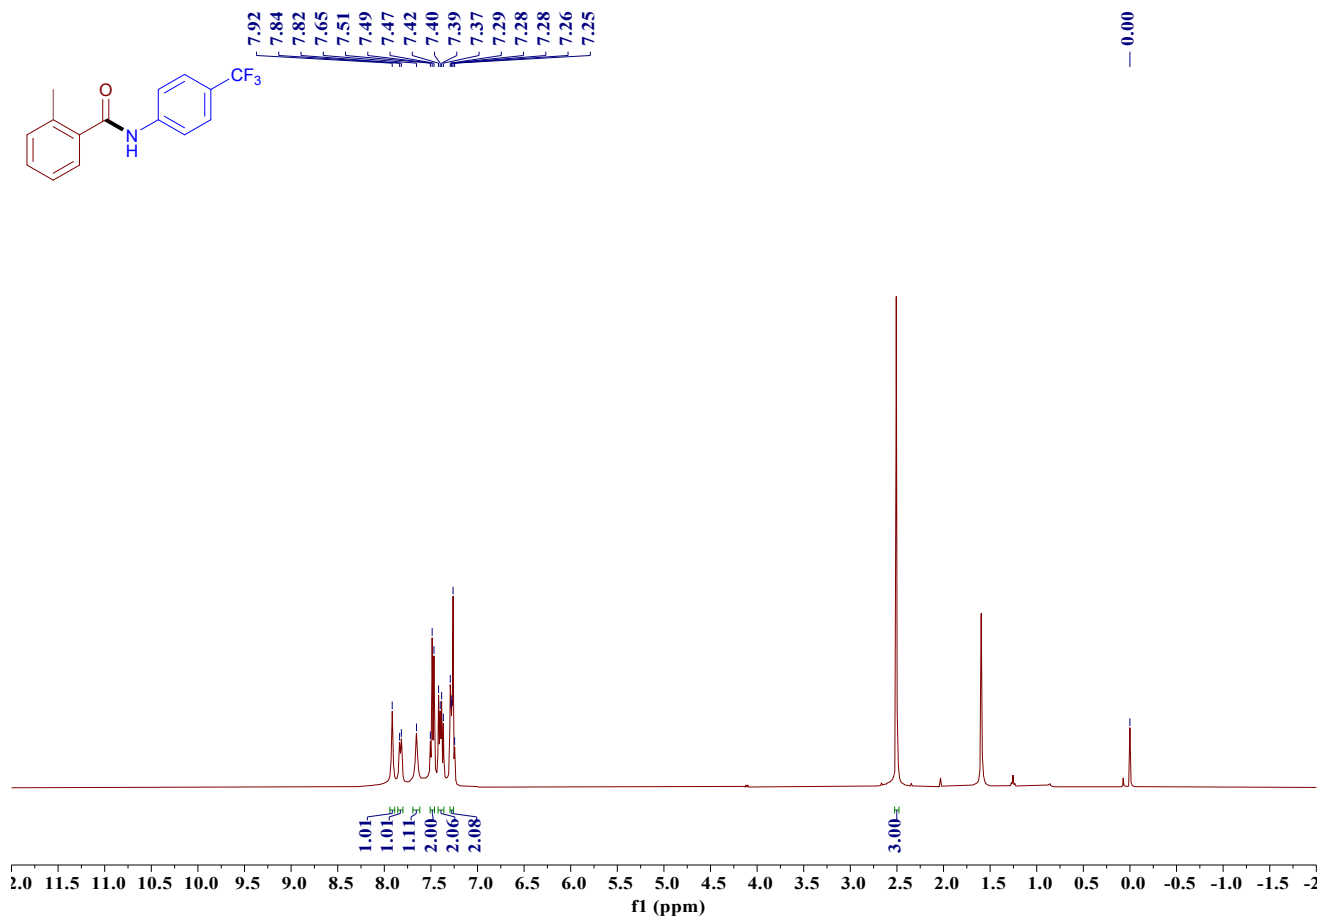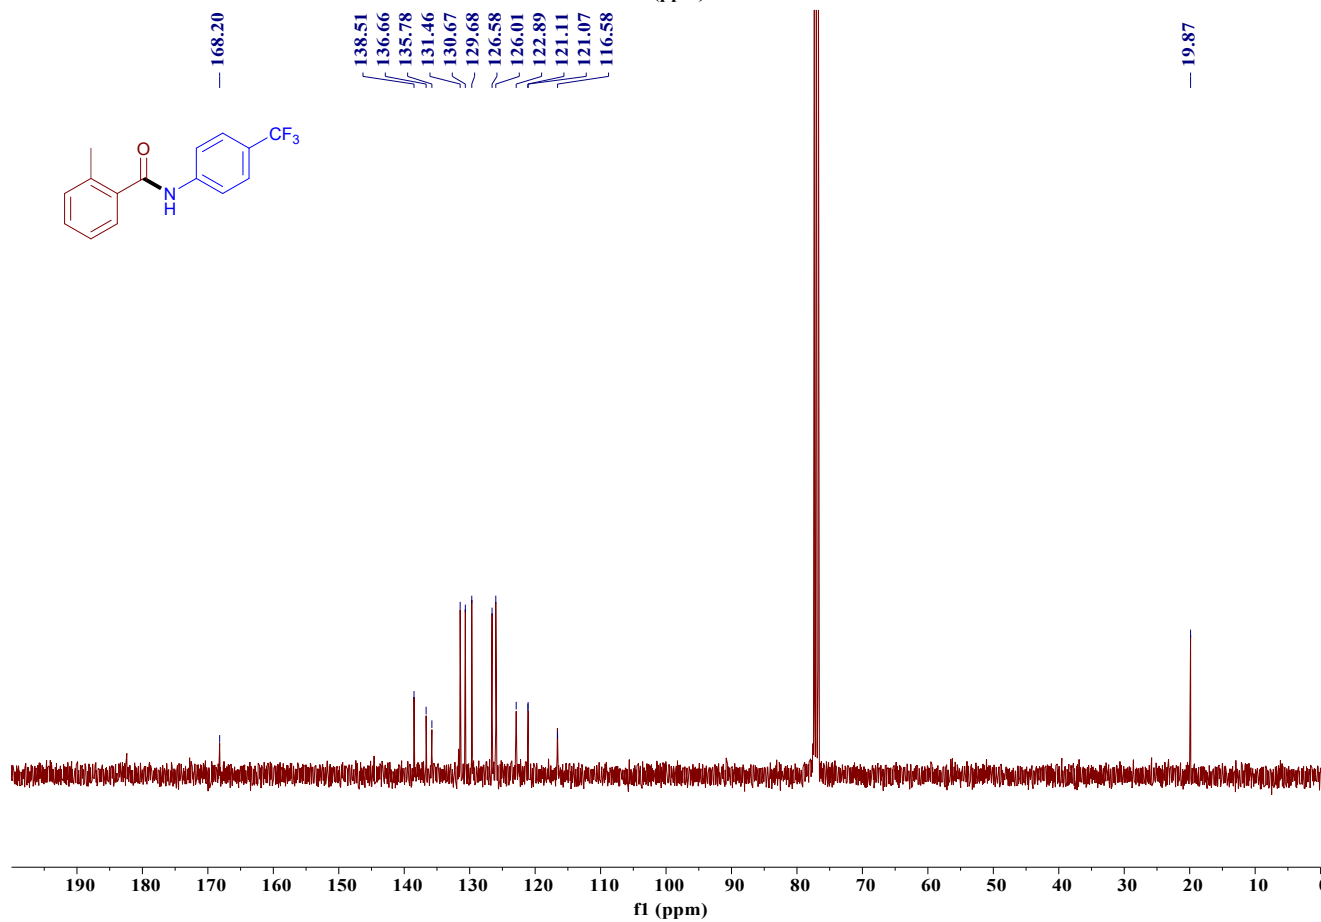

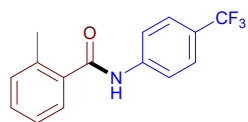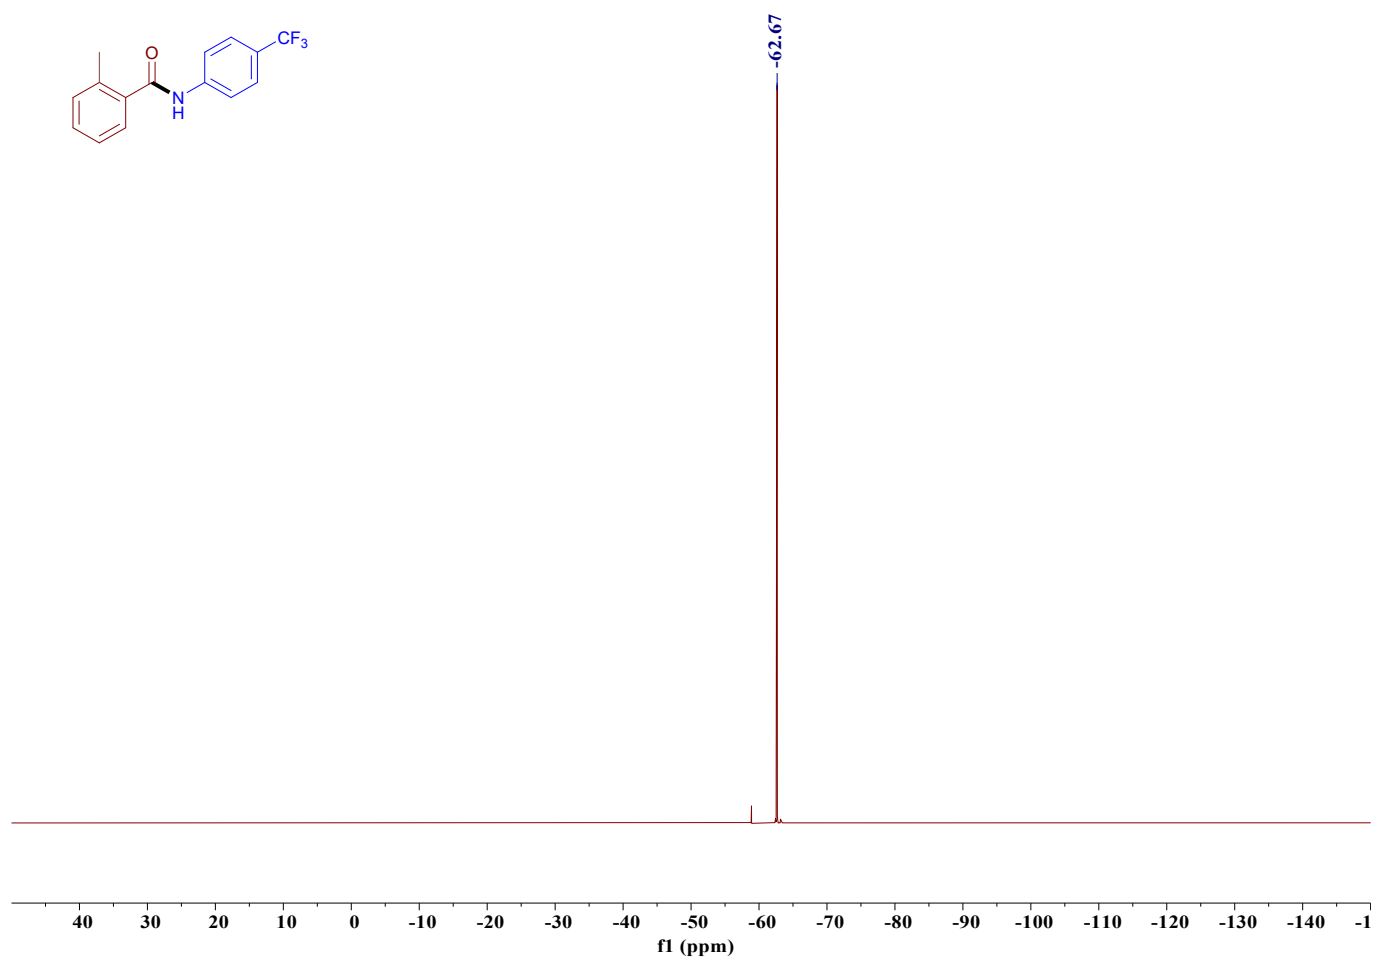

<sup>1</sup>H NMR (400 MHz, CDCl<sub>3</sub>), <sup>13</sup>C NMR (100 MHz, CDCl<sub>3</sub>) of product 6aa

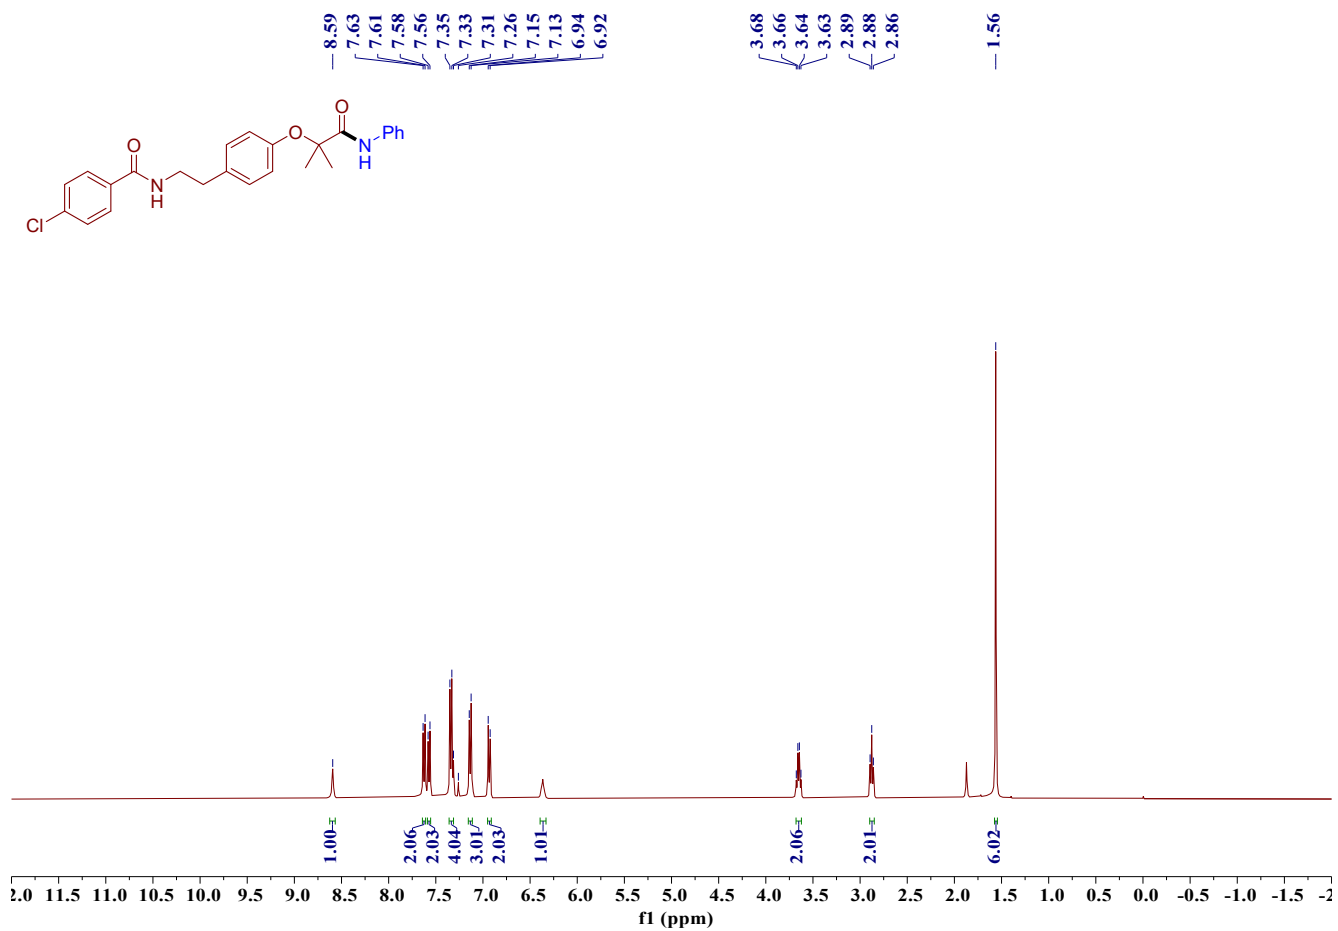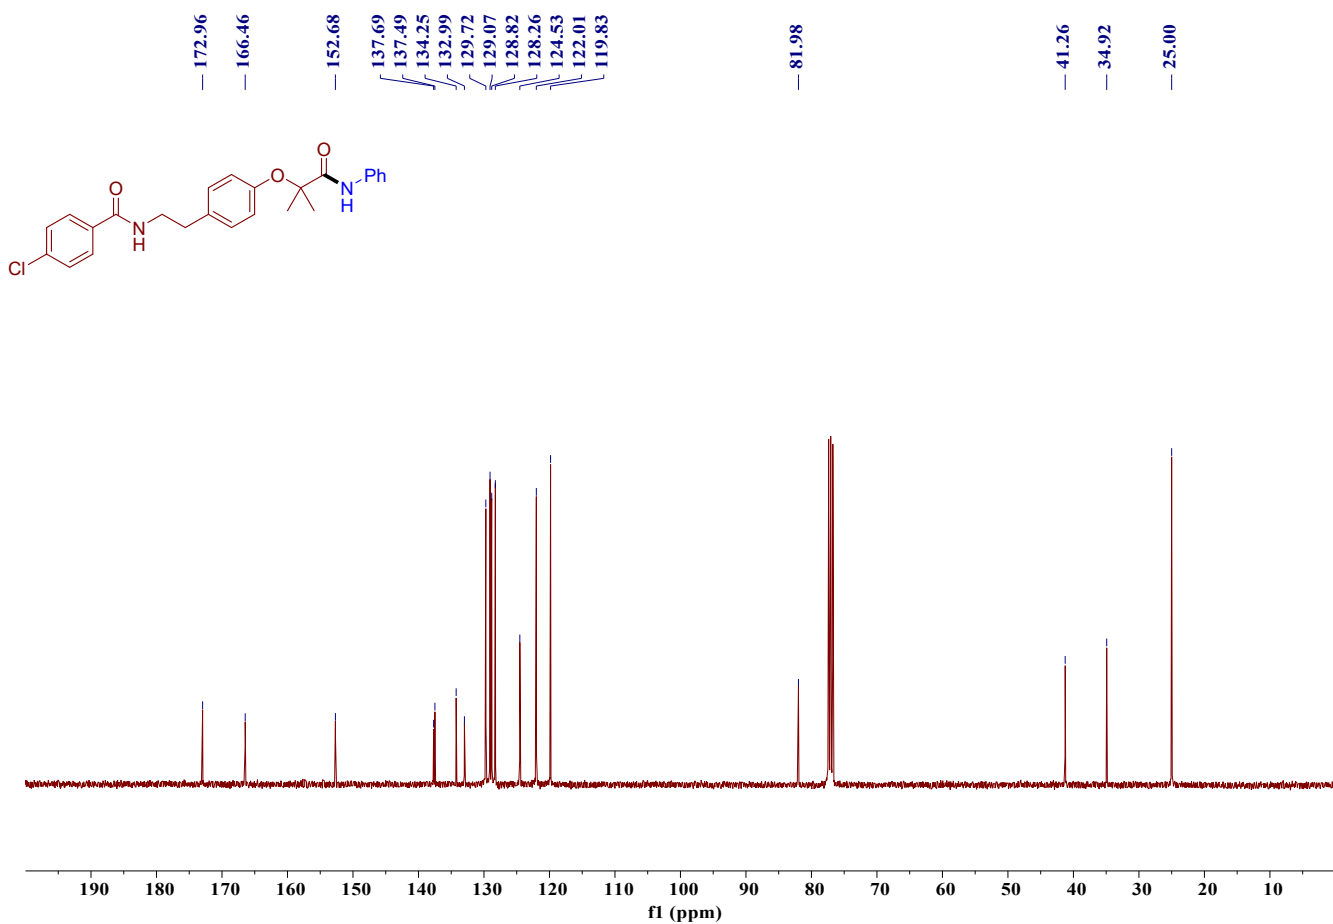

<sup>1</sup>H NMR (400 MHz, CDCl<sub>3</sub>), <sup>13</sup>C NMR (100 MHz, CDCl<sub>3</sub>) of product 6ba

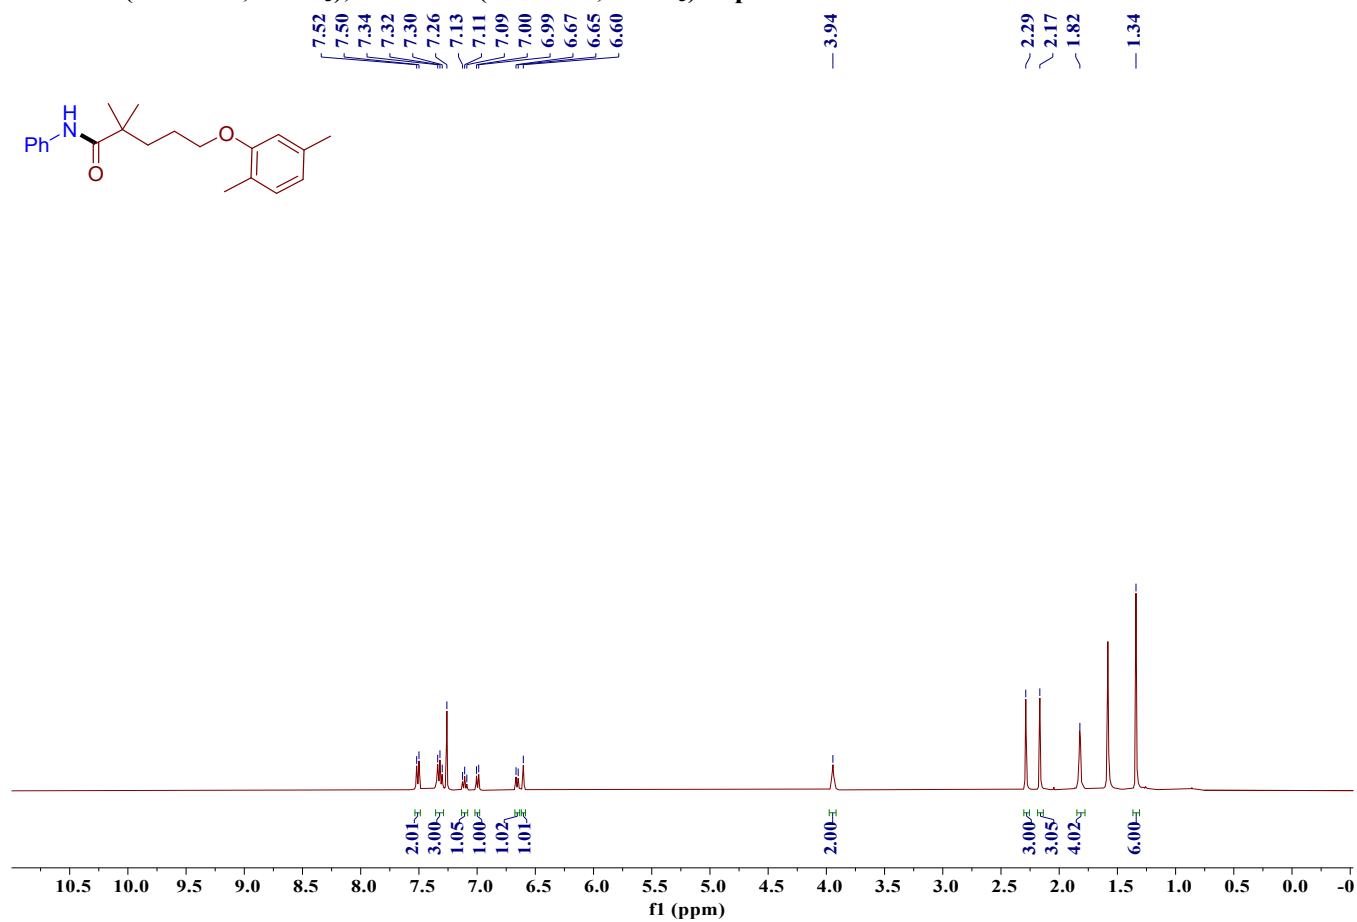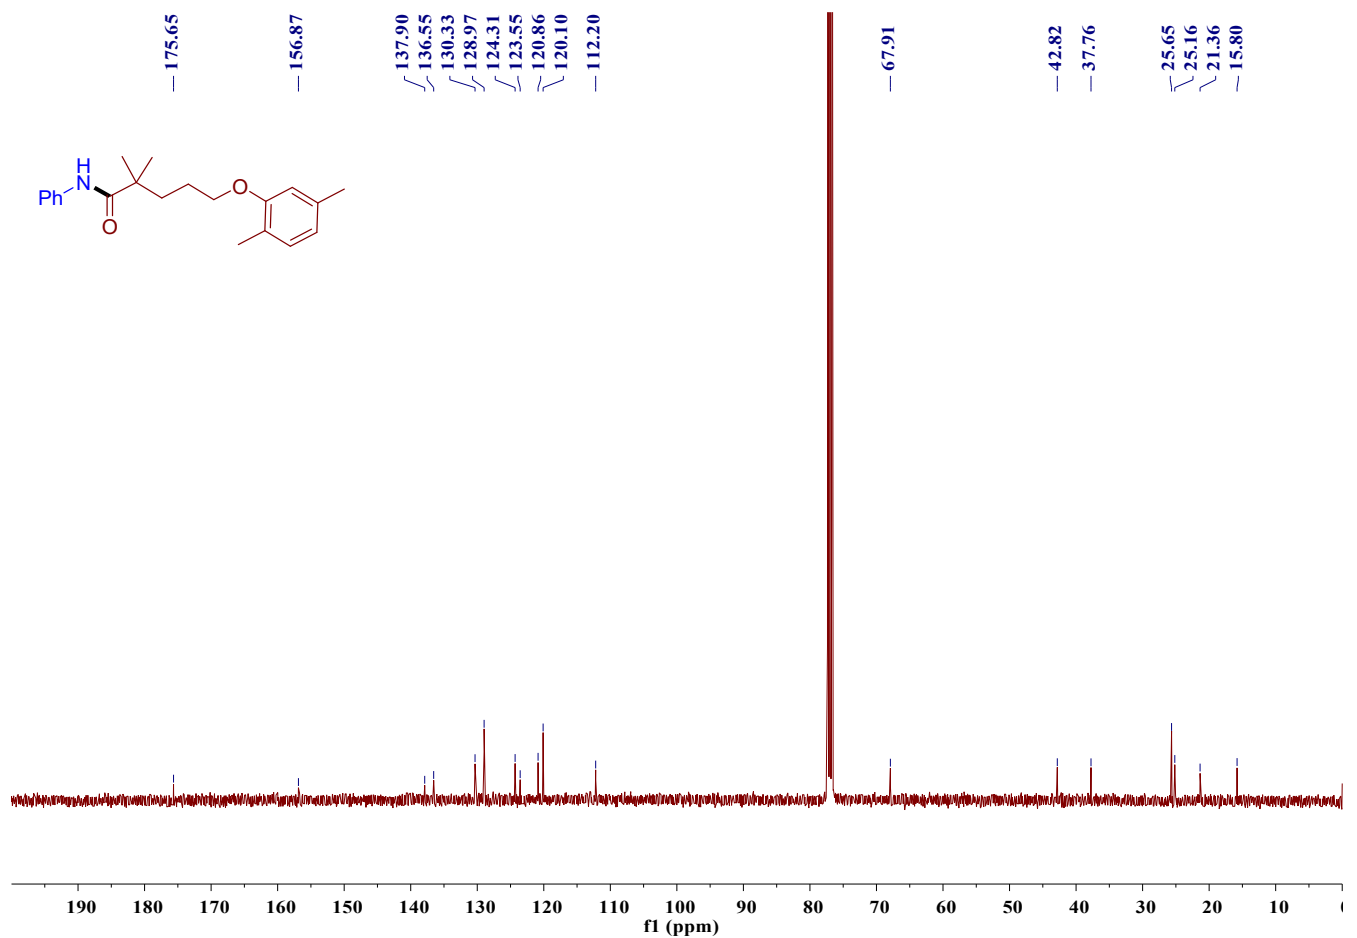

$^1\text{H}$  NMR (400 MHz,  $\text{CDCl}_3$ ),  $^{13}\text{C}$  NMR (100 MHz,  $\text{CDCl}_3$ ),  $^{19}\text{F}$  NMR (376 MHz,  $\text{CDCl}_3$ ) of product 6ca

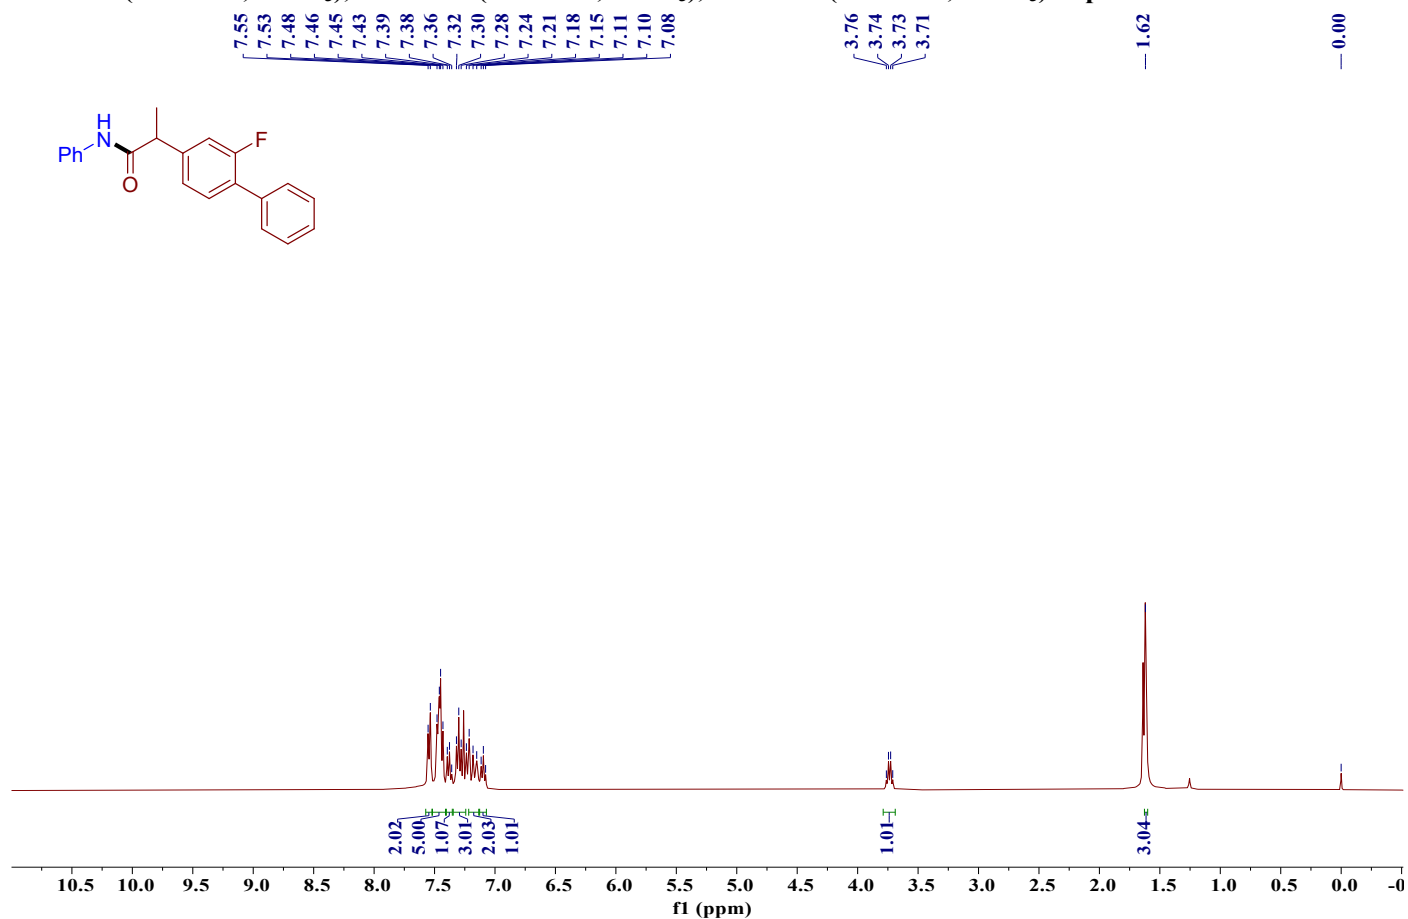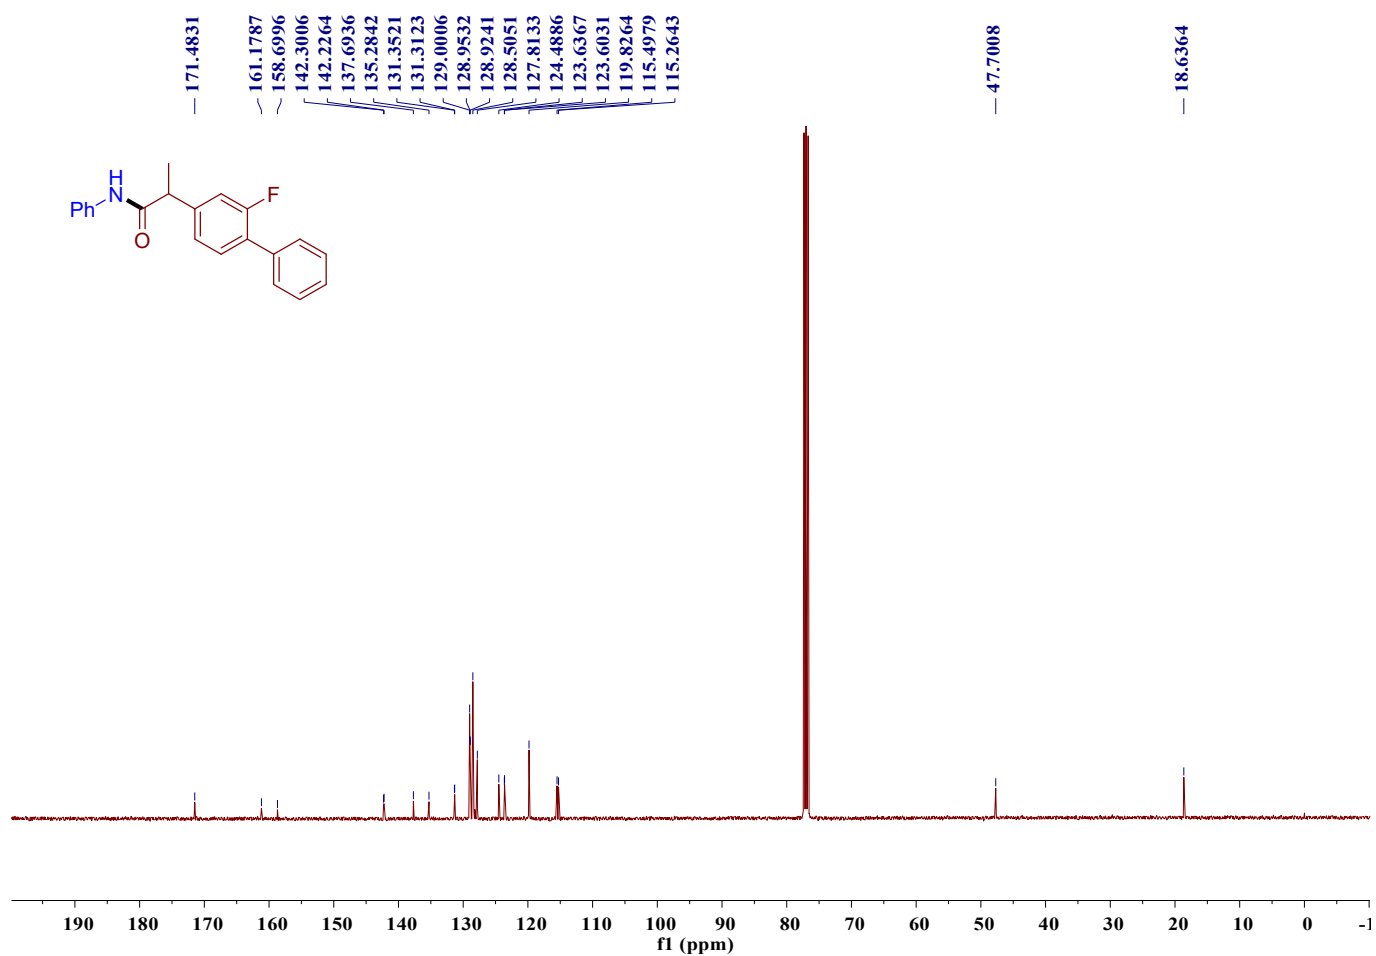

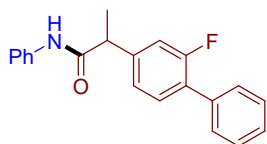

-116.71

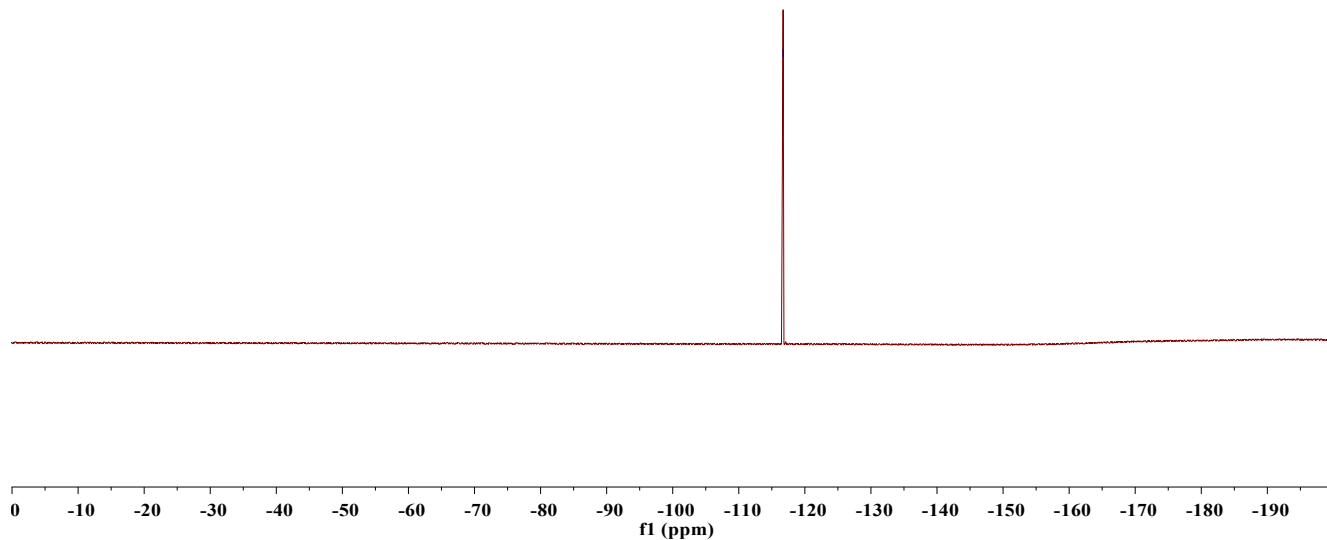

<sup>1</sup>H NMR (400 MHz, CDCl<sub>3</sub>), <sup>13</sup>C NMR (100 MHz, CDCl<sub>3</sub>) of product6da

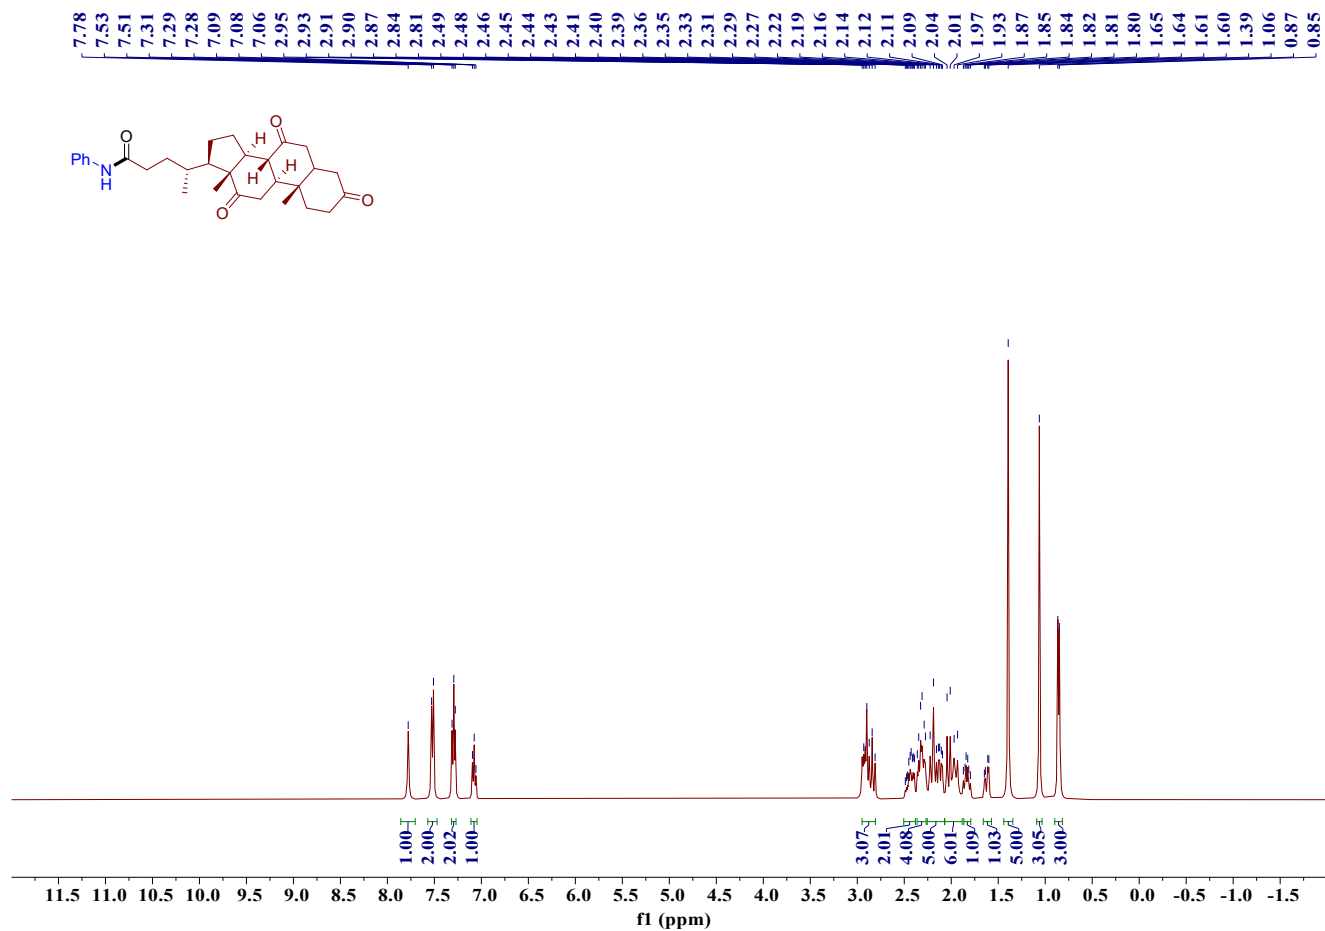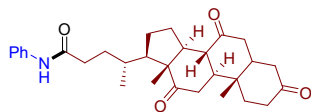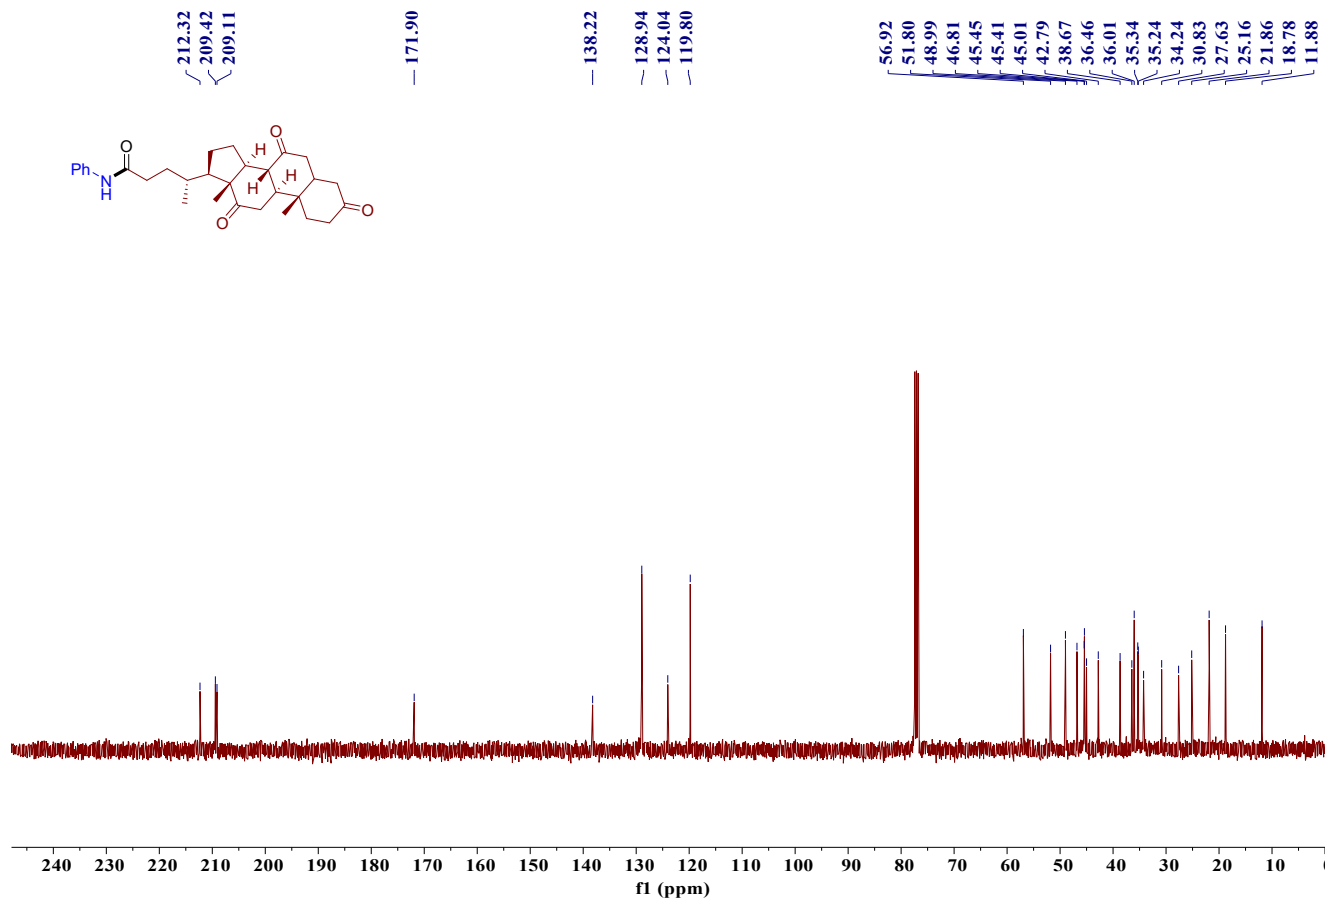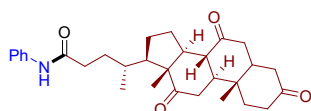



<sup>1</sup>H NMR (400 MHz, CDCl<sub>3</sub>), <sup>13</sup>C NMR (100 MHz, CDCl<sub>3</sub>) of product 6ea

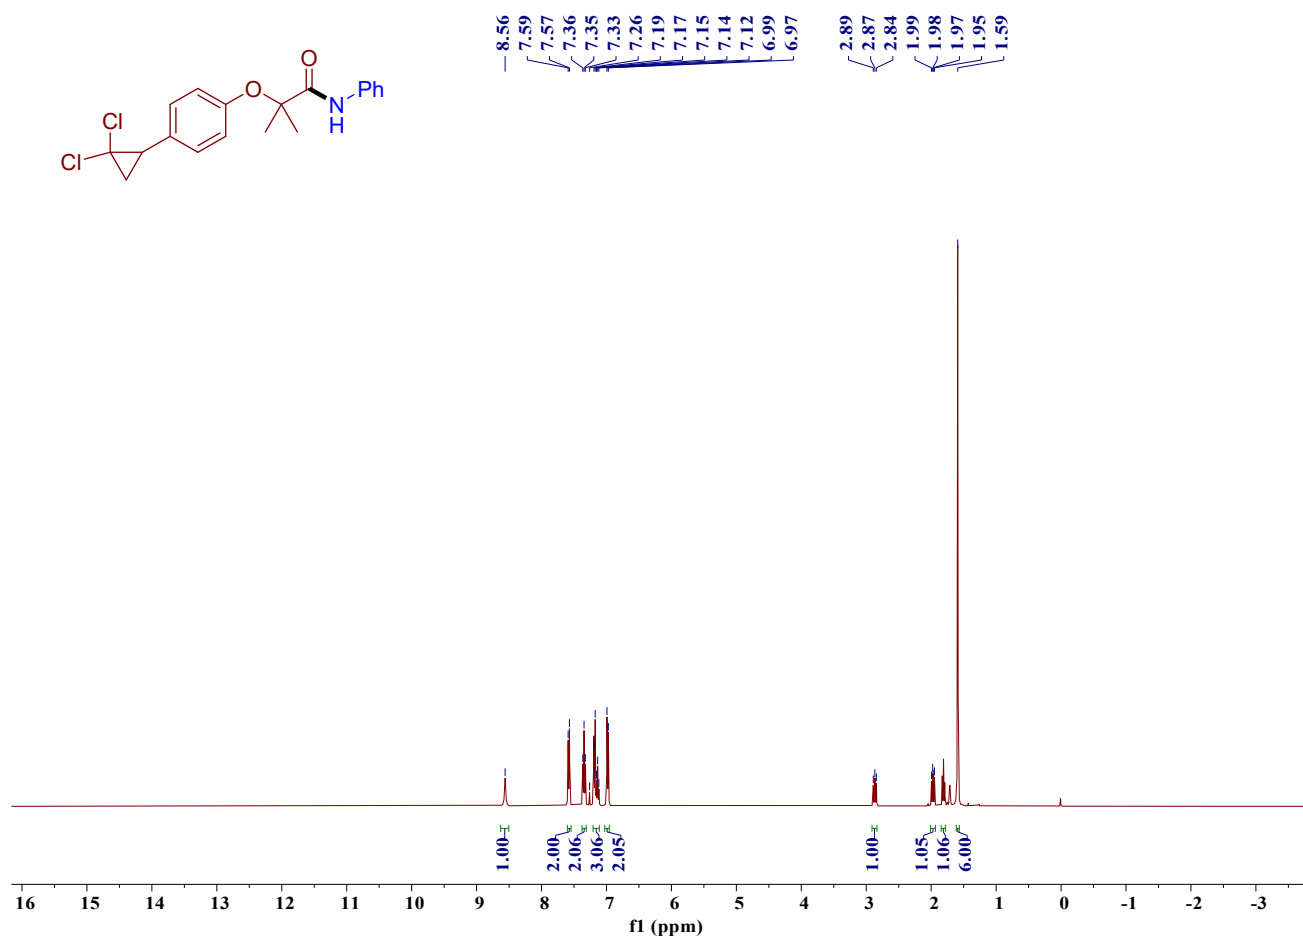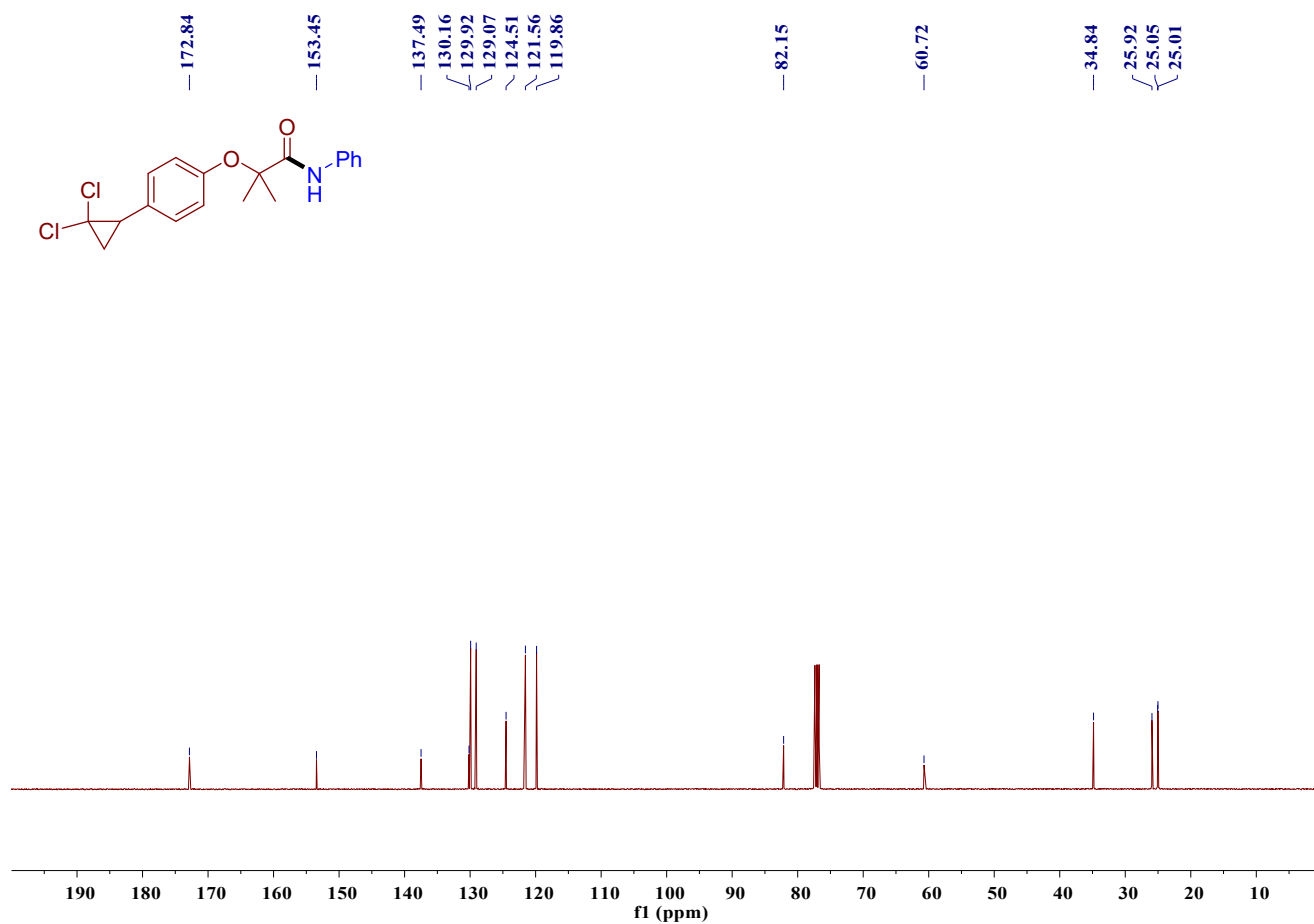

<sup>1</sup>H NMR (400 MHz, CDCl<sub>3</sub>), <sup>13</sup>C NMR (100 MHz, CDCl<sub>3</sub>) of product 6fa

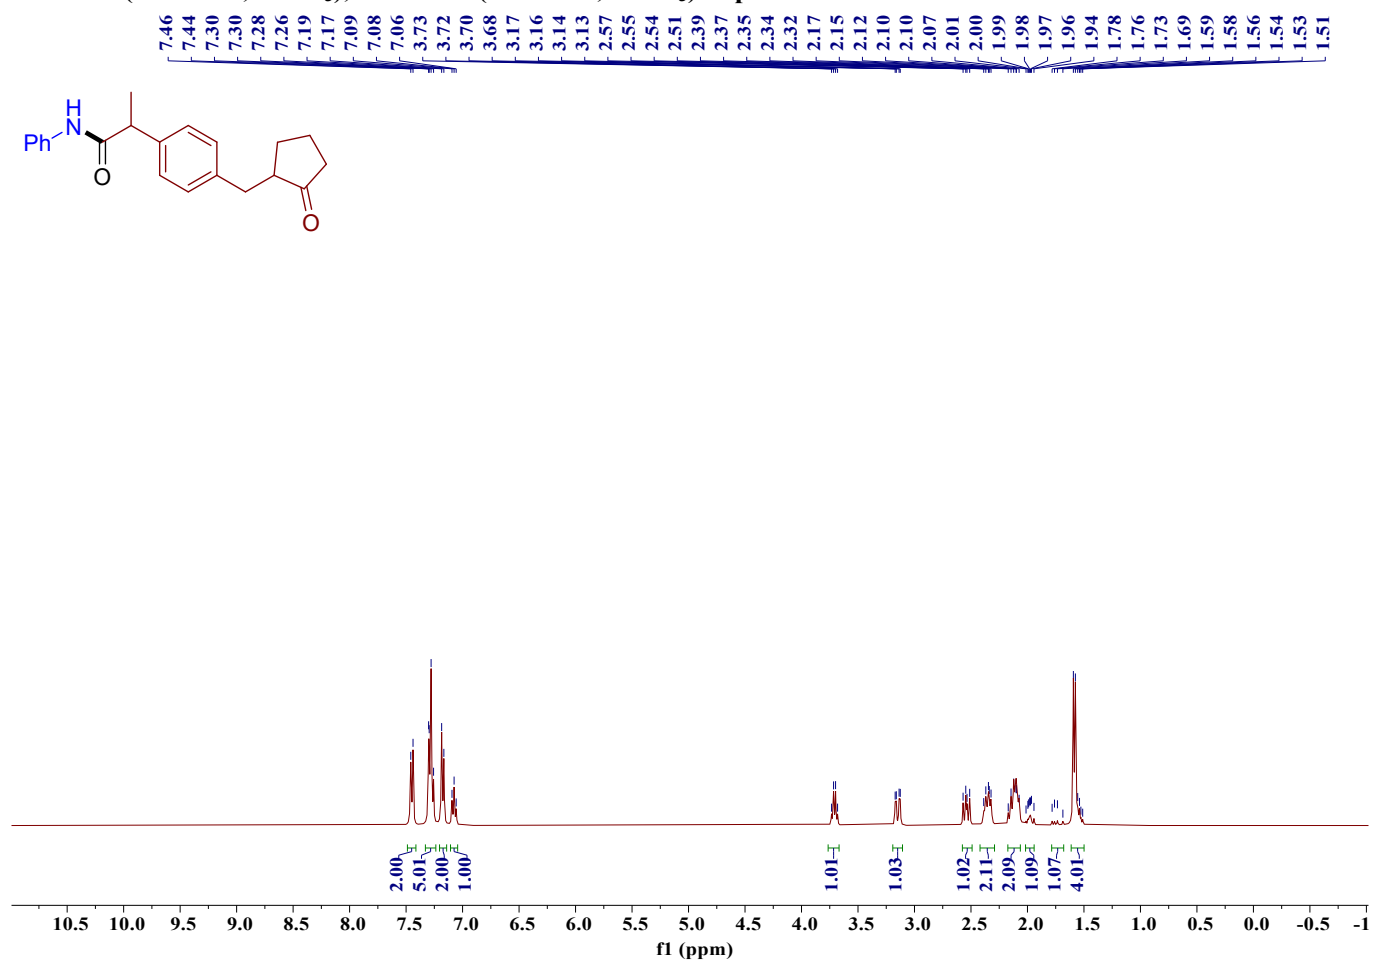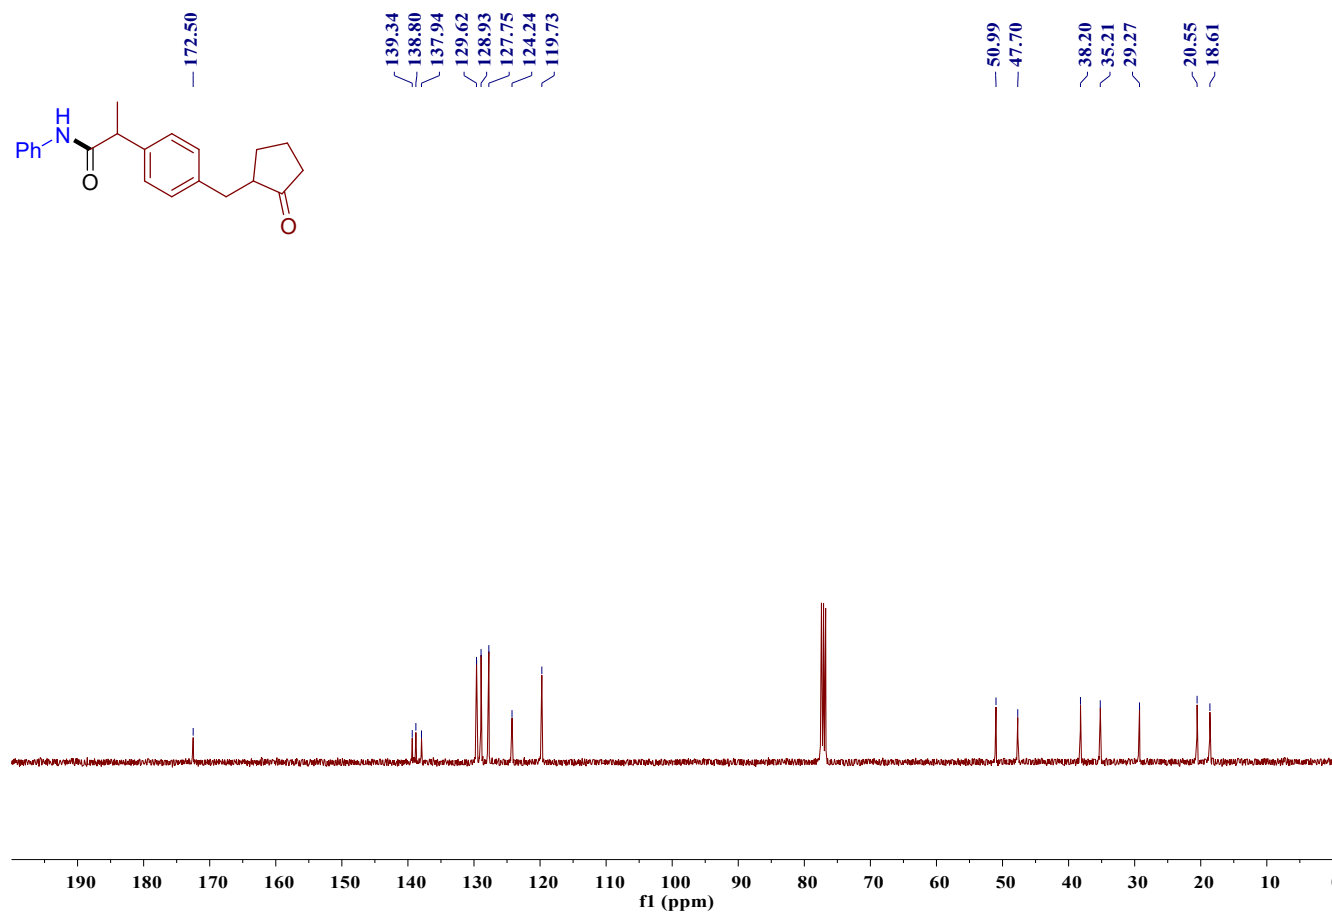

$^1\text{H}$  NMR (400 MHz,  $\text{CDCl}_3$ ),  $^{13}\text{C}$  NMR (100 MHz,  $\text{CDCl}_3$ ) of product 7

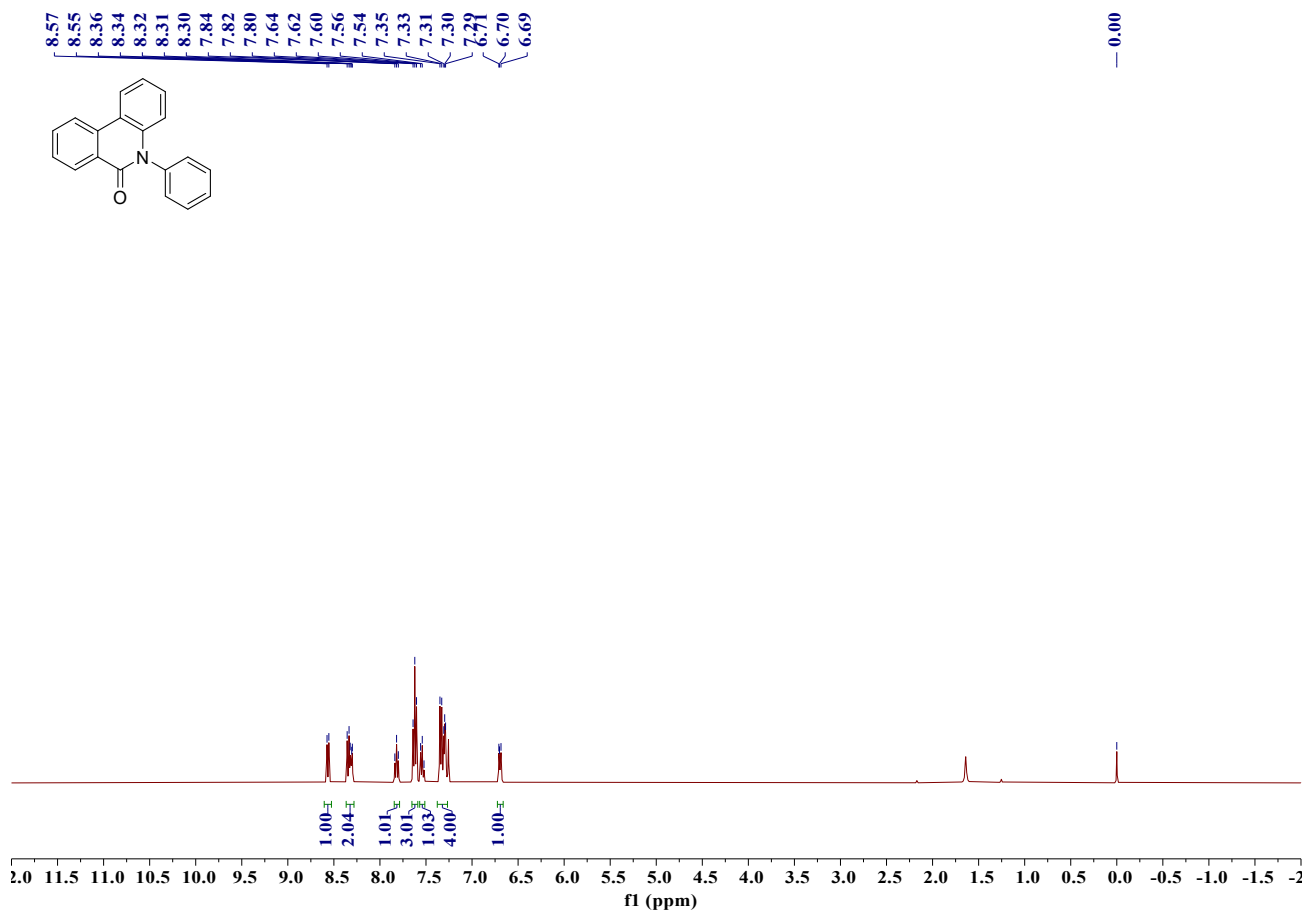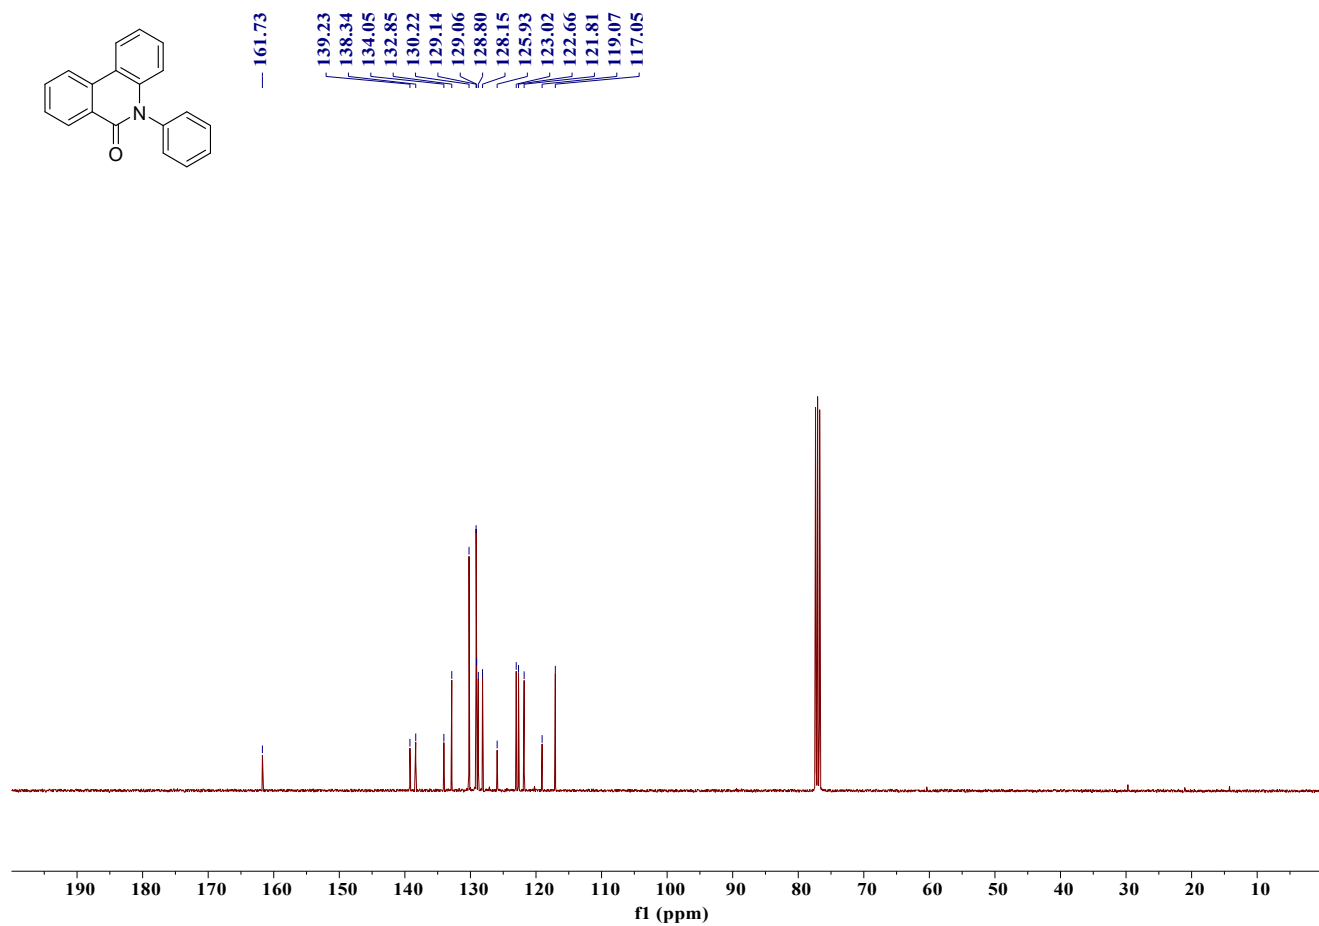

$^1\text{H}$  NMR (400 MHz,  $\text{CDCl}_3$ ),  $^{13}\text{C}$  NMR (100 MHz,  $\text{CDCl}_3$ ) of product 8

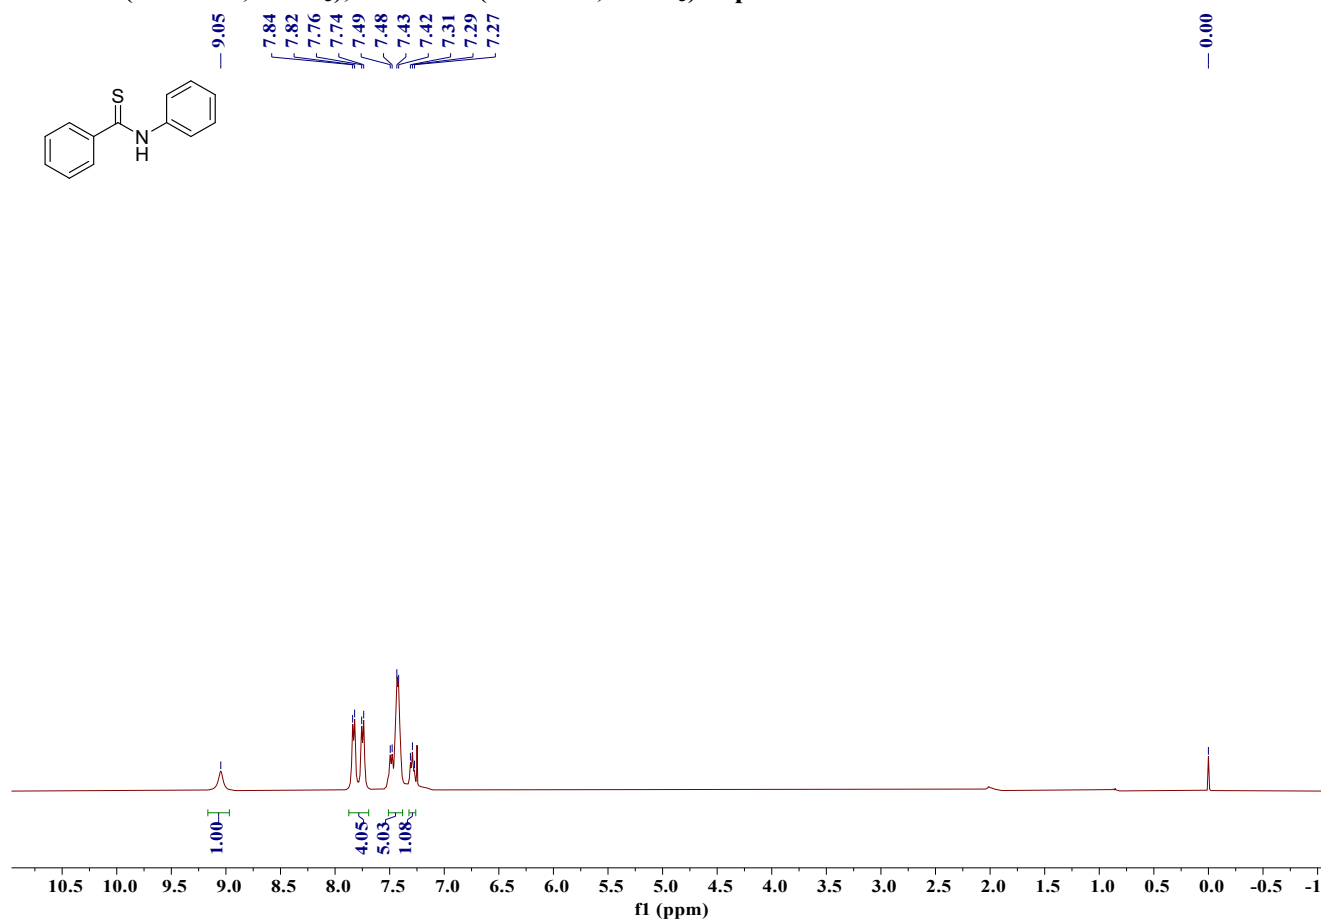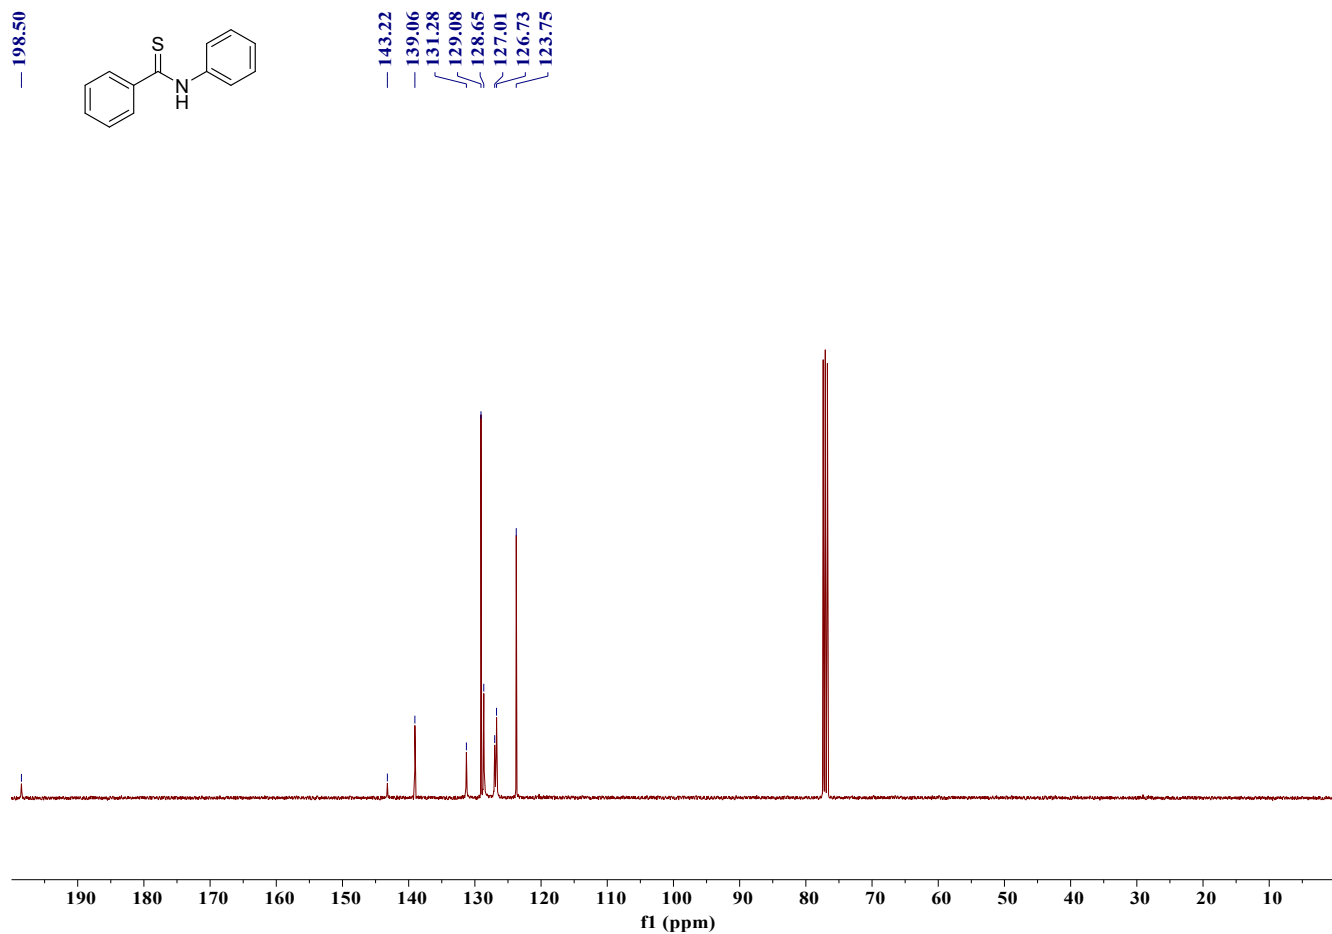

<sup>1</sup>H NMR (400 MHz, CDCl<sub>3</sub>), <sup>13</sup>C NMR (100 MHz, CDCl<sub>3</sub>) of product 9

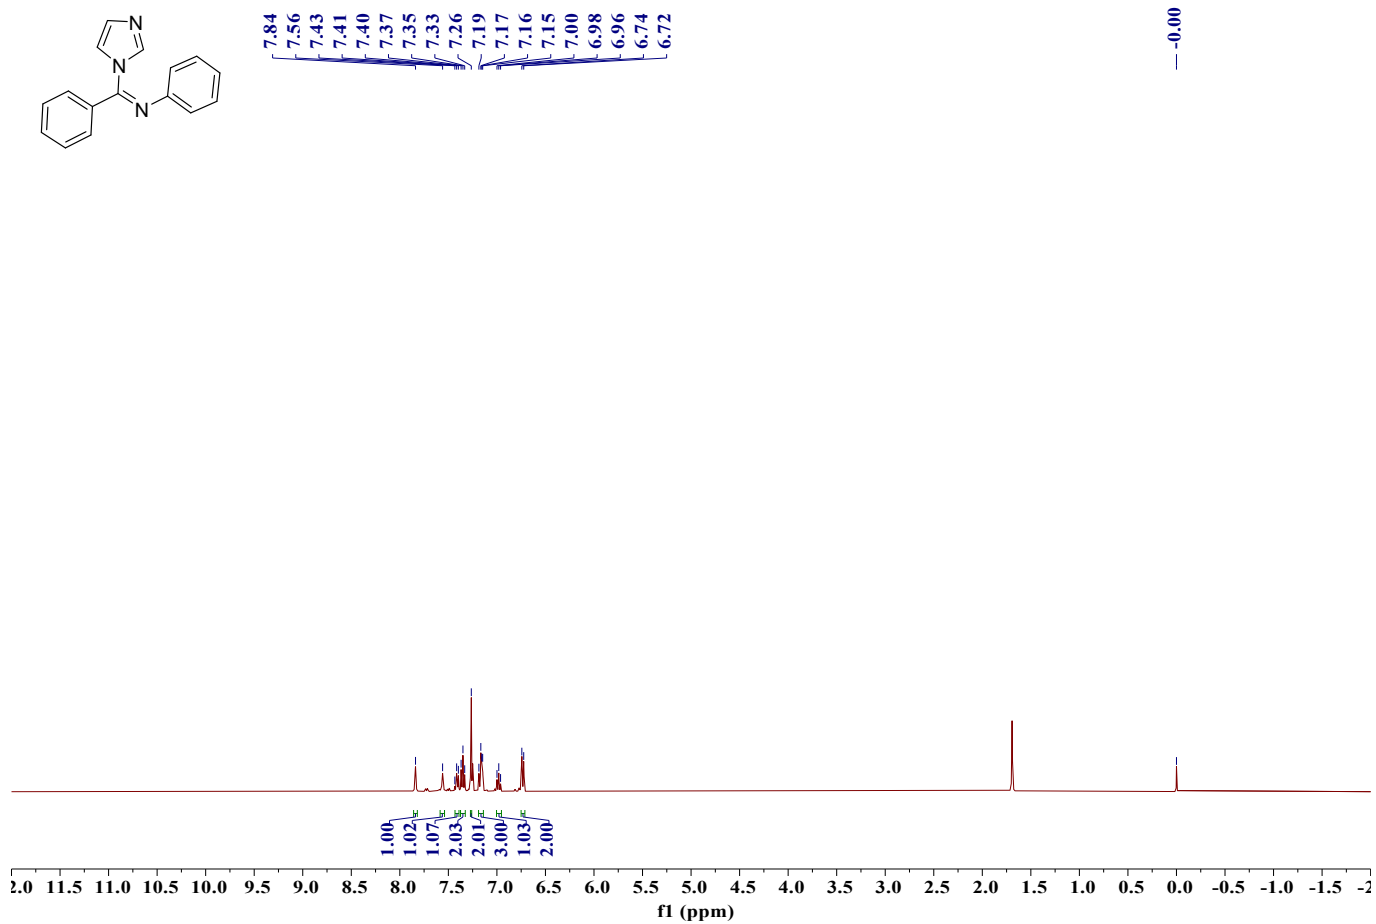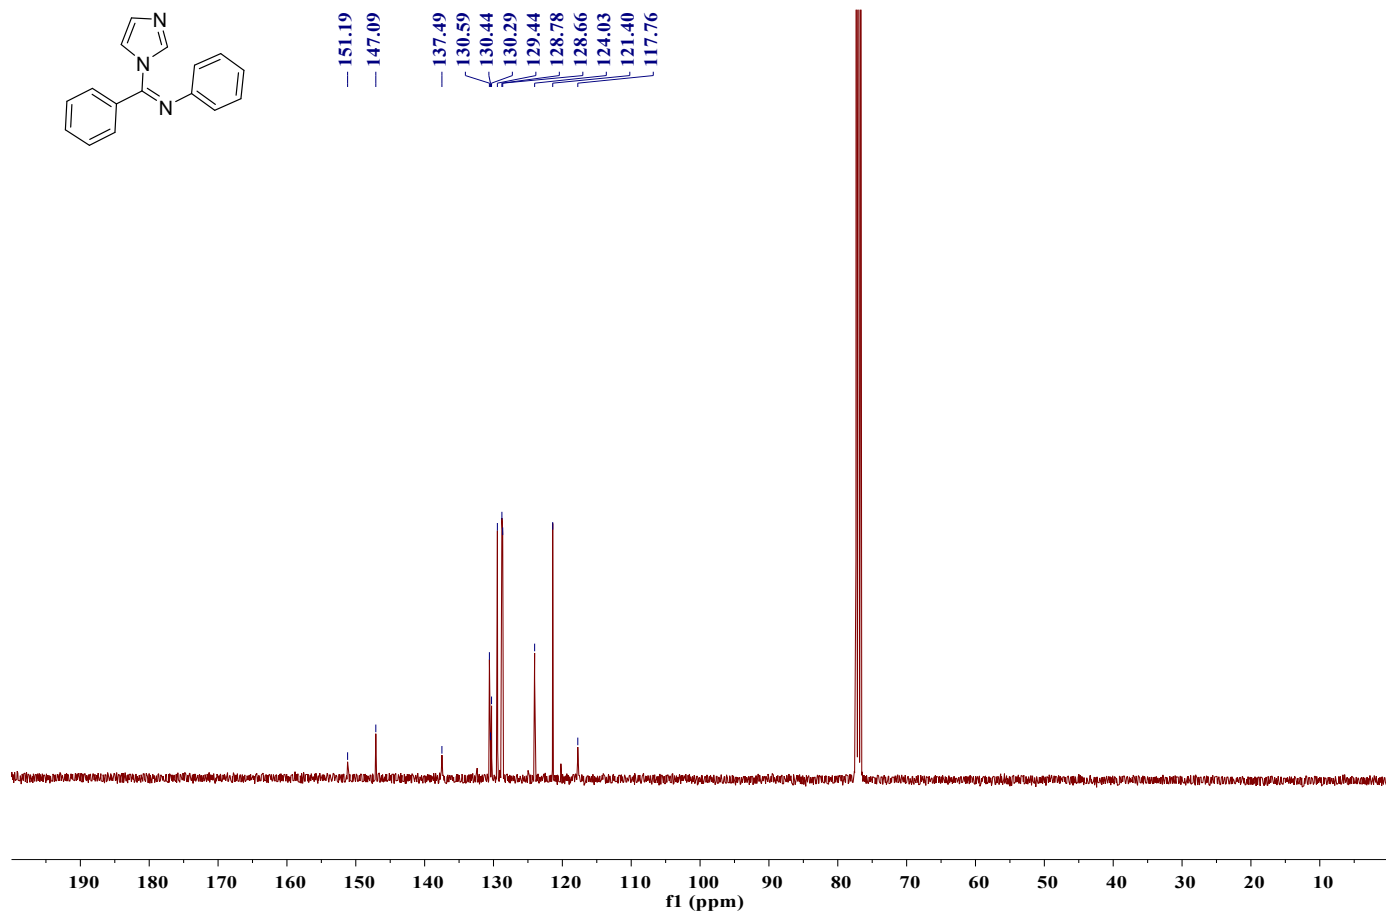

Supplement: d2cc05826j1.pdf [file d2cc05826j1.pdf]
